# Supplementary material
Source: PubMed Central journal article supplement (PMC7901022)
Supplement: jo0c02913_si_001.pdf [file jo0c02913_si_001.pdf]

# **Stereoselective Synthesis and Structural Confirmation of the Specialized Pro-resolving Mediator Resolvin E4**

*Amalie Føreid Reinertsen,<sup>†§</sup> Karoline Gangestad Primdahl,<sup>†§</sup> Ashley Elizabeth Shay,<sup>‡</sup> Charles  
Nicholas Serhan,<sup>‡</sup> Trond Vidar Hansen,<sup>†</sup> and Marius Aursnes<sup>†§\*</sup>*

<sup>†</sup>Department of Pharmacy, Section for Pharmaceutical Chemistry, University of Oslo, P.O.  
Box 1068, 0316 Oslo, Norway

<sup>‡</sup>Center for Experimental Therapeutics and Reperfusion Injury, Department of  
Anesthesiology, Perioperative and Pain Medicine, Hale Building for Transformative  
Medicine, Brigham and Women's Hospital and Harvard Medical School, Boston,  
Massachusetts, 02115

## **Table of Contents**

|                                                     |     |
|-----------------------------------------------------|-----|
| <sup>1</sup> H and <sup>13</sup> C NMR-Spectra..... | S2  |
| UV-Vis Spectrum.....                                | S22 |
| HPLC Chromatograms.....                             | S23 |
| HRMS Spectra.....                                   | S30 |
| Specific Optical Rotations Comparisons.....         | S47 |

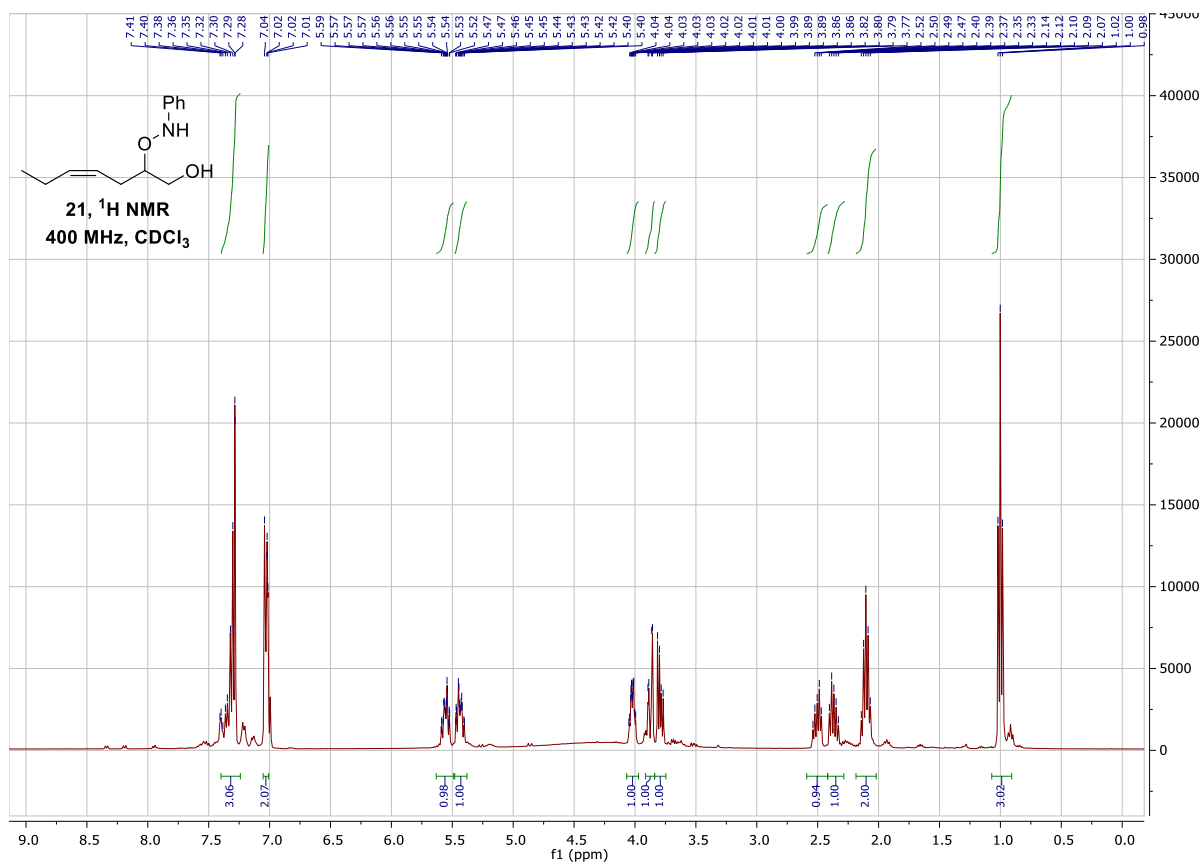

Figure S-1  $^1\text{H}$ -NMR spectrum of compound 21.

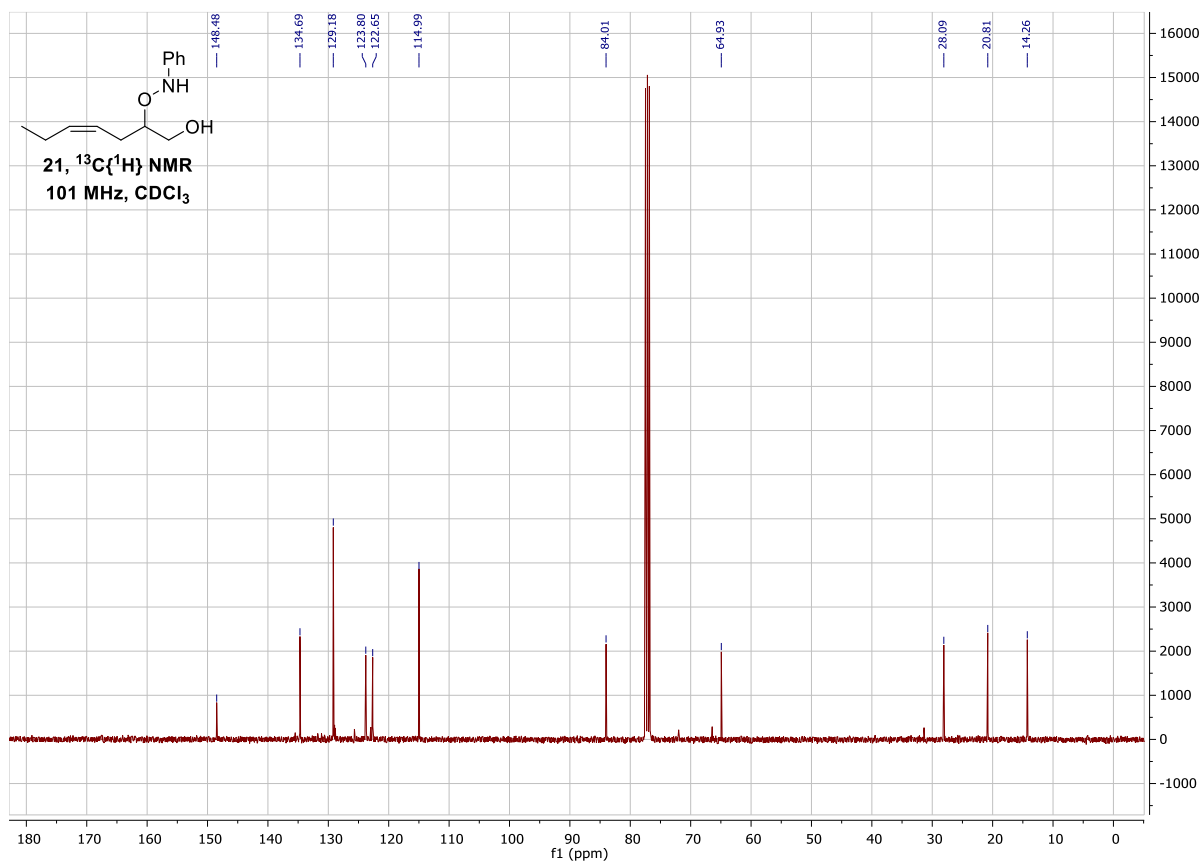

Figure S-2  $^{13}\text{C}$ -NMR spectrum of compound 21.

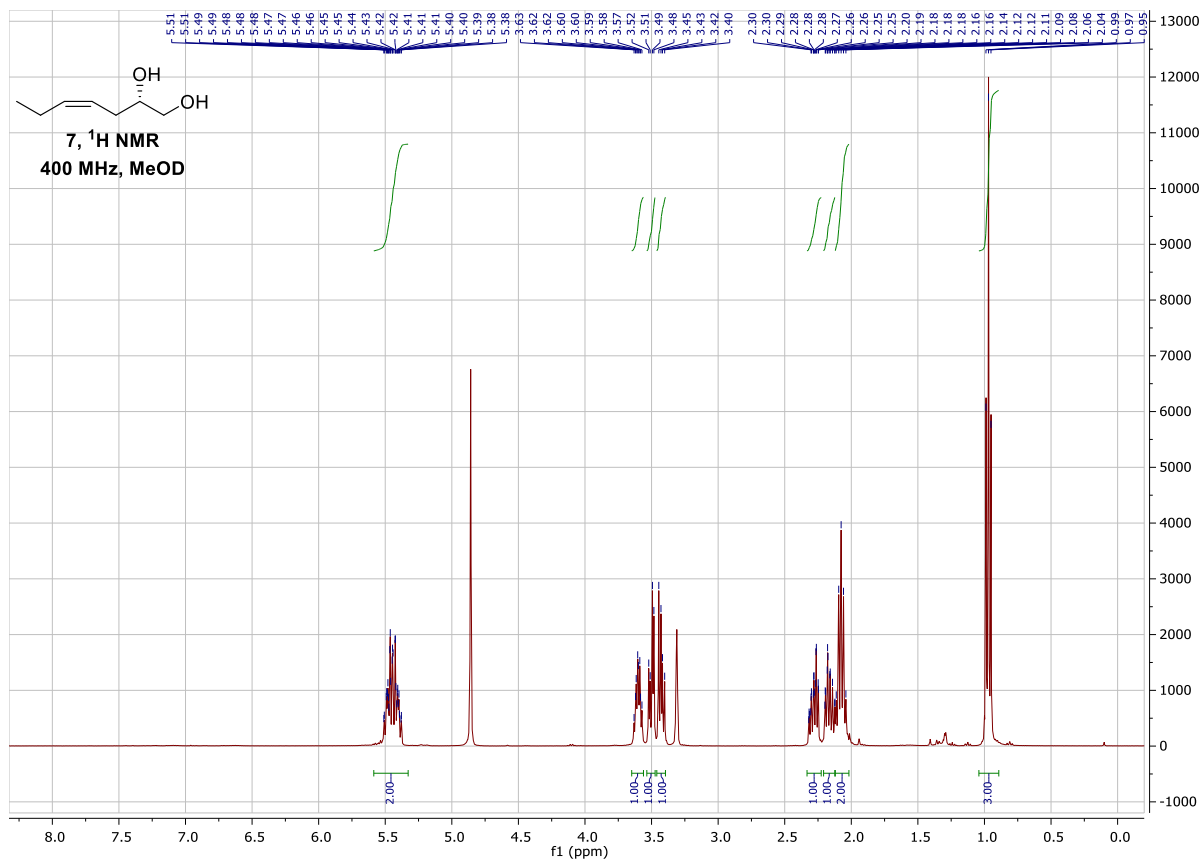

**Figure S-3  $^1\text{H}$ -NMR spectrum of compound 7.**

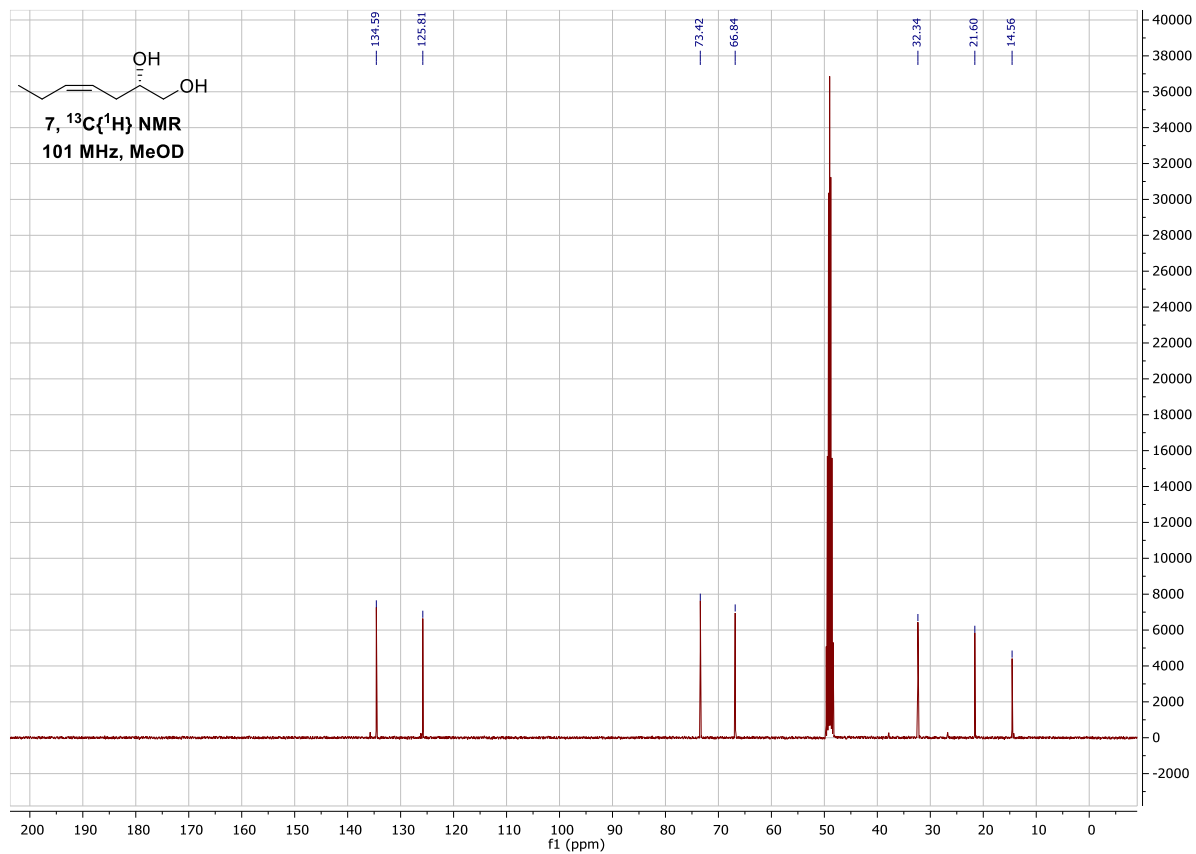

**Figure S-4  $^{13}\text{C}$ -NMR spectrum of compound 7.**

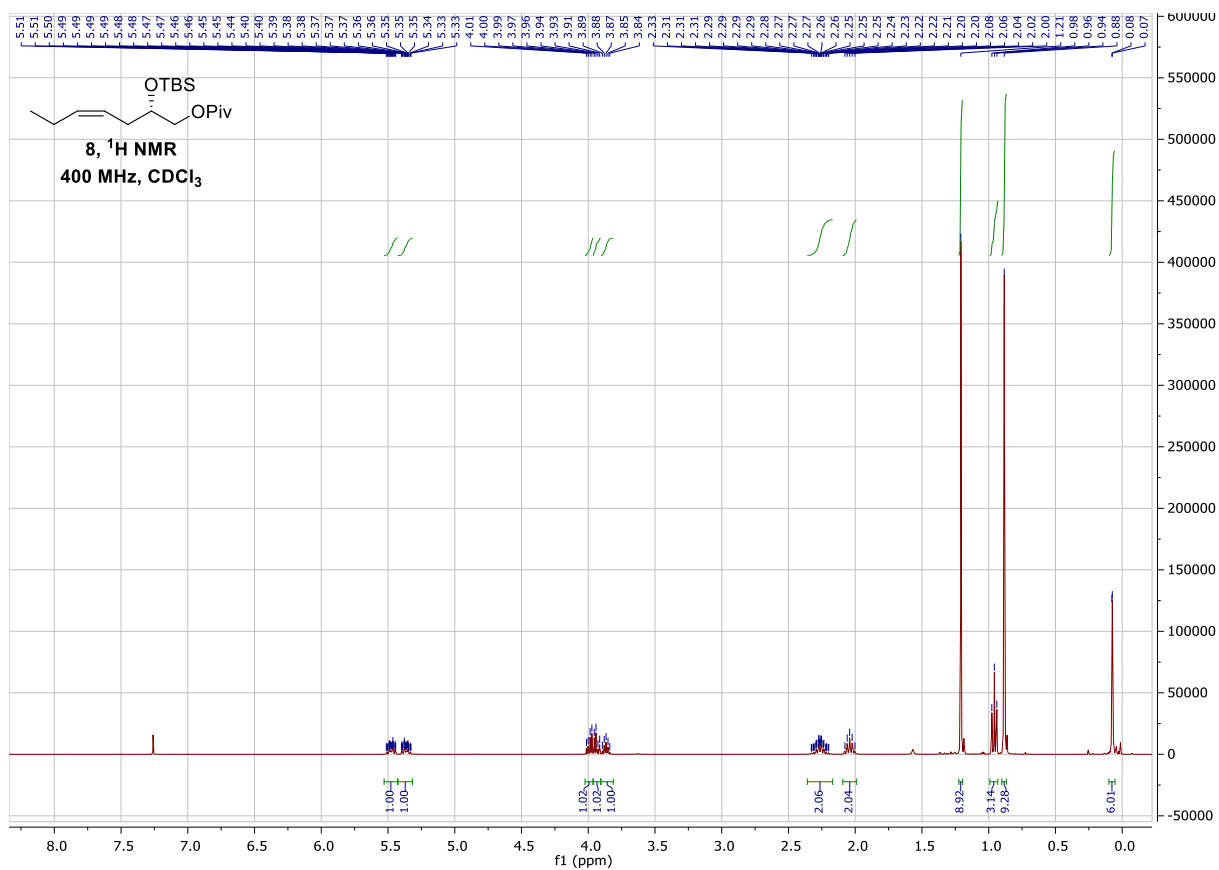

Figure S-5 <sup>1</sup>H-NMR spectrum of compound **8**.

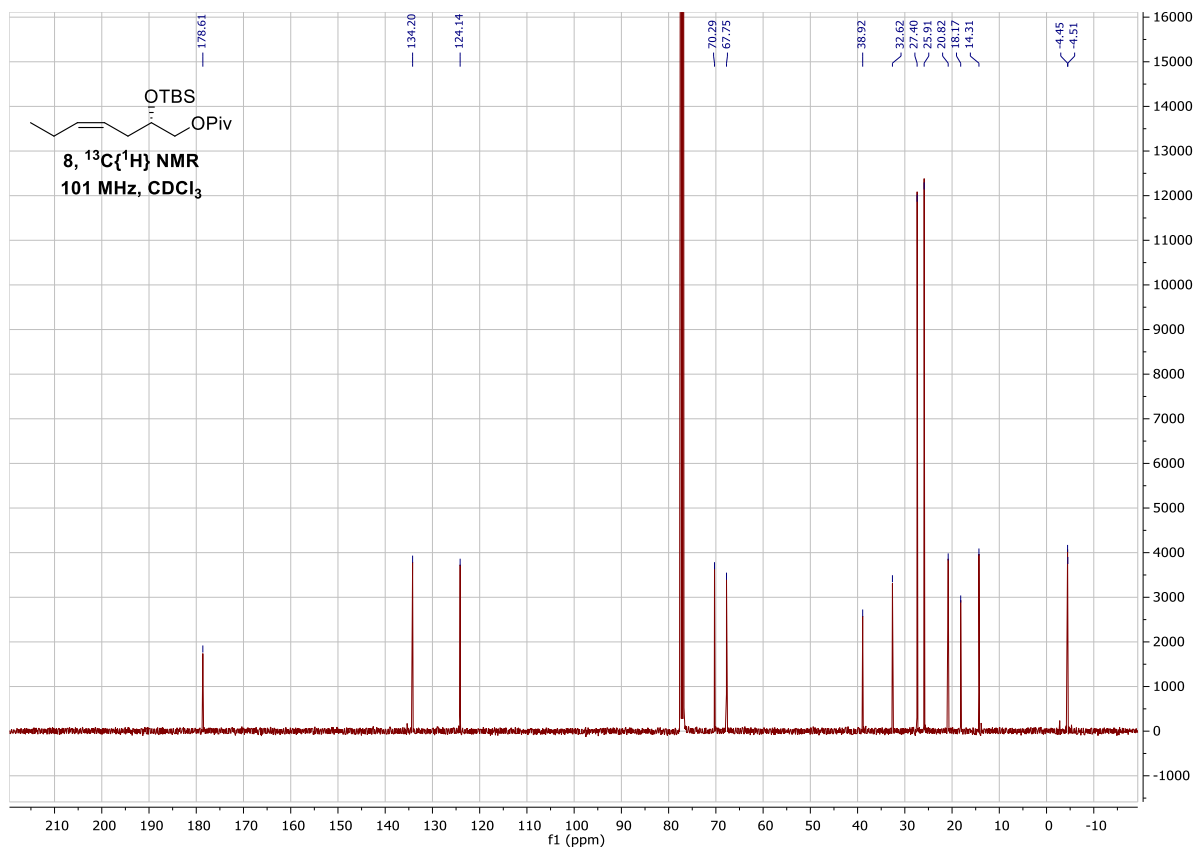

Figure S-6 <sup>13</sup>C-NMR spectrum of compound **8**.

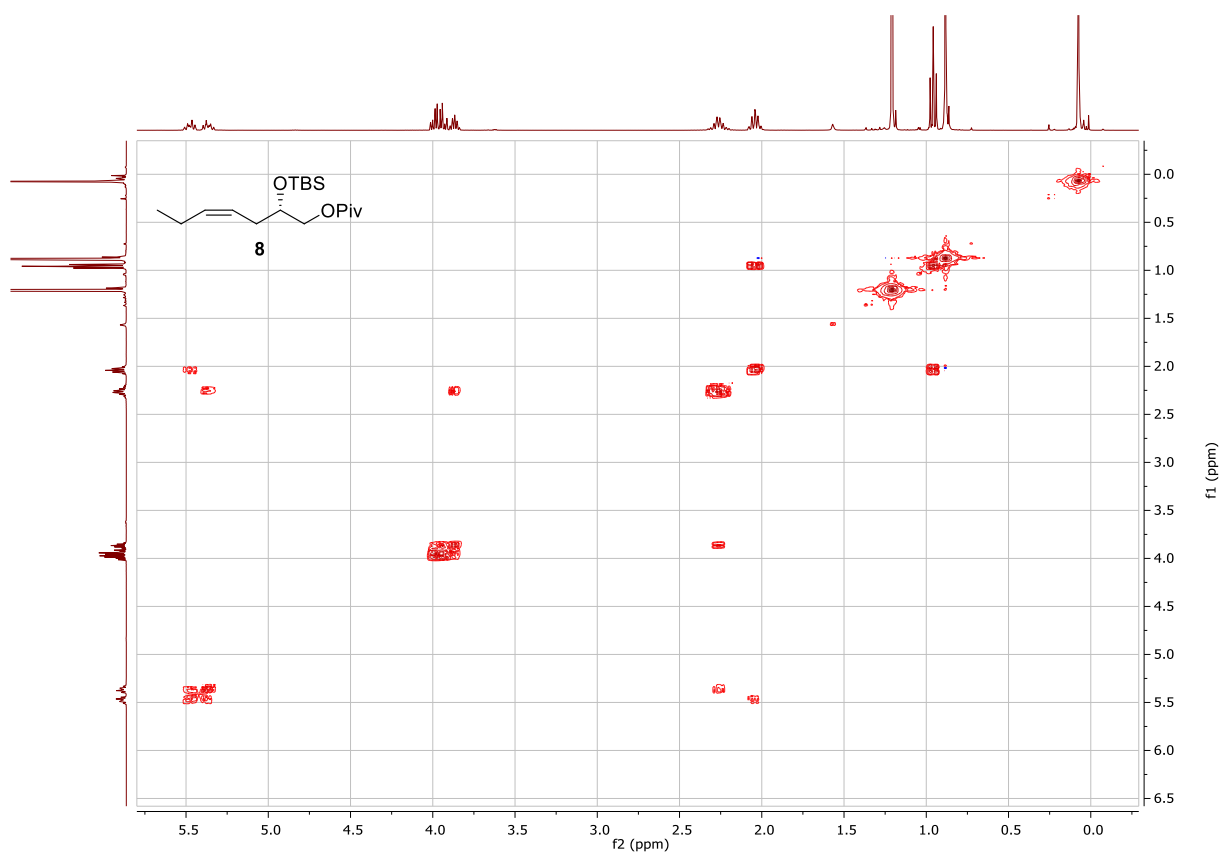

Figure S-7 COSY-spectrum of compound 8.

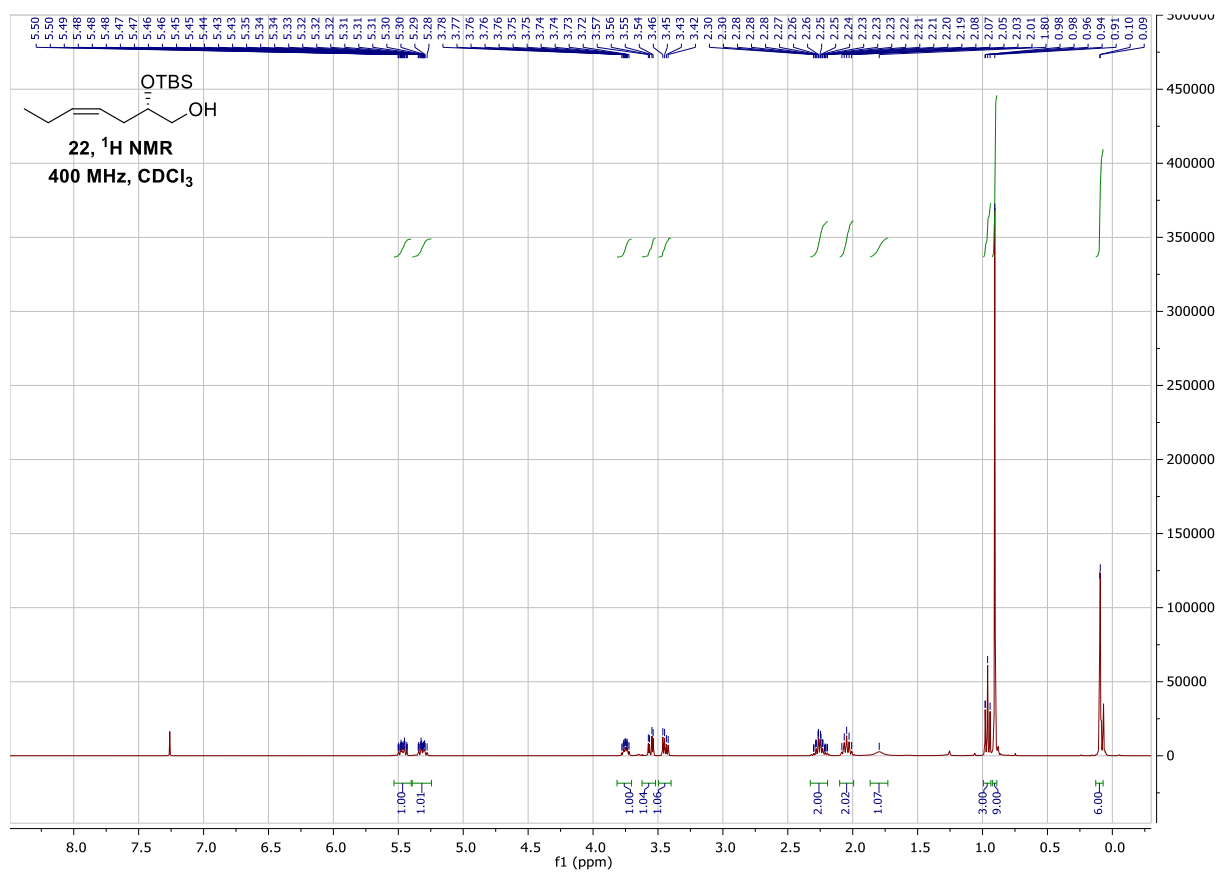

Figure S-8 <sup>1</sup>H-NMR spectrum of compound 22.

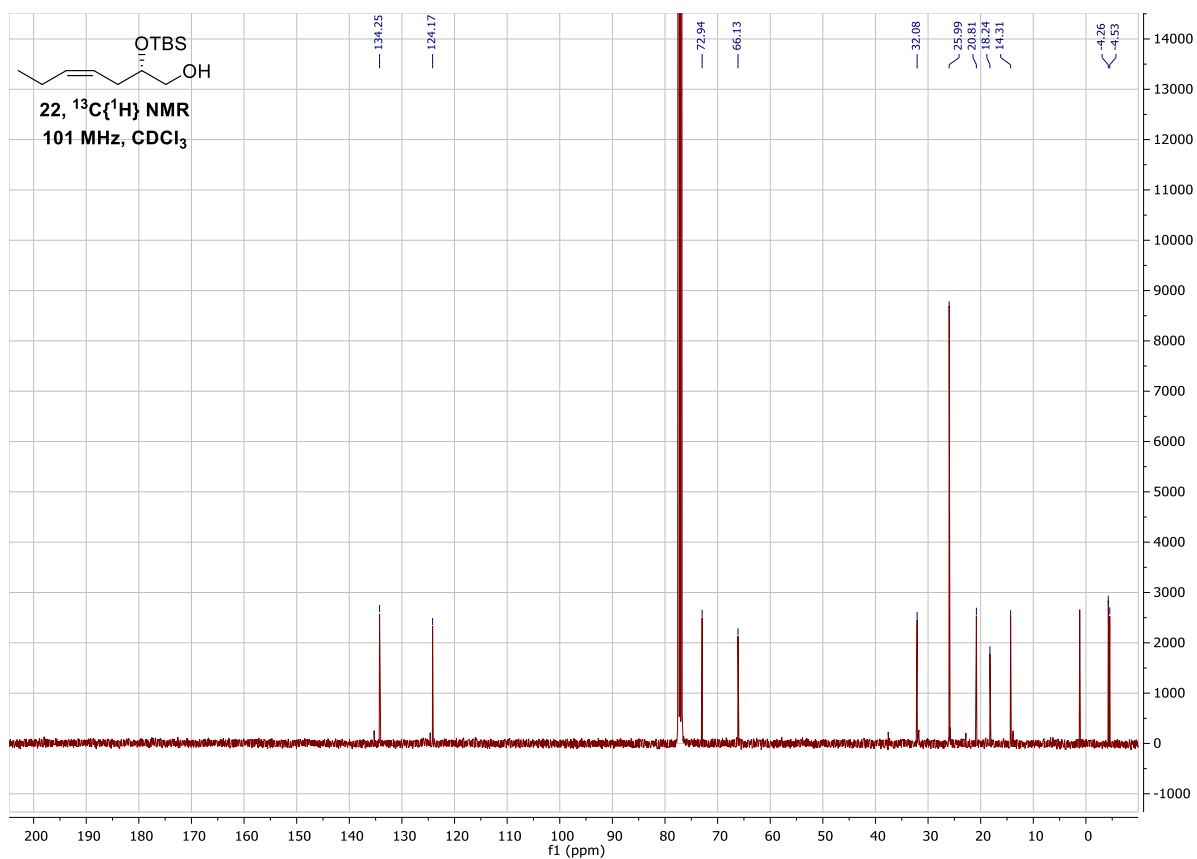

**Figure S-9**  $^{13}\text{C}$ -NMR spectrum of compound **22**.

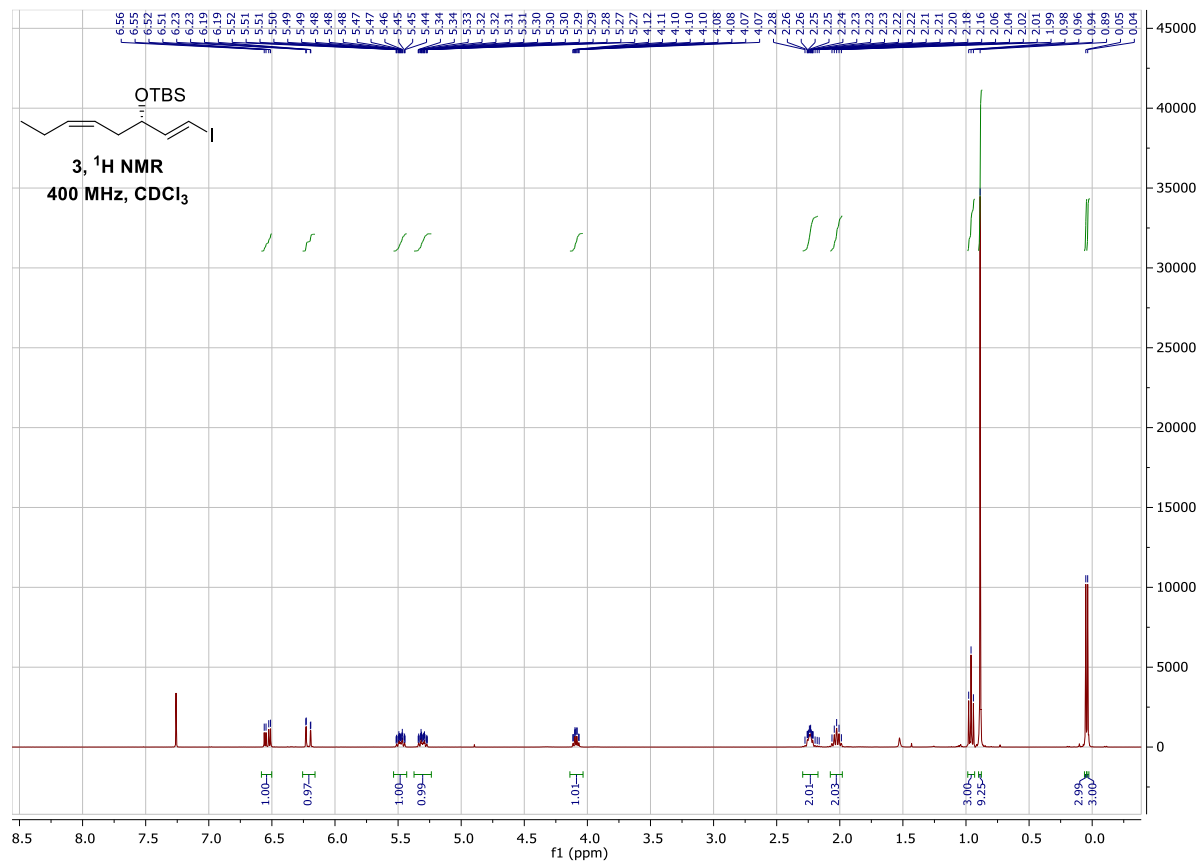

**Figure S-10**  $^1\text{H}$ -NMR spectrum of compound **3**.

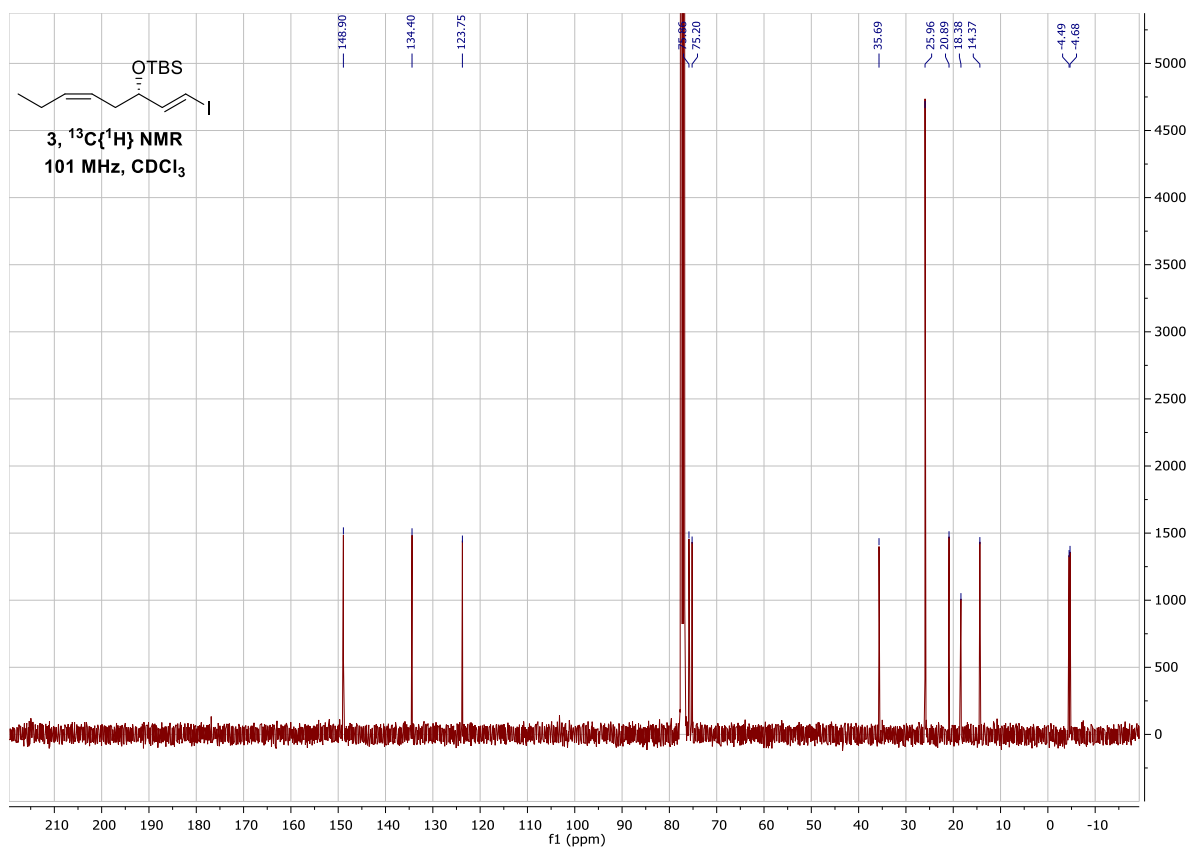

Figure S-11  $^{13}\text{C}$ -NMR spectrum of compound 3.

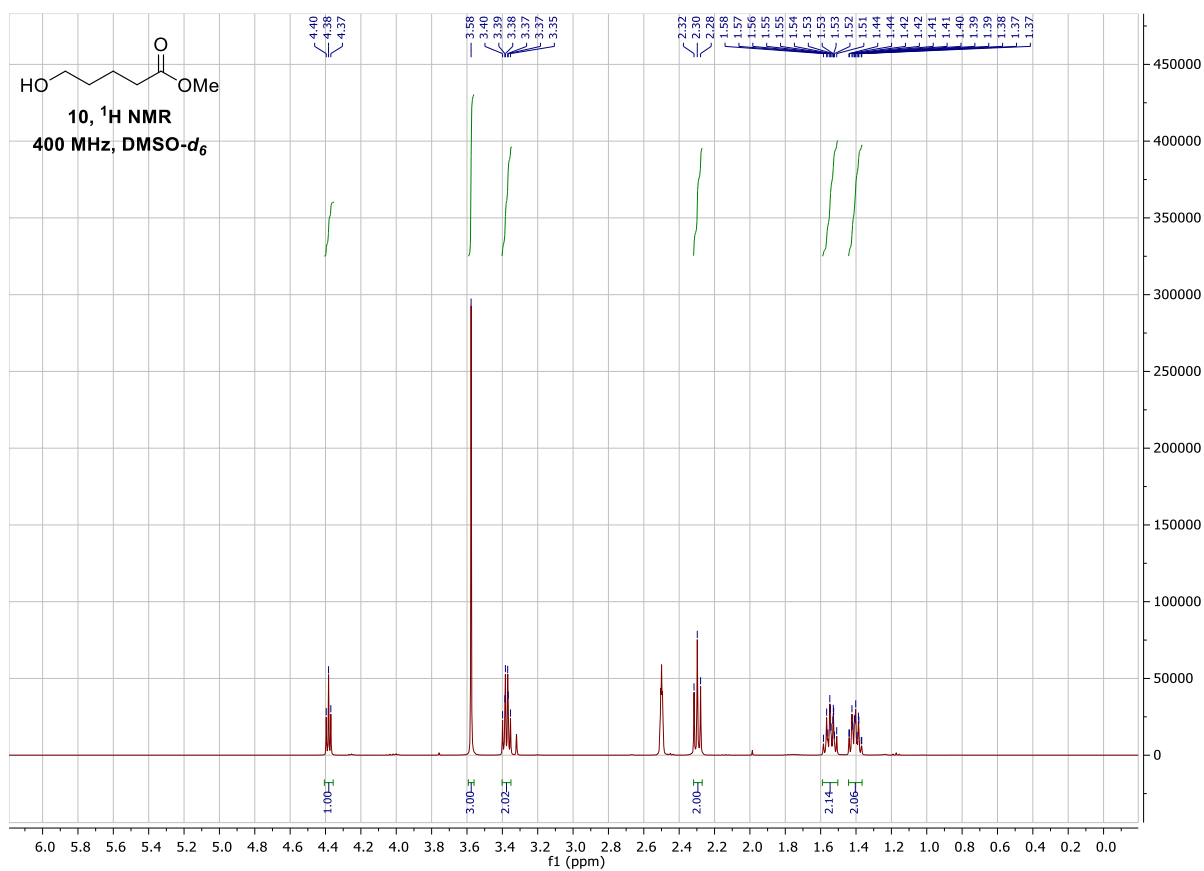

Figure S-12  $^1\text{H}$ -NMR spectrum of compound 10.

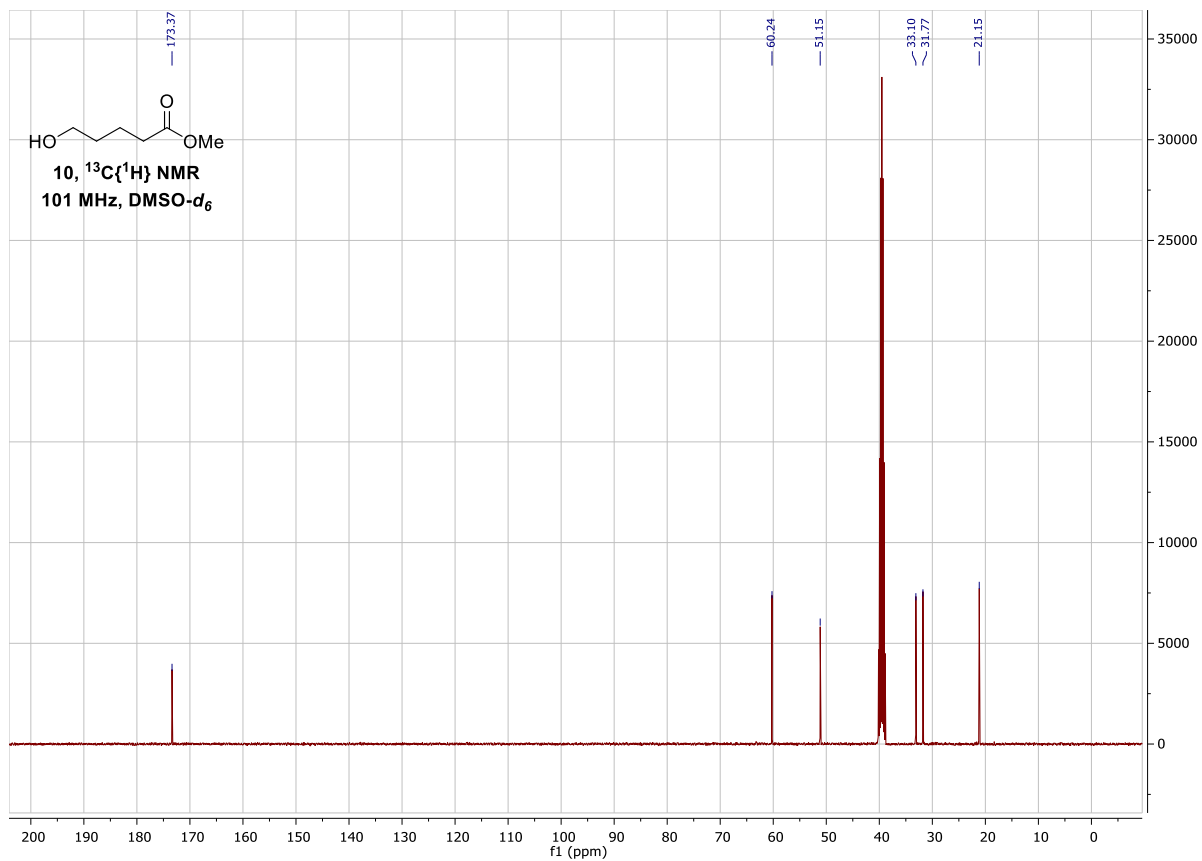

**Figure S-13**  $^{13}\text{C}$ -NMR spectrum of compound **10**.

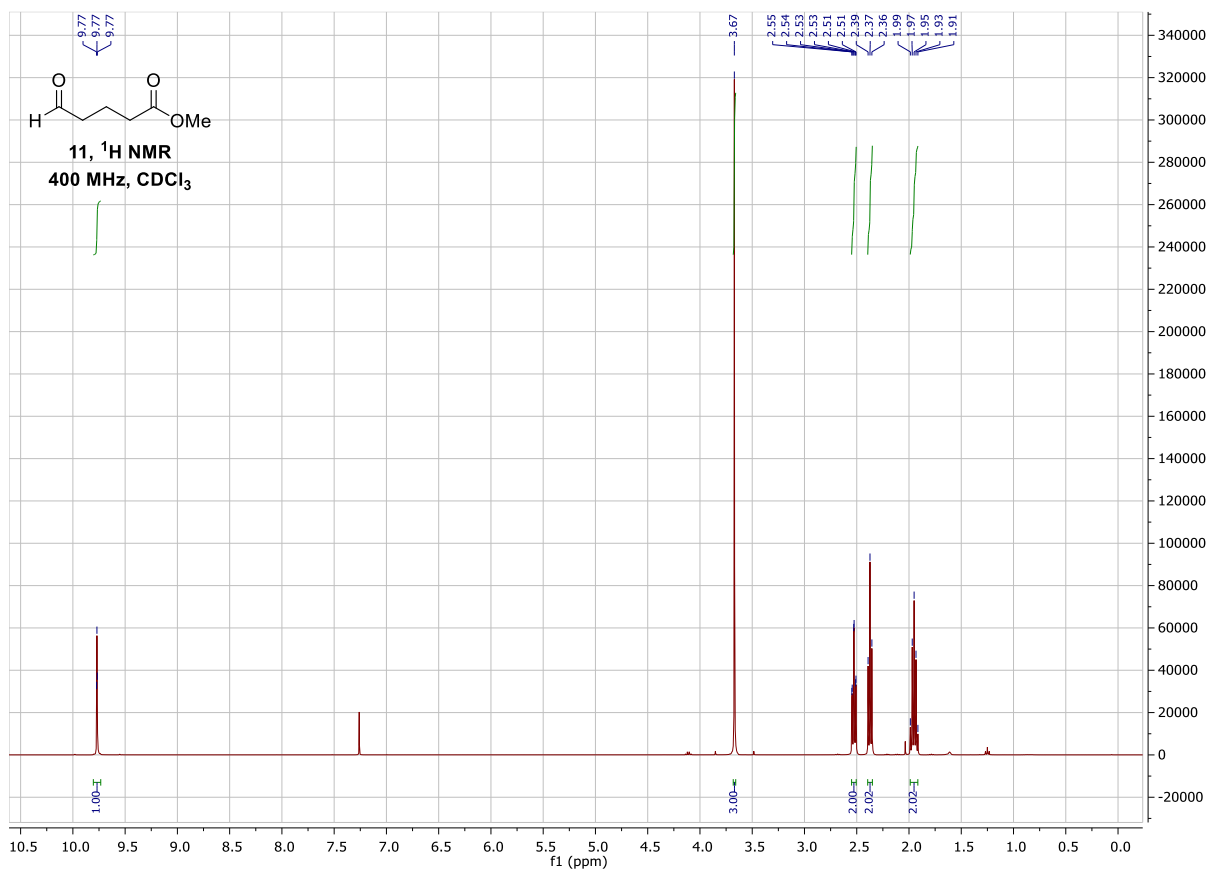

**Figure S-14**  $^1\text{H}$ -NMR spectrum of compound **11**.



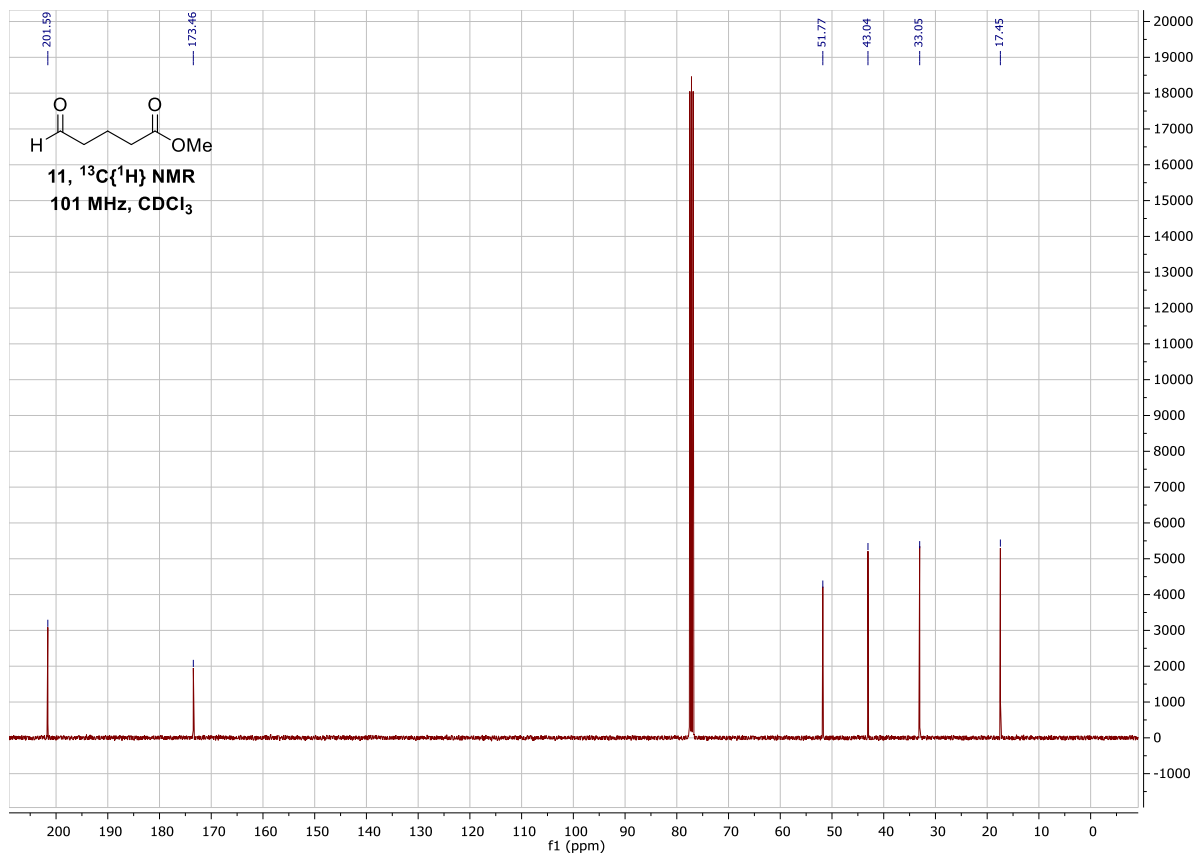

Figure S-15  $^{13}\text{C}$ -NMR spectrum of compound 11.

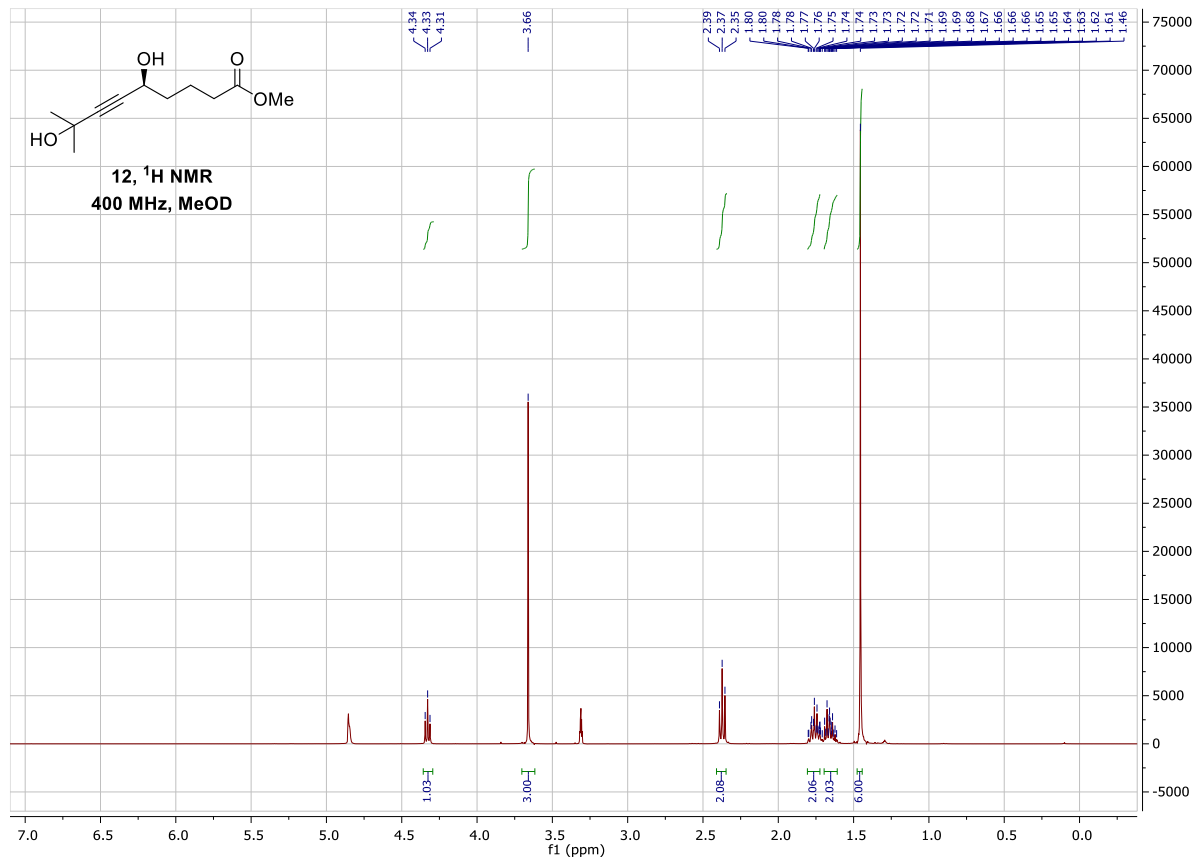

Figure S-16  $^1\text{H}$ -NMR spectrum of compound 12.

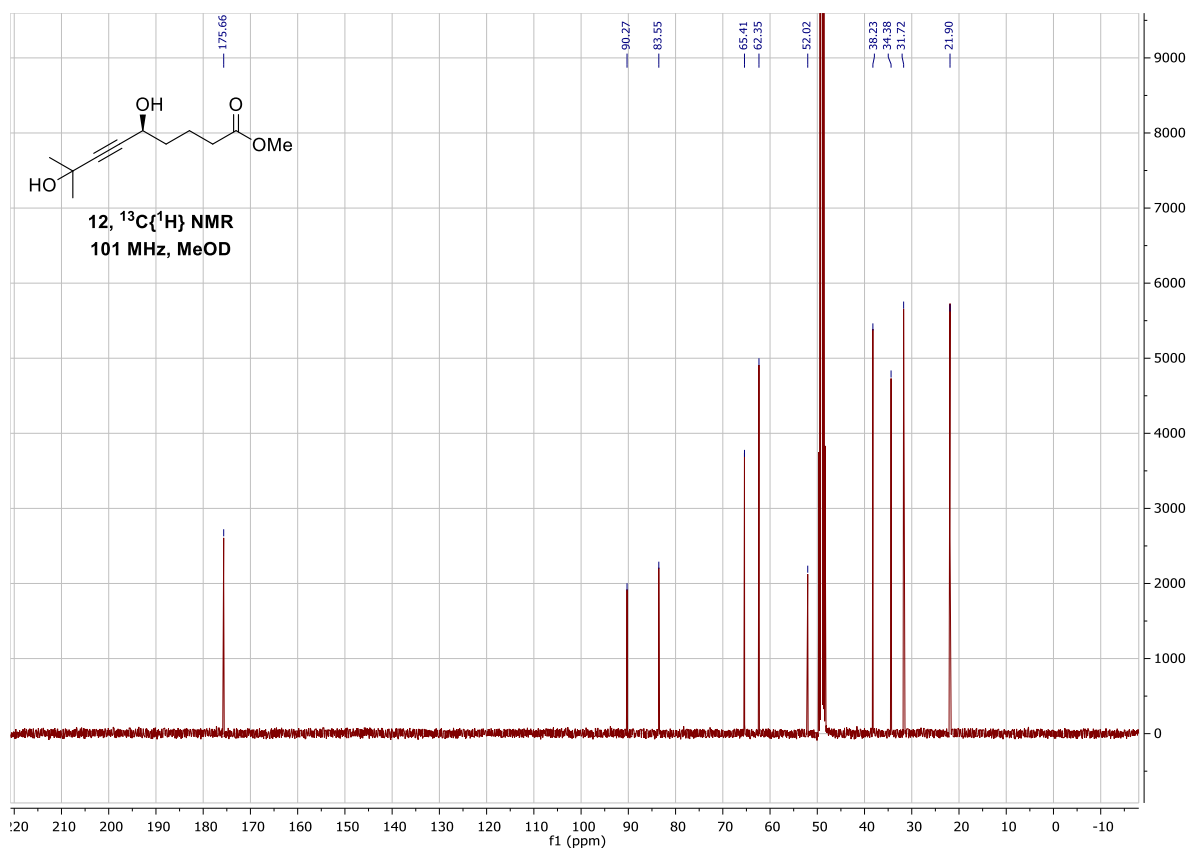

Figure S-17  $^{13}\text{C}$ -NMR spectrum of compound 12.

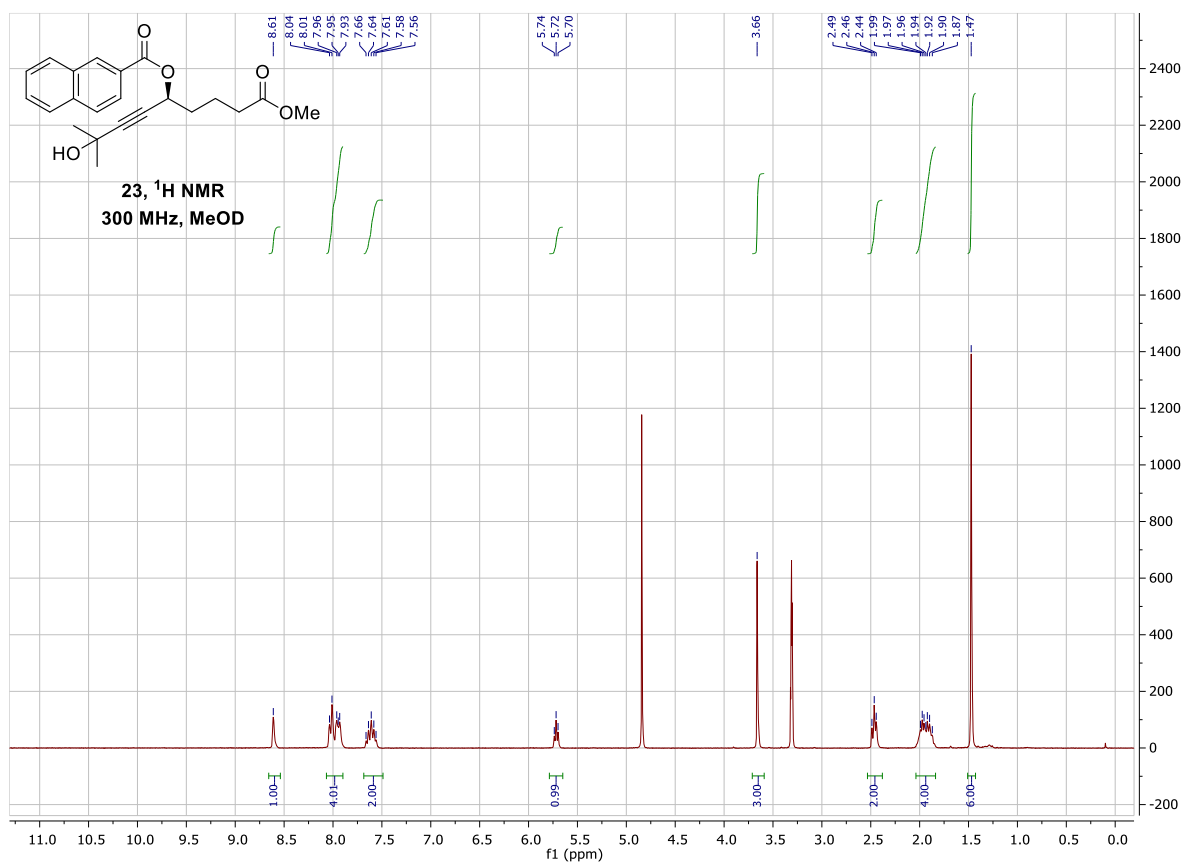

Figure S-18  $^1\text{H}$ -NMR spectrum of compound 23.

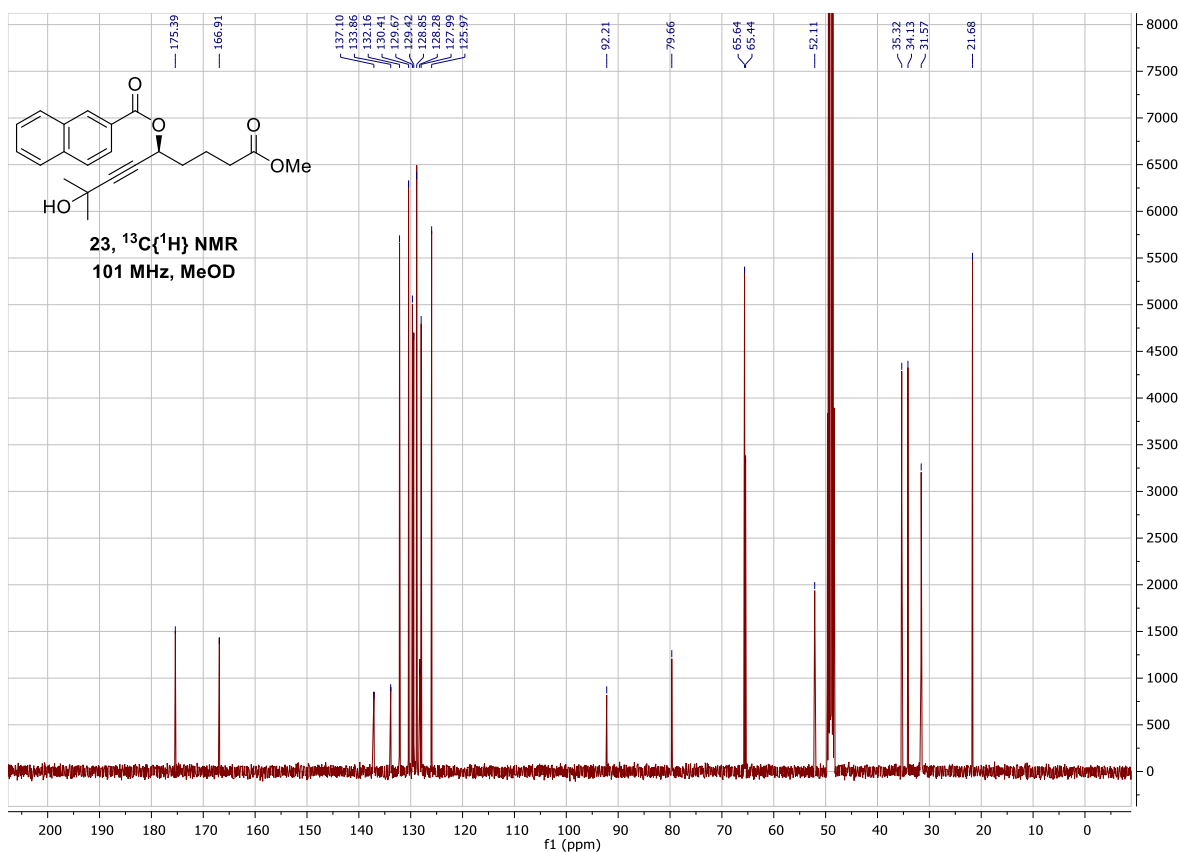

Figure S-19  $^{13}\text{C}$ -NMR spectrum of compound 23.

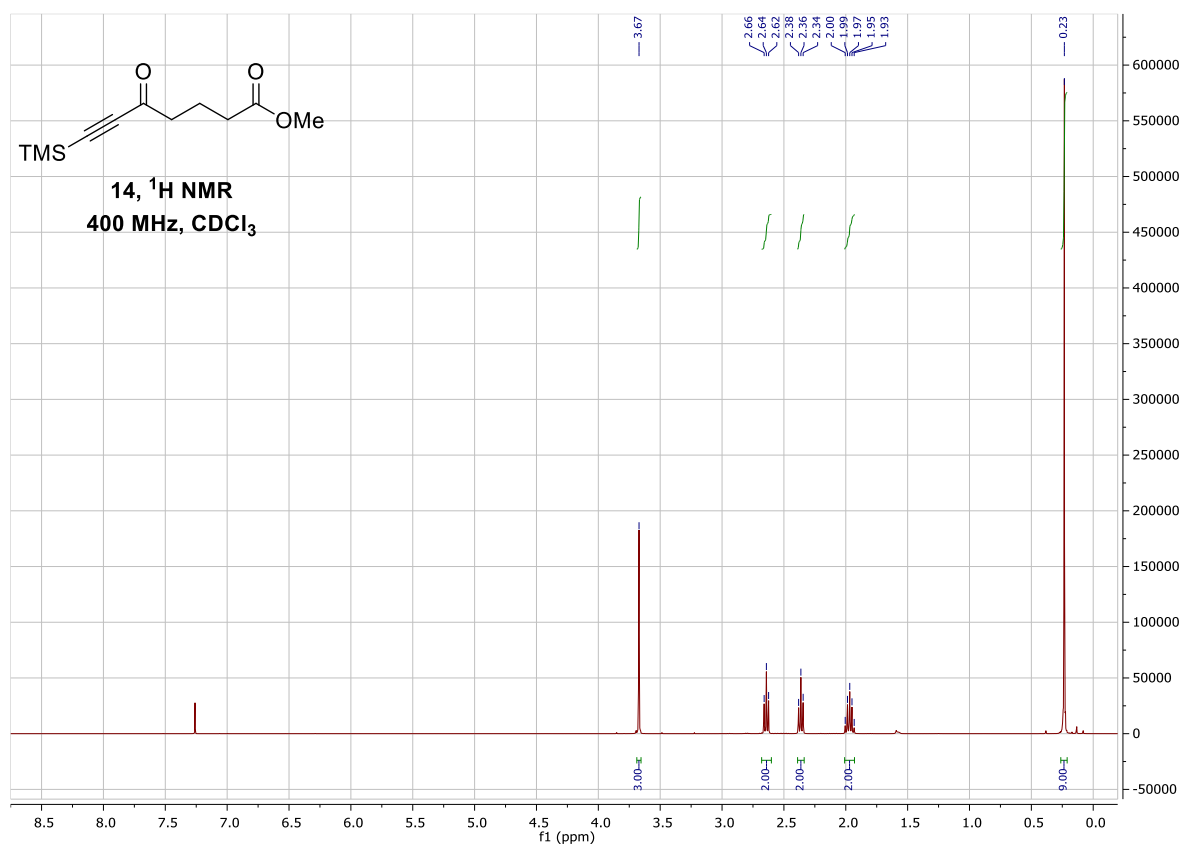

Figure S-20  $^1\text{H}$ -NMR spectrum of compound 14.

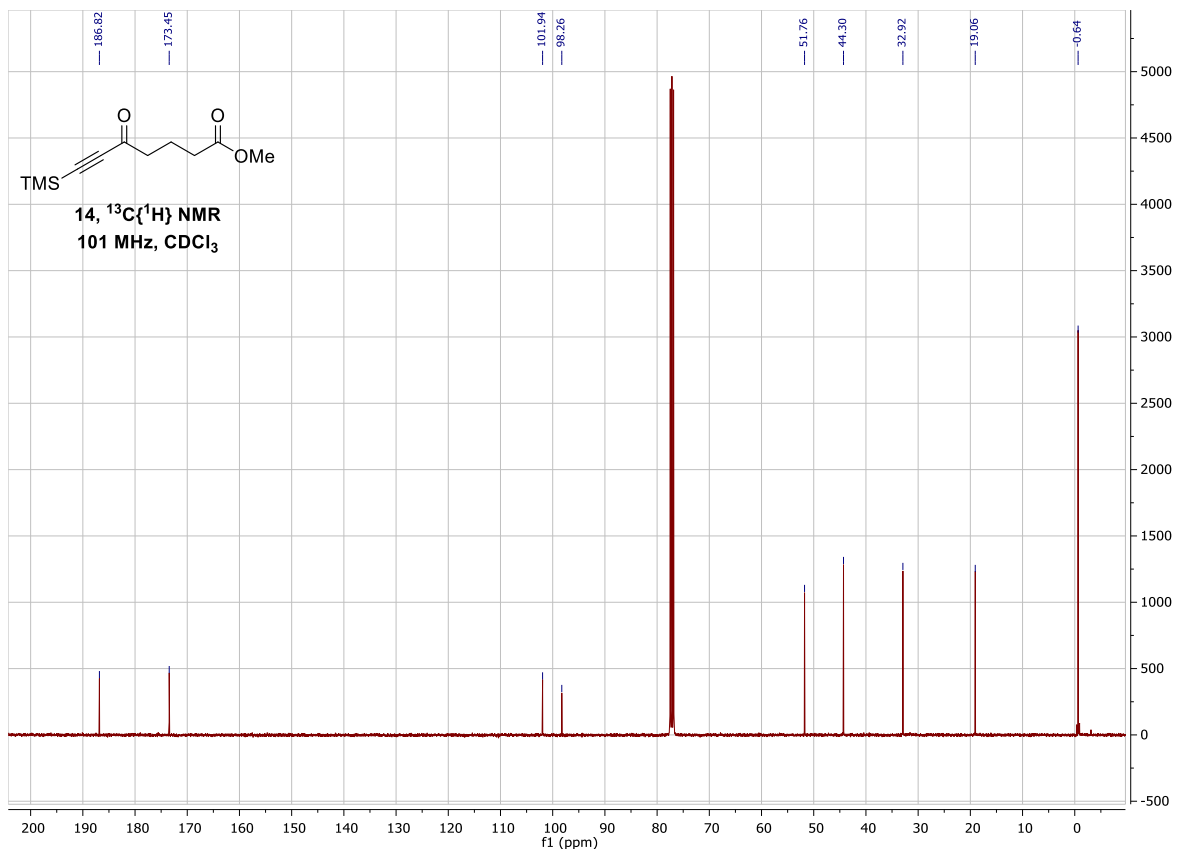

Figure S-21  $^{13}\text{C}$ -NMR spectrum of compound 14.

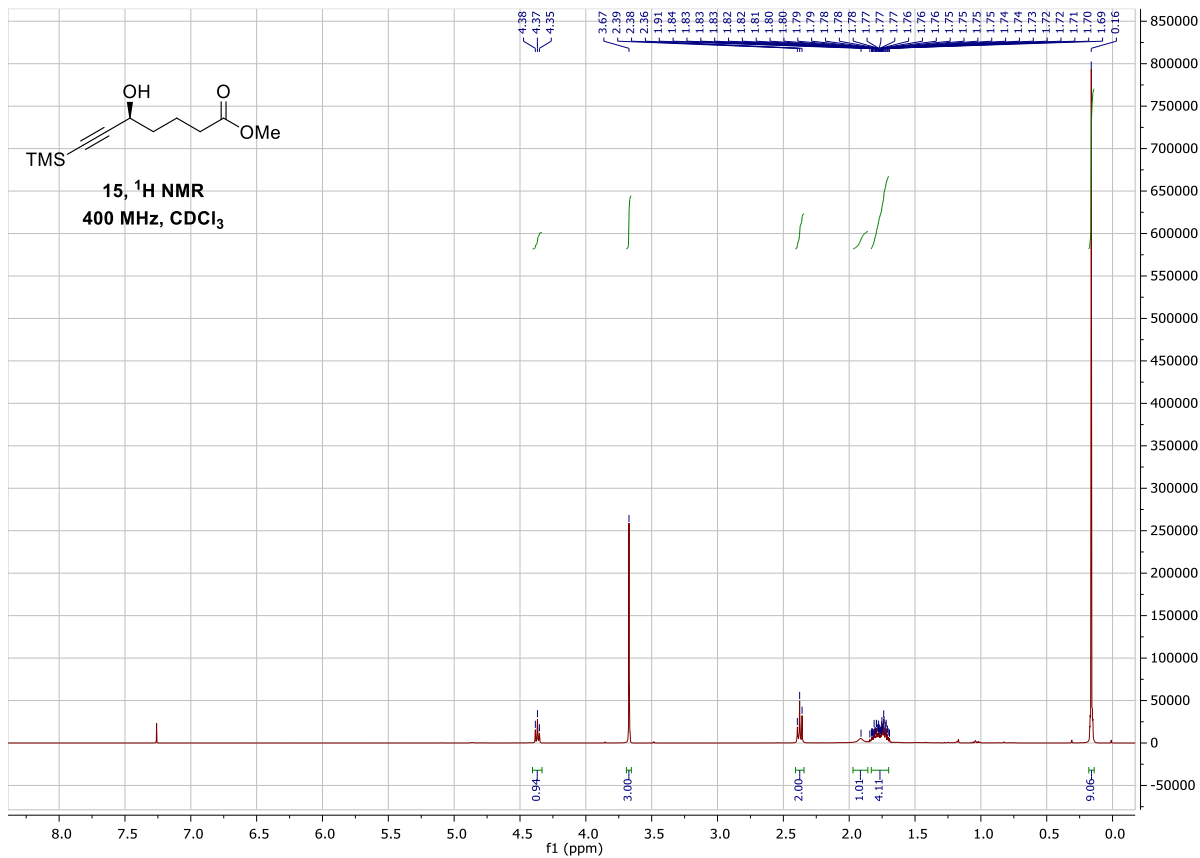

Figure S-22  $^1\text{H}$ -NMR spectrum of compound 15.

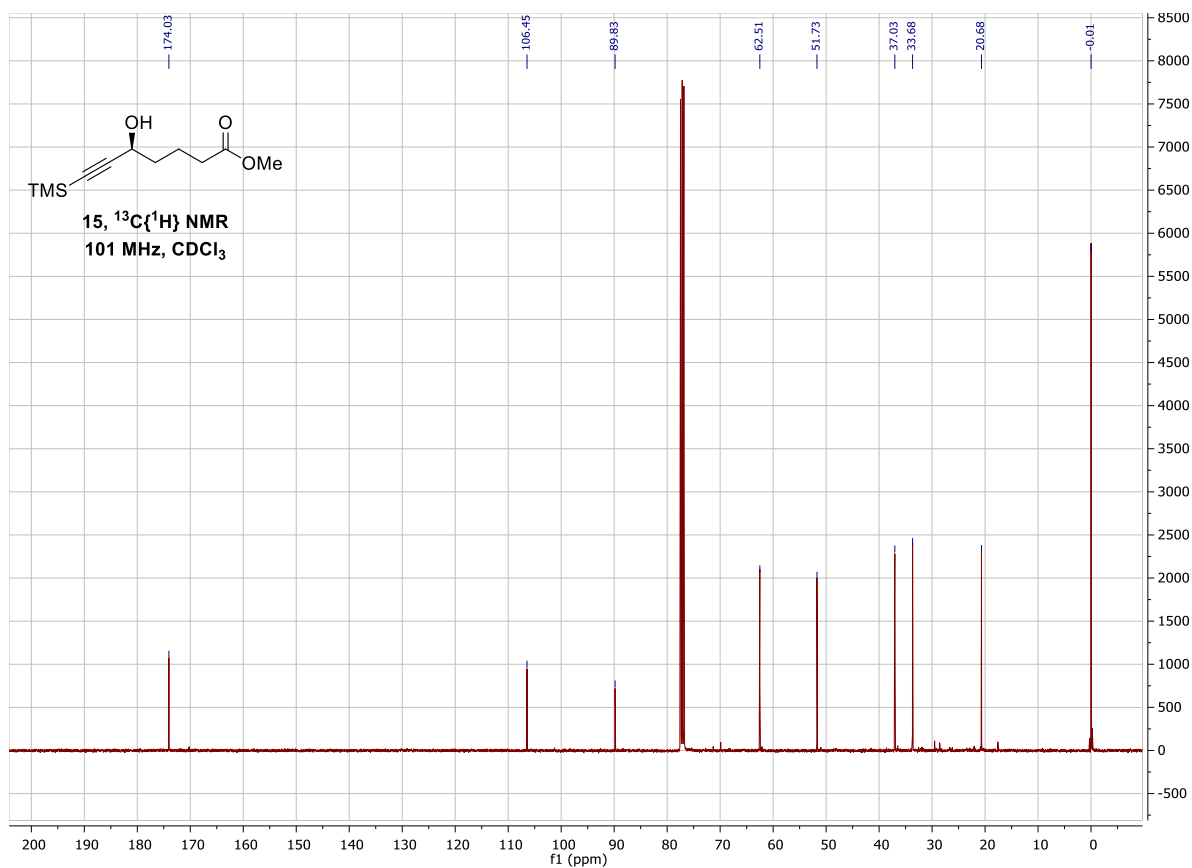

Figure S-23  $^{13}\text{C}$ -NMR spectrum of compound 15.

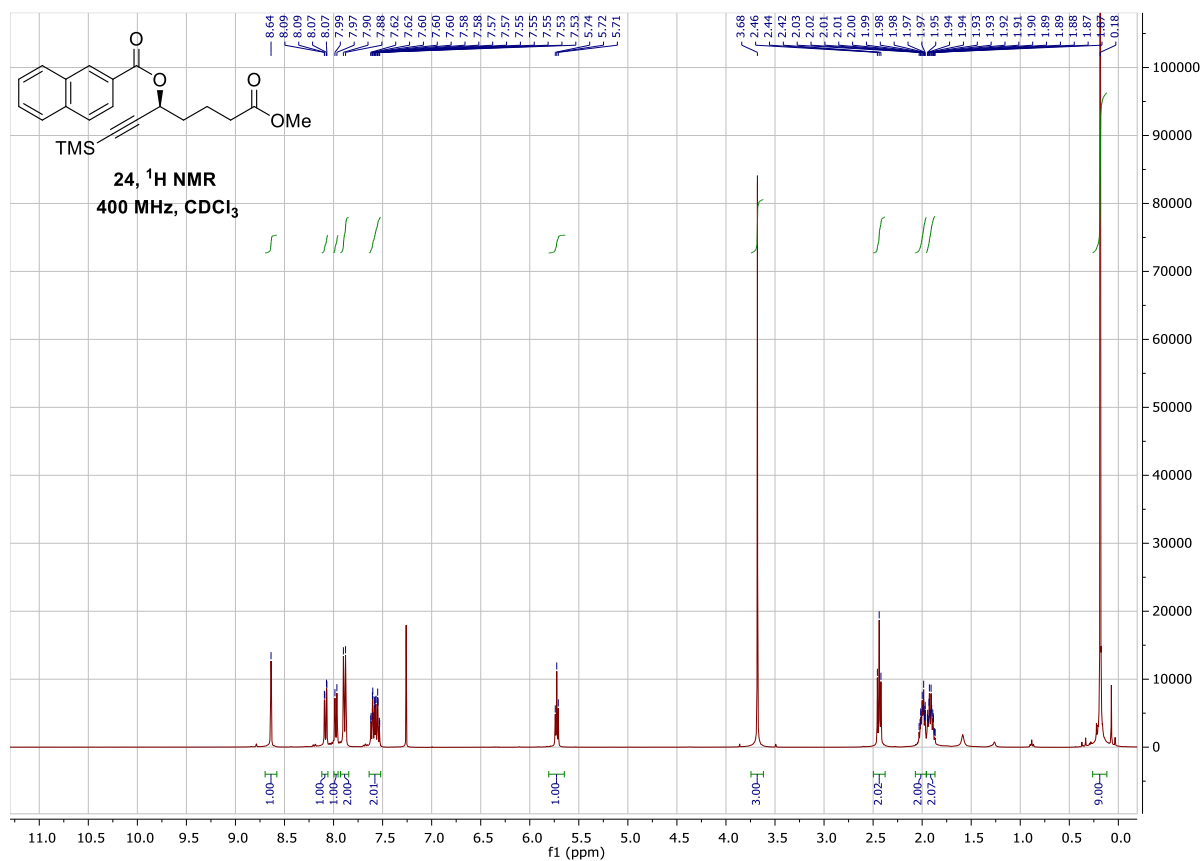

Figure S-24  $^1\text{H}$ -NMR spectrum of compound 24.



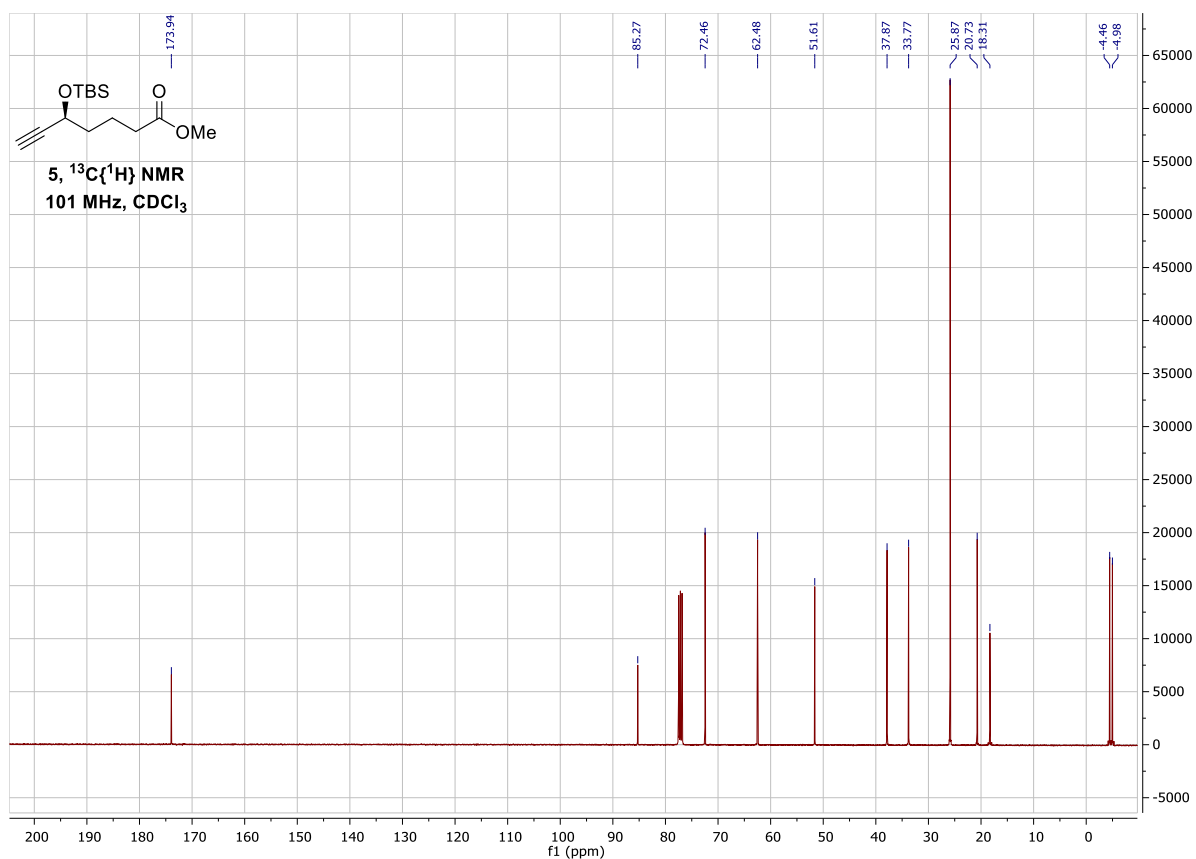

Figure S-27  $^{13}\text{C}$ -NMR spectrum of compound 5.

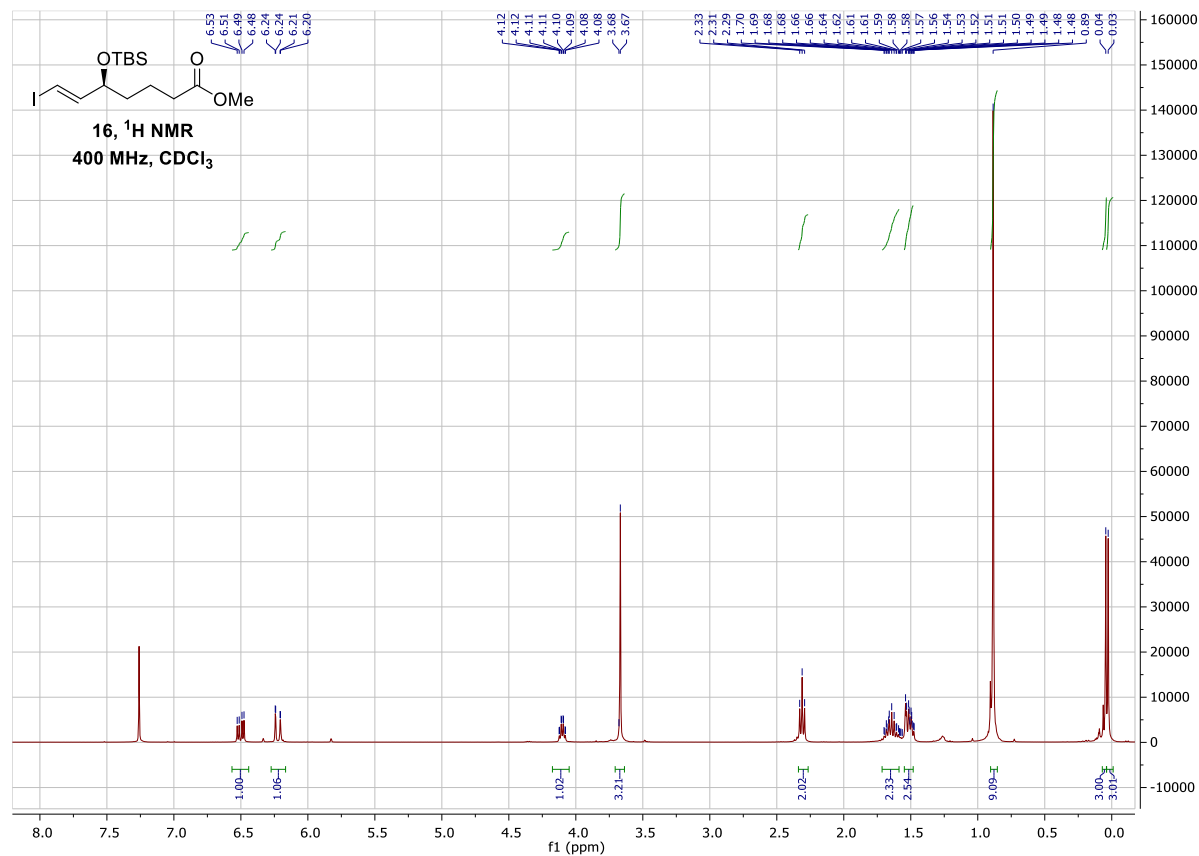

Figure S-28  $^1\text{H}$ -NMR spectrum of compound 16.

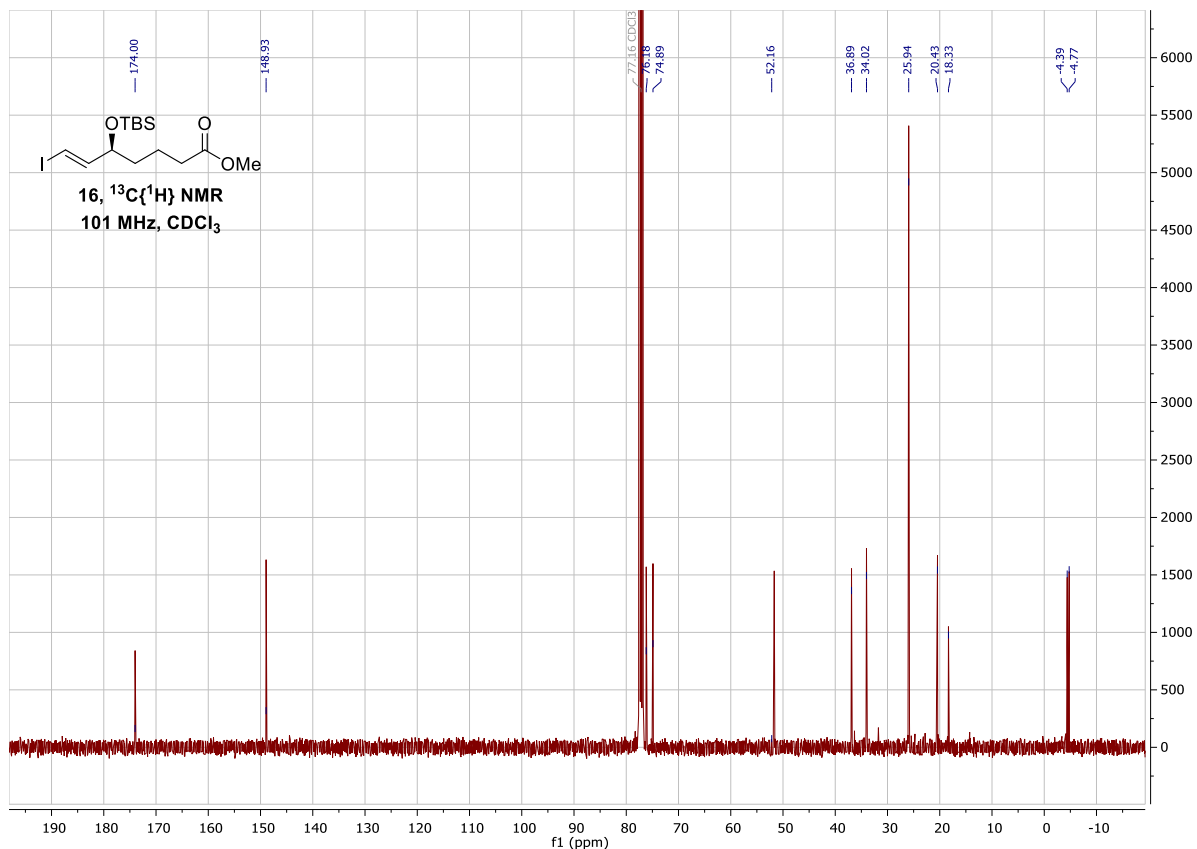

Figure S-29  $^{13}\text{C}$ -NMR spectrum of compound 16.

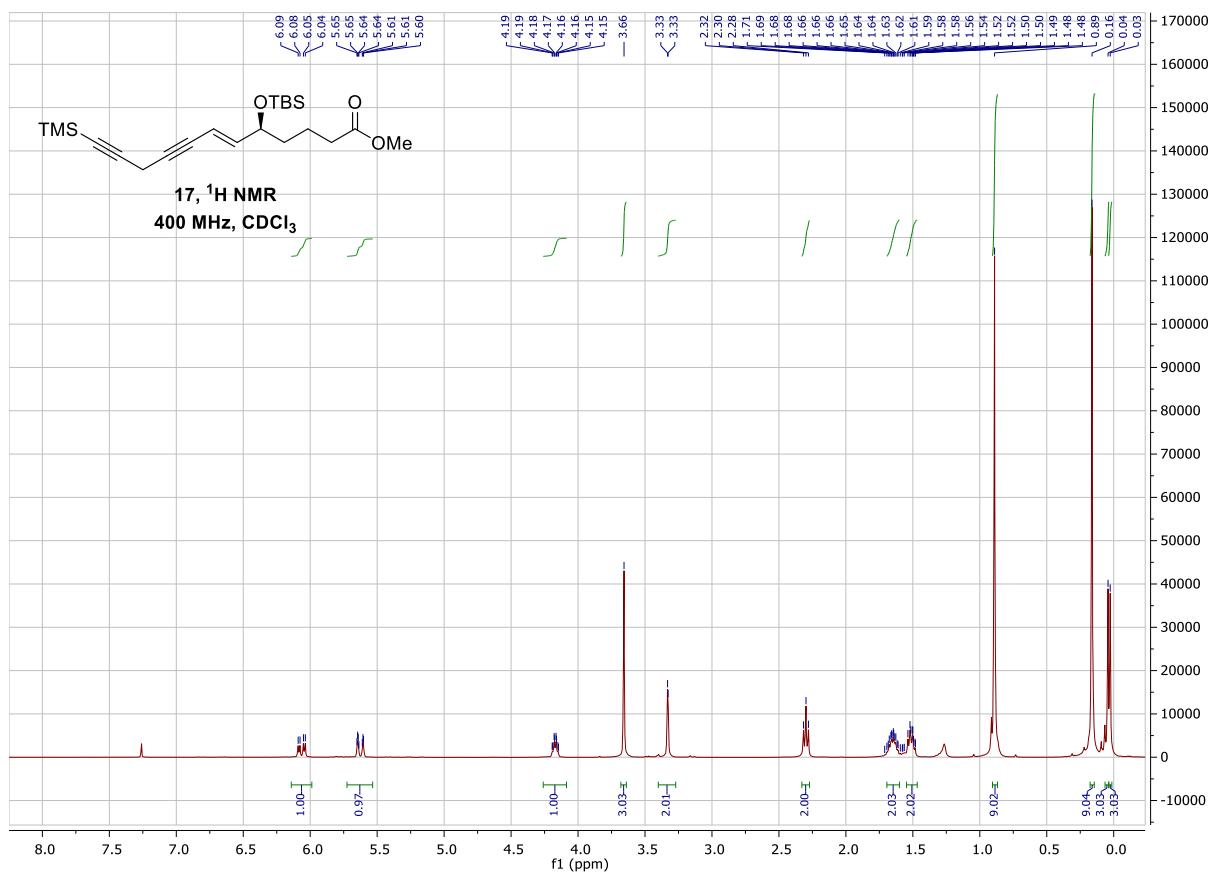

Figure S-30  $^1\text{H}$ -NMR spectrum of compound 17.



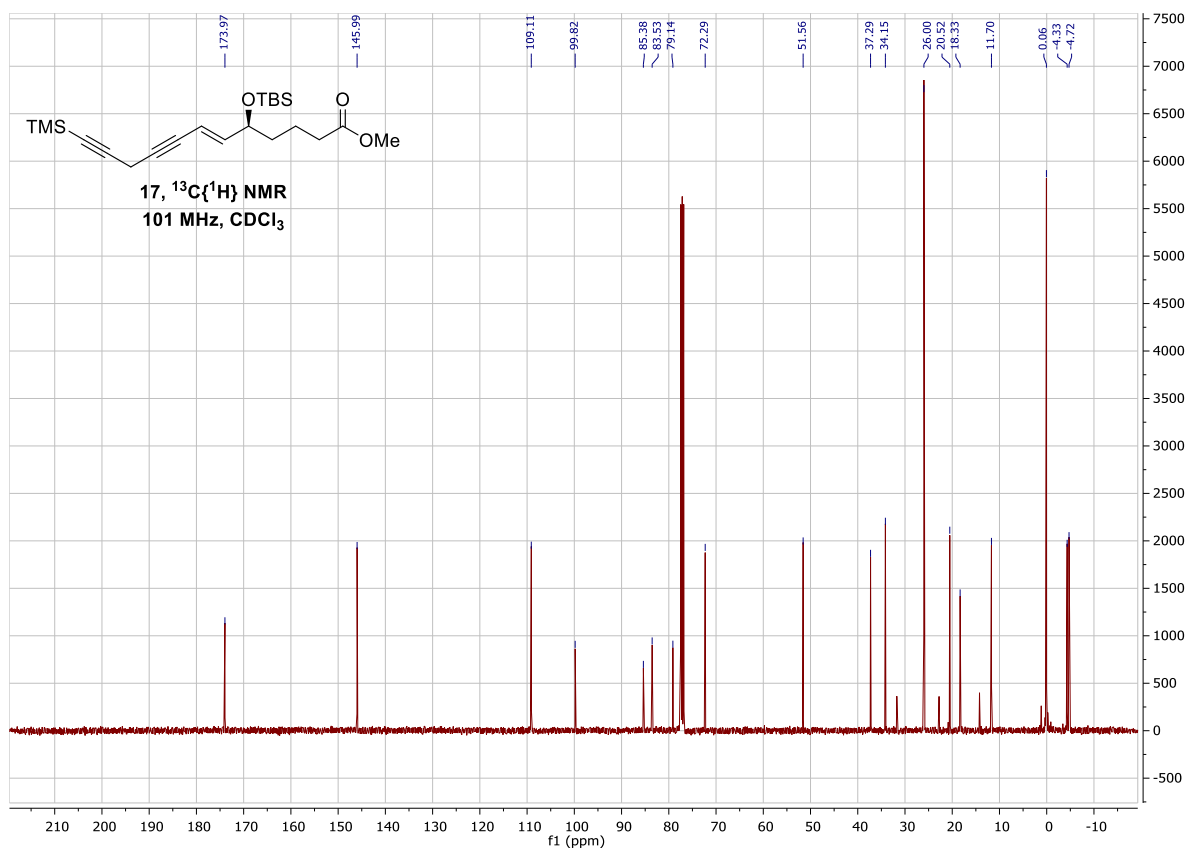

Figure S-31  $^{13}\text{C}$ -NMR spectrum of compound 17.

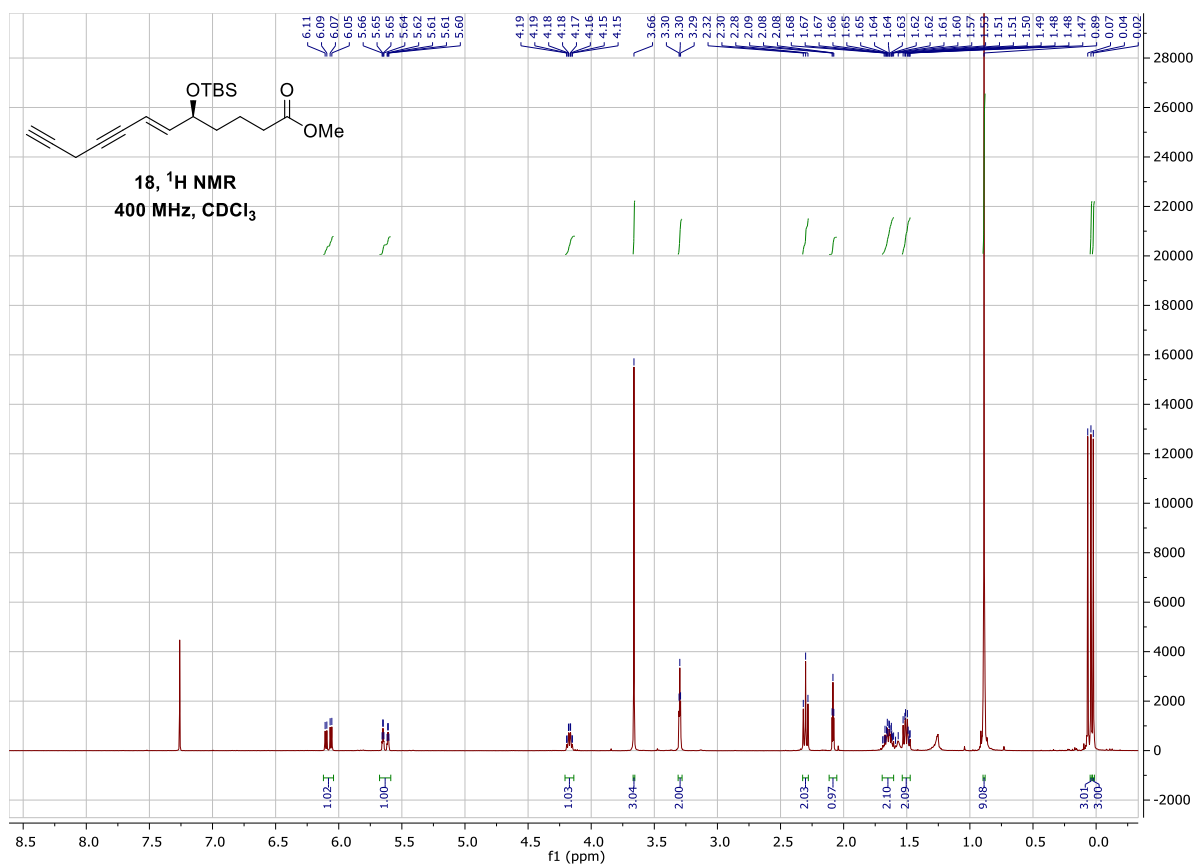

Figure S-32  $^1\text{H}$ -NMR spectrum of compound 18.

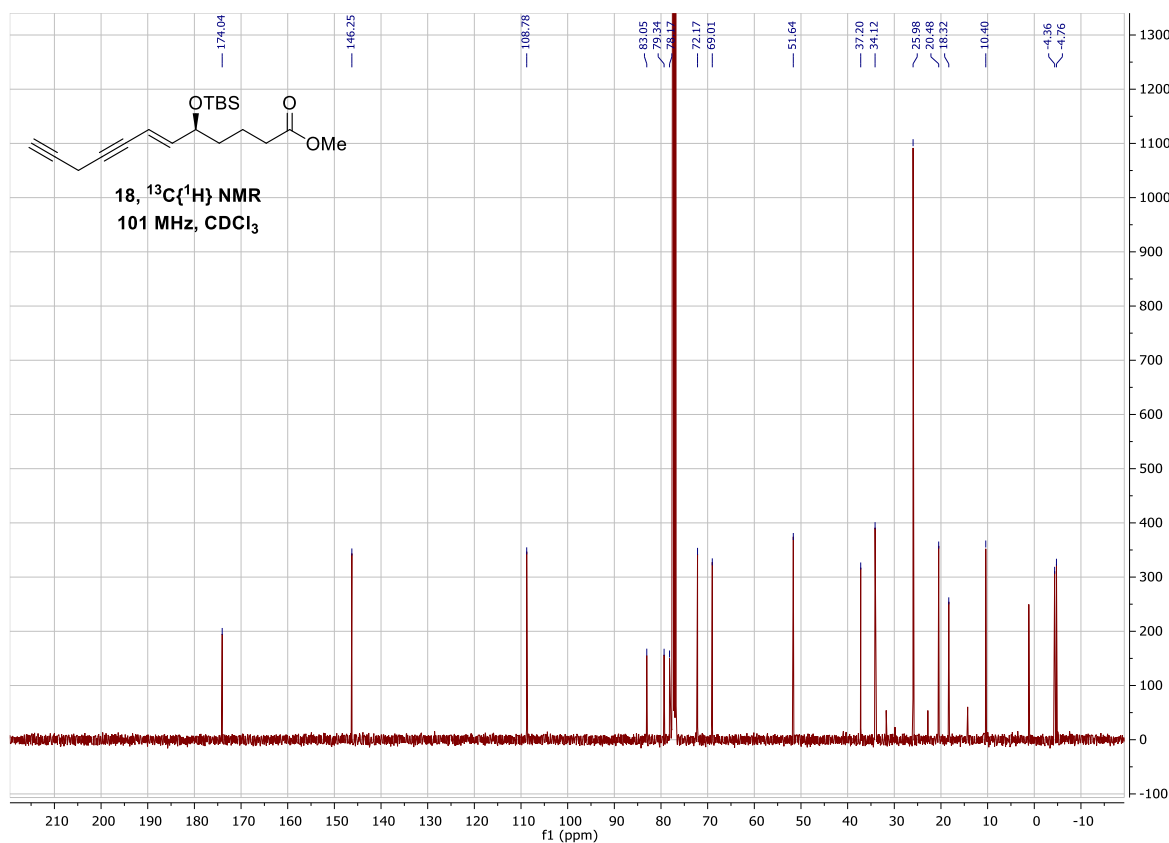

Figure S-33  $^{13}\text{C}$ -NMR spectrum of compound 18.

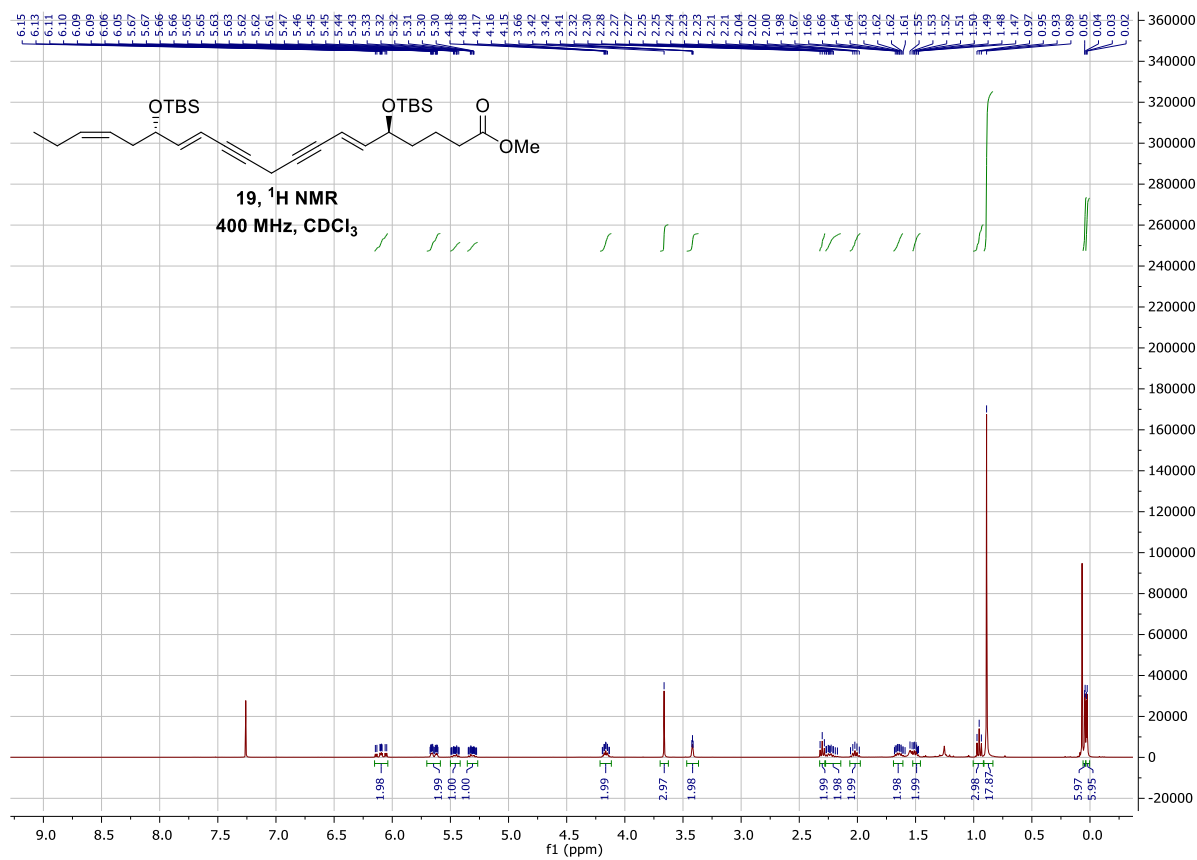

Figure S-34  $^1\text{H}$ -NMR spectrum of compound 19.

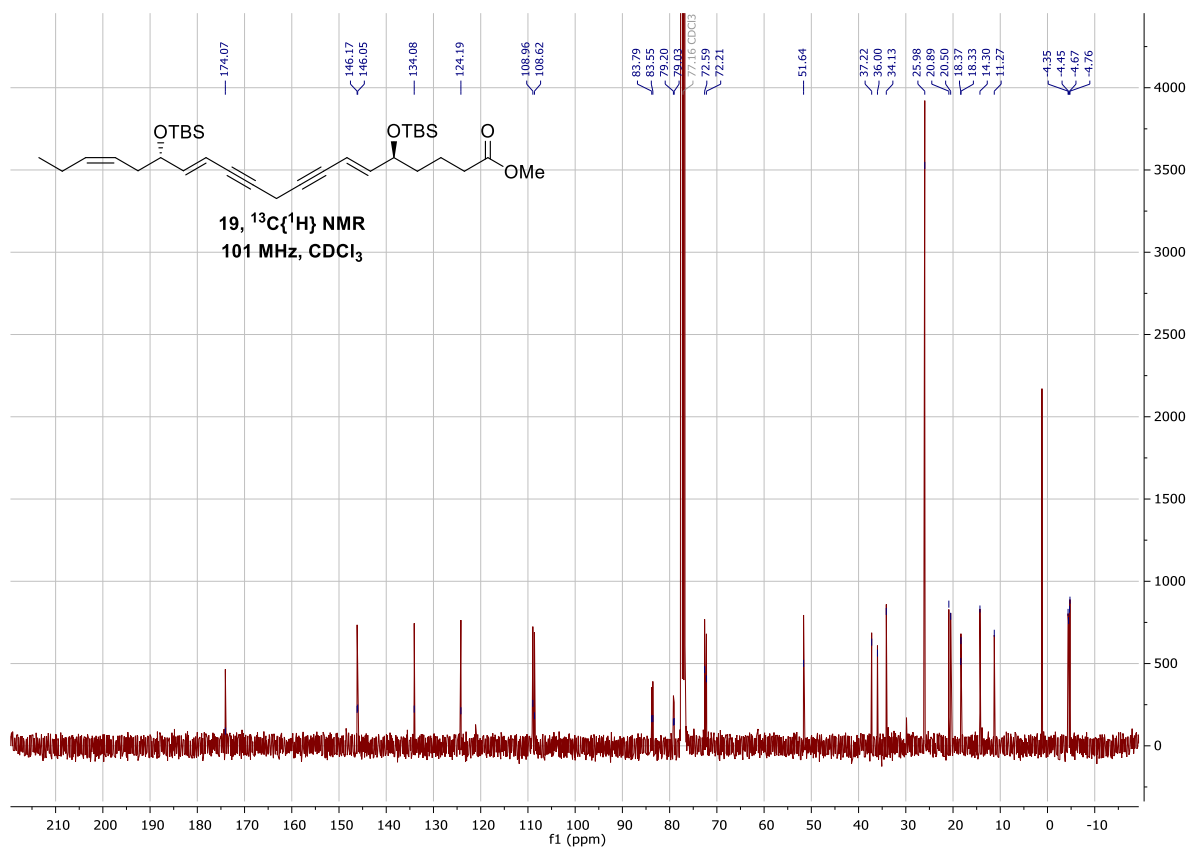

Figure S-35  $^{13}\text{C}$ -NMR spectrum of compound 19.

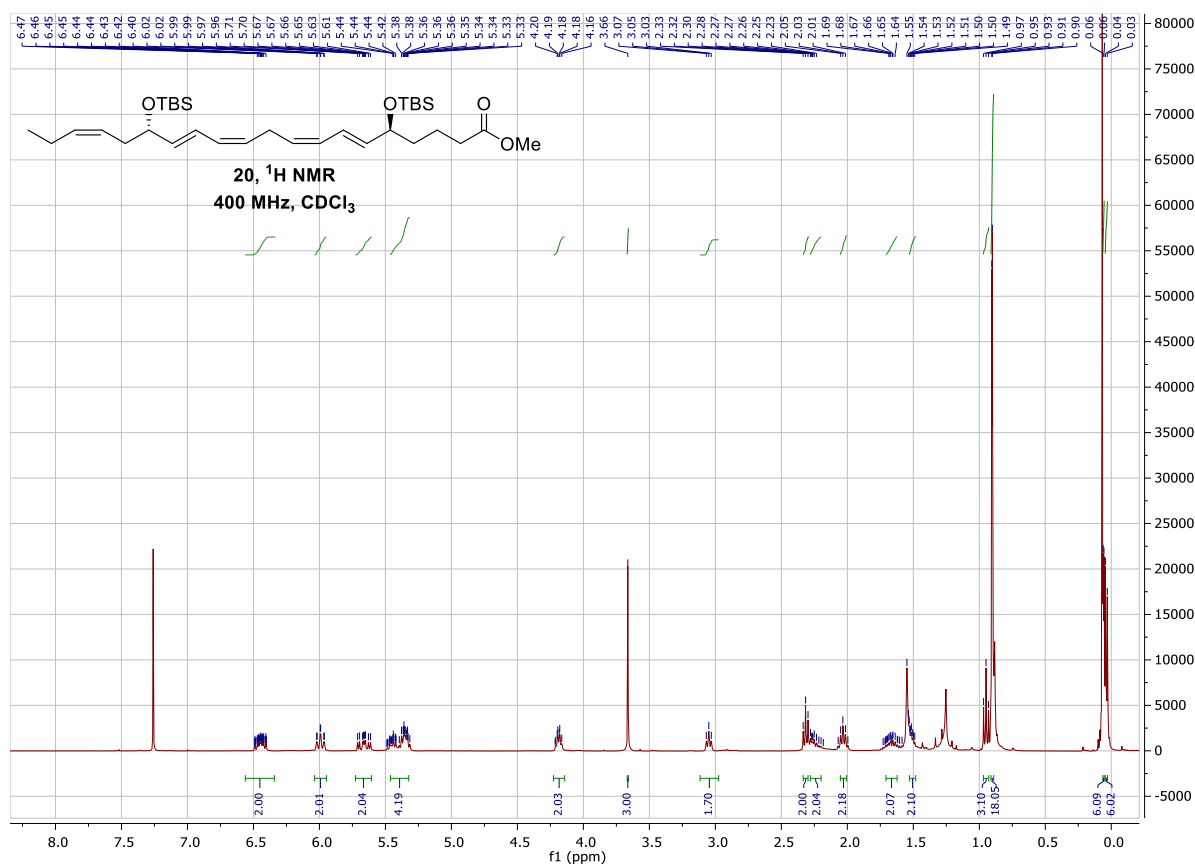

Figure S-36  $^1\text{H}$ -NMR spectrum of compound 20.

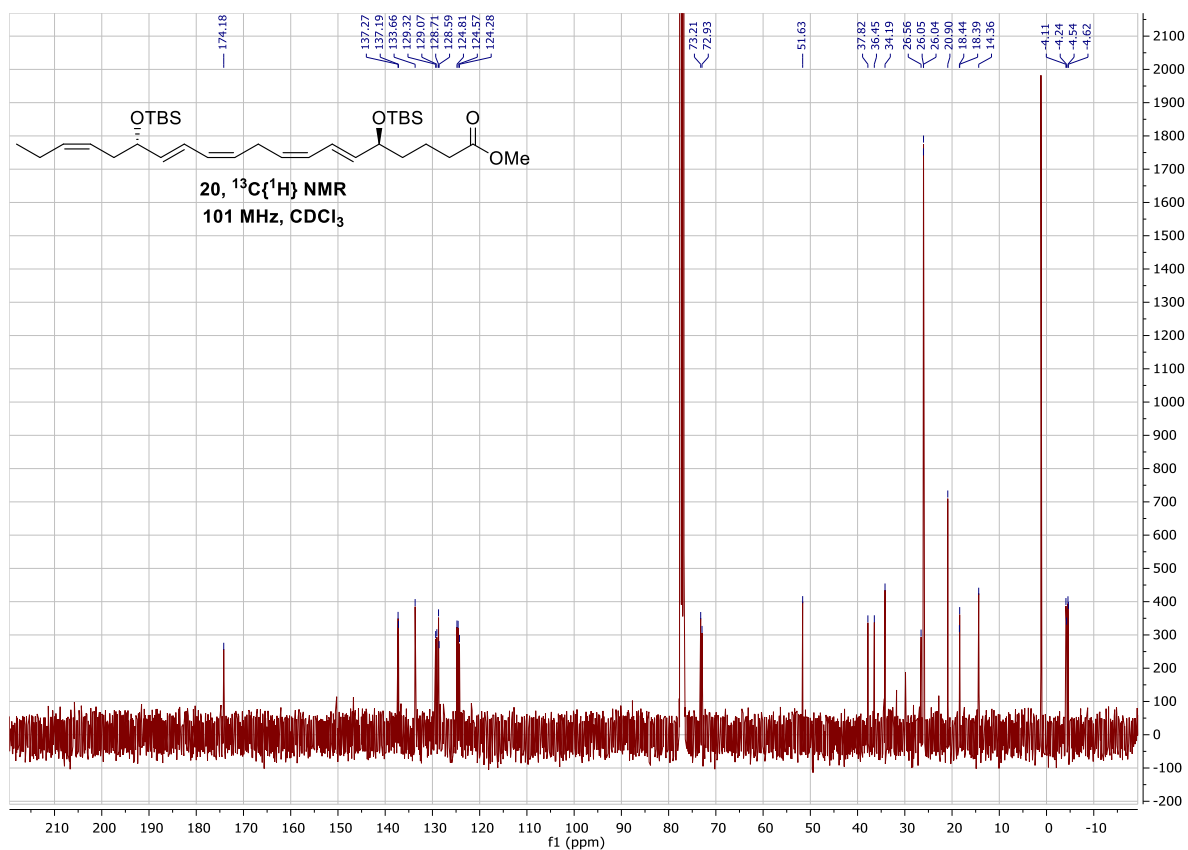

Figure S-37  $^{13}\text{C}$ -NMR spectrum of compound 20.

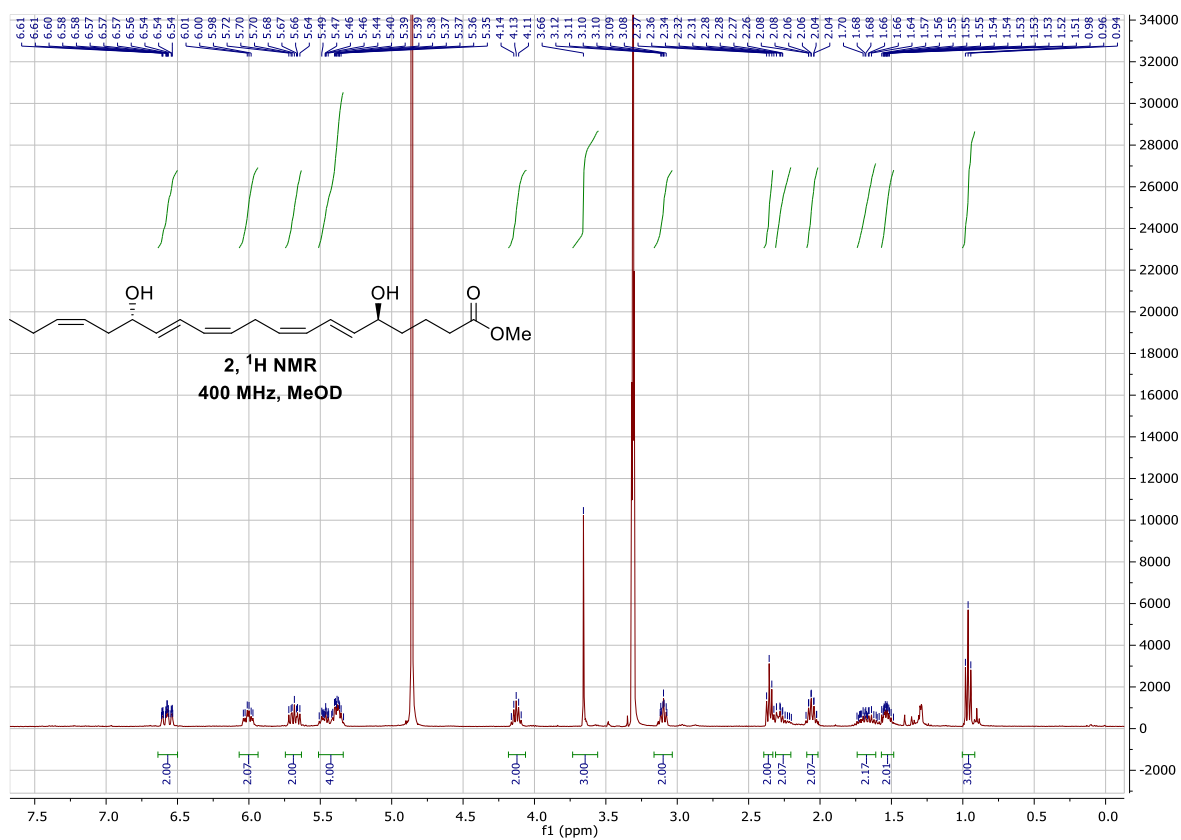

Figure S-38  $^1\text{H}$ -NMR of RvE4 methyl ester (2).

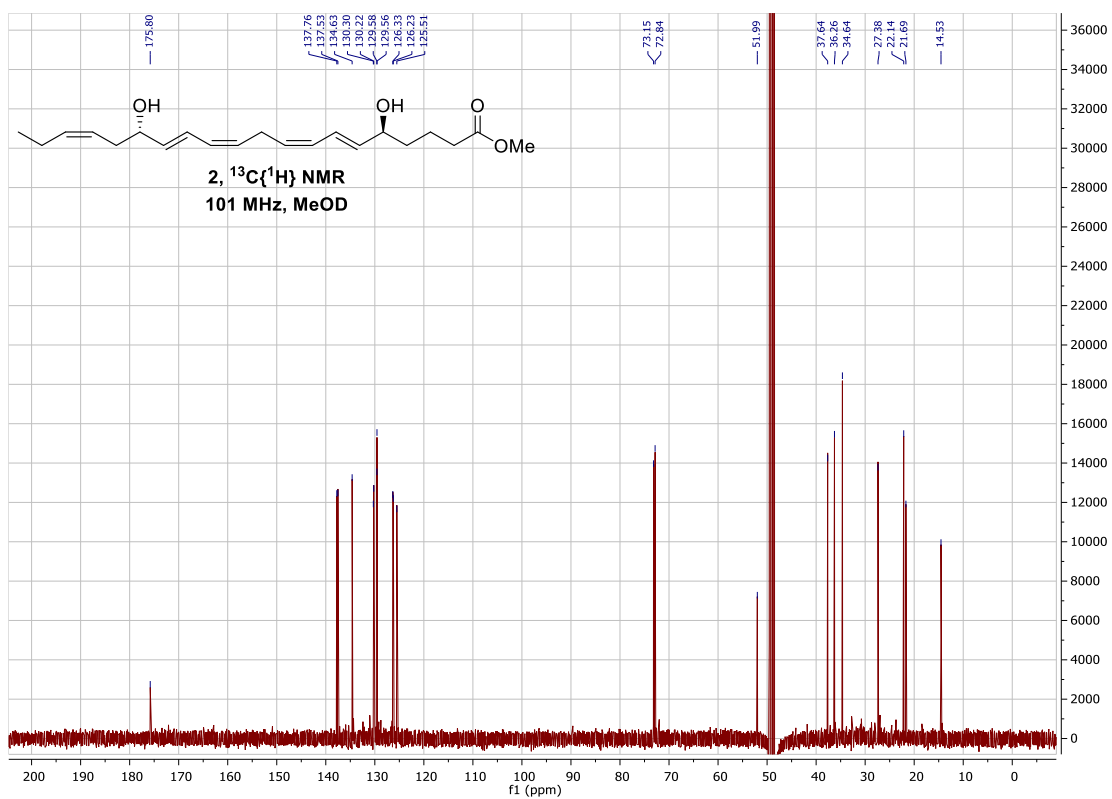

Figure S-39  $^{13}\text{C}$ -NMR of RvE4 methyl ester (2).

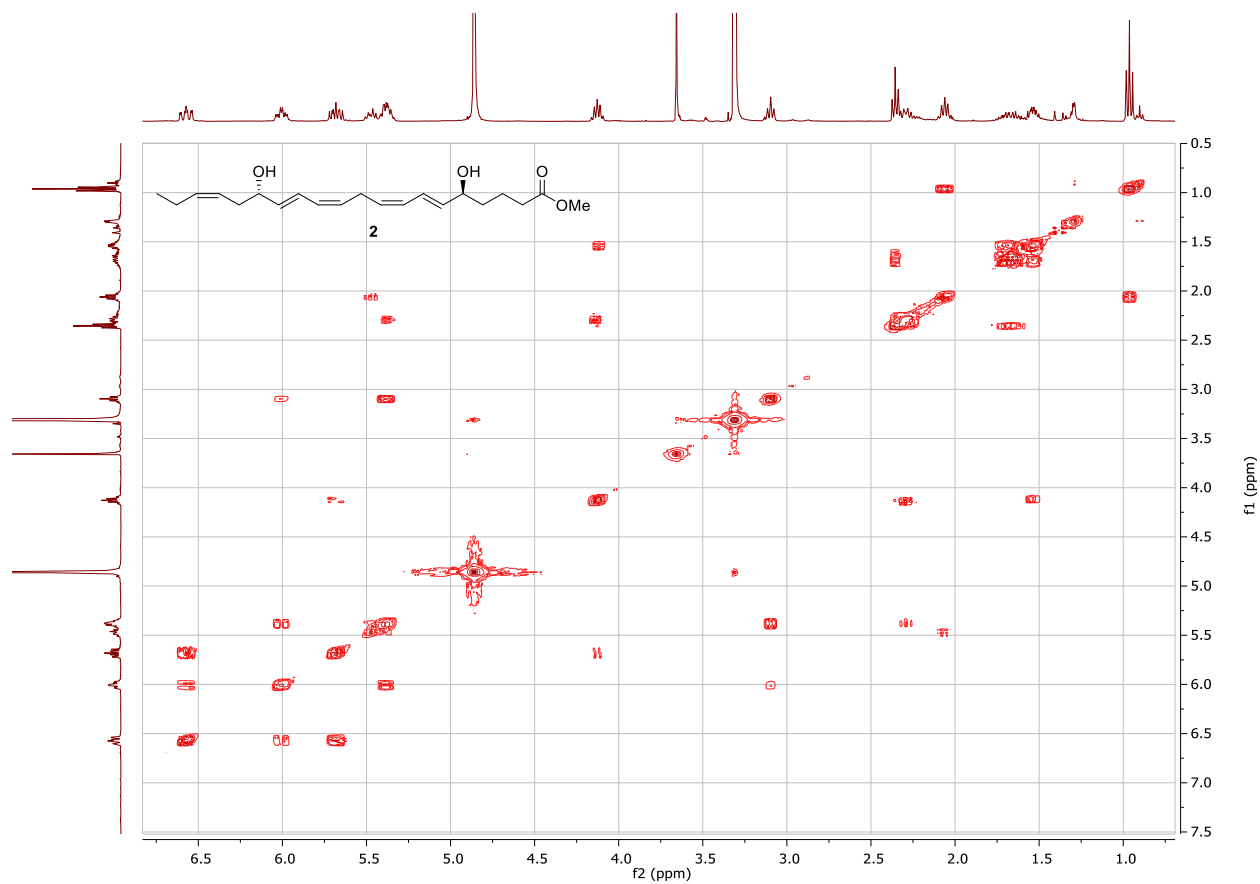

Figure S-40 COSY-spectrum of RvE4 methyl ester (2).

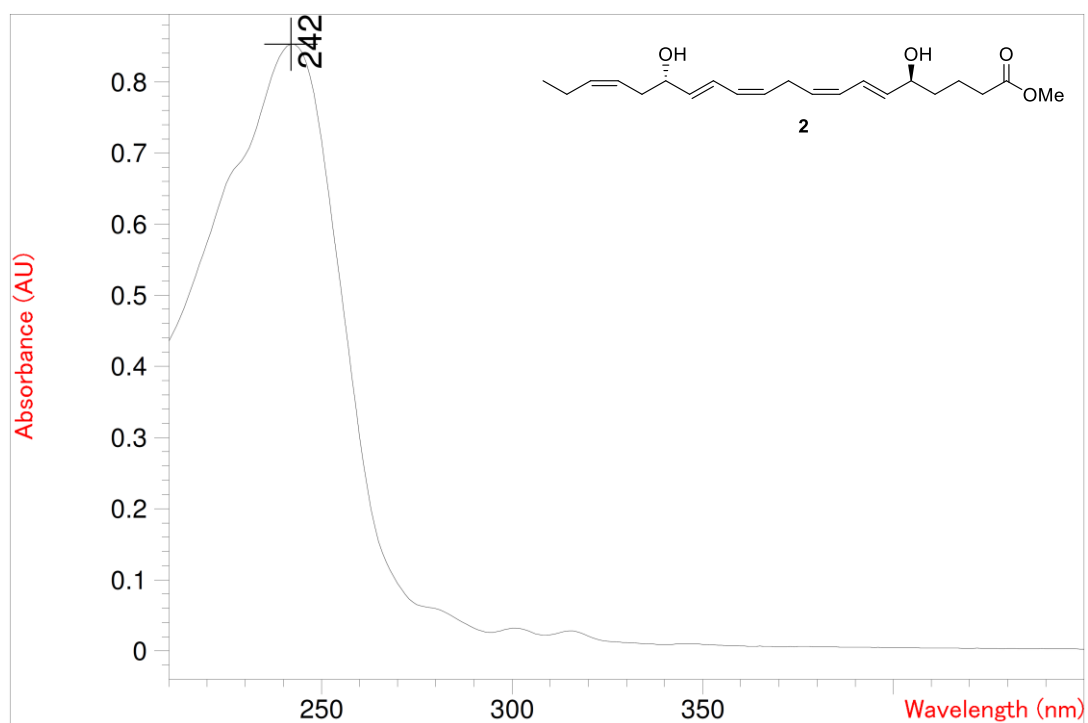

**Figure S-41** UV-Vis of RvE4 methyl ester (2).

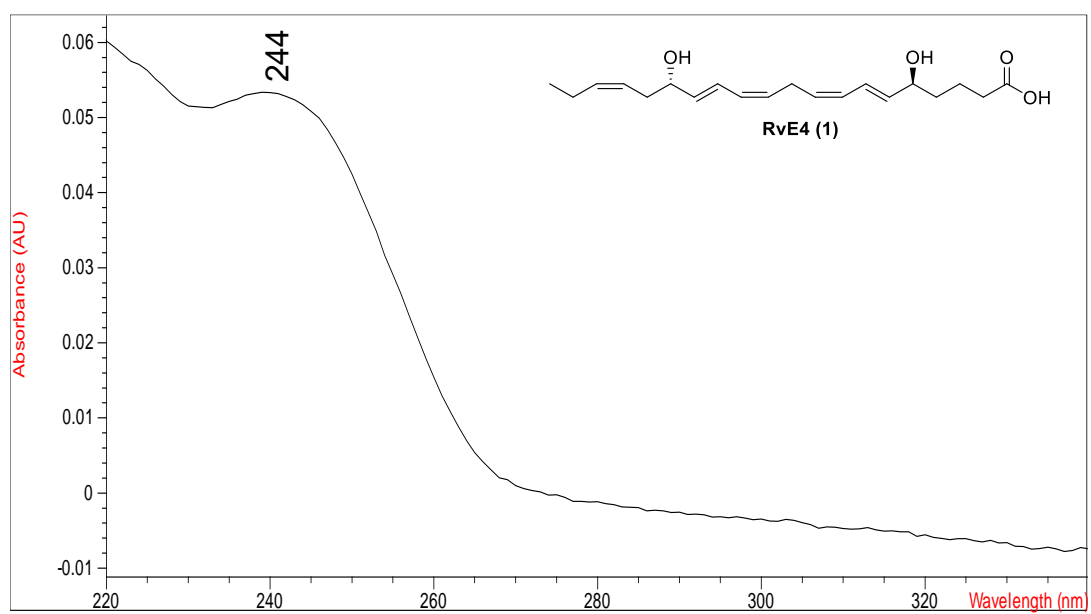

**Figure S-42** UV-Vis of RvE4 (1).

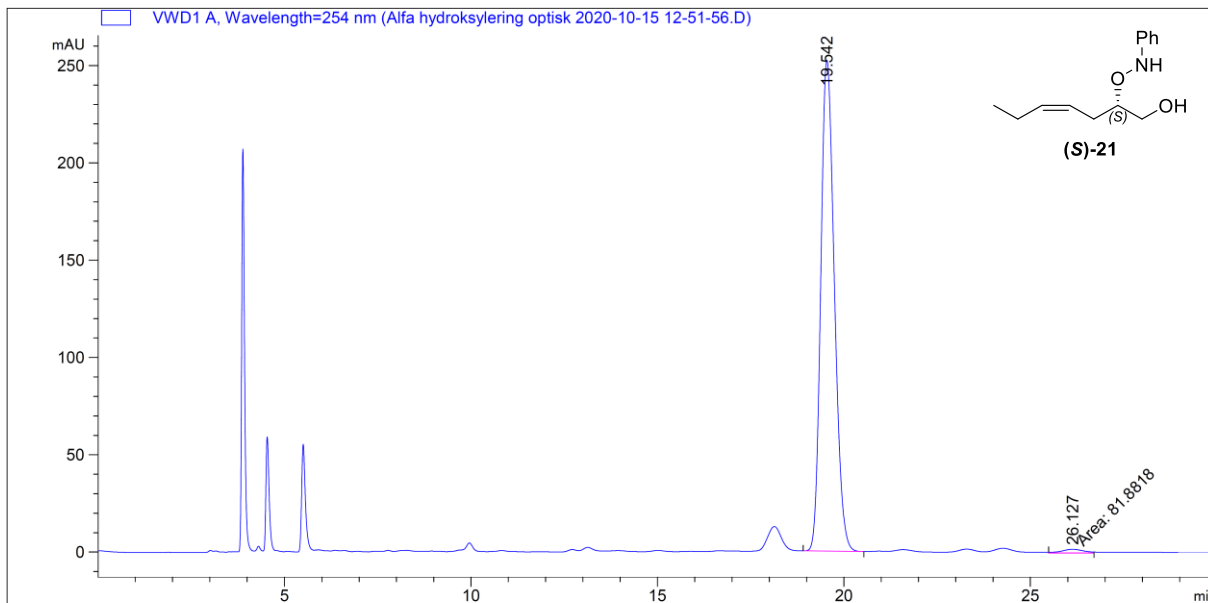

=====  
 Area Percent Report  
 =====

Sorted By : Signal  
 Multiplier : 1.0000  
 Dilution : 1.0000  
 Use Multiplier & Dilution Factor with ISTDs

Signal 1: VWD1 A, Wavelength=254 nm

| Peak # | RetTime [min] | Type | Width [min] | Area [mAU*s] | Height [mAU] | Area %  |
|--------|---------------|------|-------------|--------------|--------------|---------|
| 1      | 19.542        | BB   | 0.3929      | 6376.94629   | 252.25031    | 98.7323 |
| 2      | 26.127        | MM   | 0.7011      | 81.88176     | 1.94639      | 1.2677  |

Totals : 6458.82805 254.19669

**Figure S-43** HPLC chromatogram of (S)-21

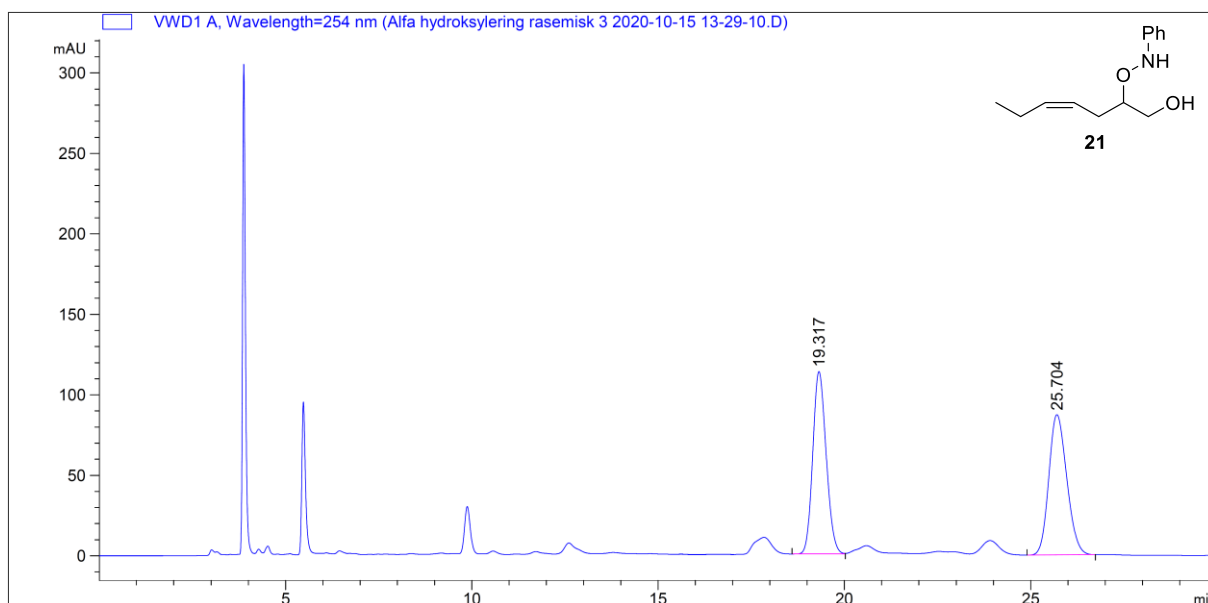

=====  
 Area Percent Report  
 =====

Sorted By : Signal  
 Multiplier : 1.0000  
 Dilution : 1.0000  
 Use Multiplier & Dilution Factor with ISTDs

Signal 1: VWD1 A, Wavelength=254 nm

| Peak # | RetTime [min] | Type | Width [min] | Area [mAU*s] | Height [mAU] | Area %  |
|--------|---------------|------|-------------|--------------|--------------|---------|
| 1      | 19.317        | BV   | 0.3891      | 2837.64722   | 113.32843    | 49.2803 |
| 2      | 25.704        | BB   | 0.5210      | 2920.53052   | 87.13389     | 50.7197 |

Totals : 5758.17773 200.46232

**Figure S-44** HPLC chromatogram of racemic **21**.



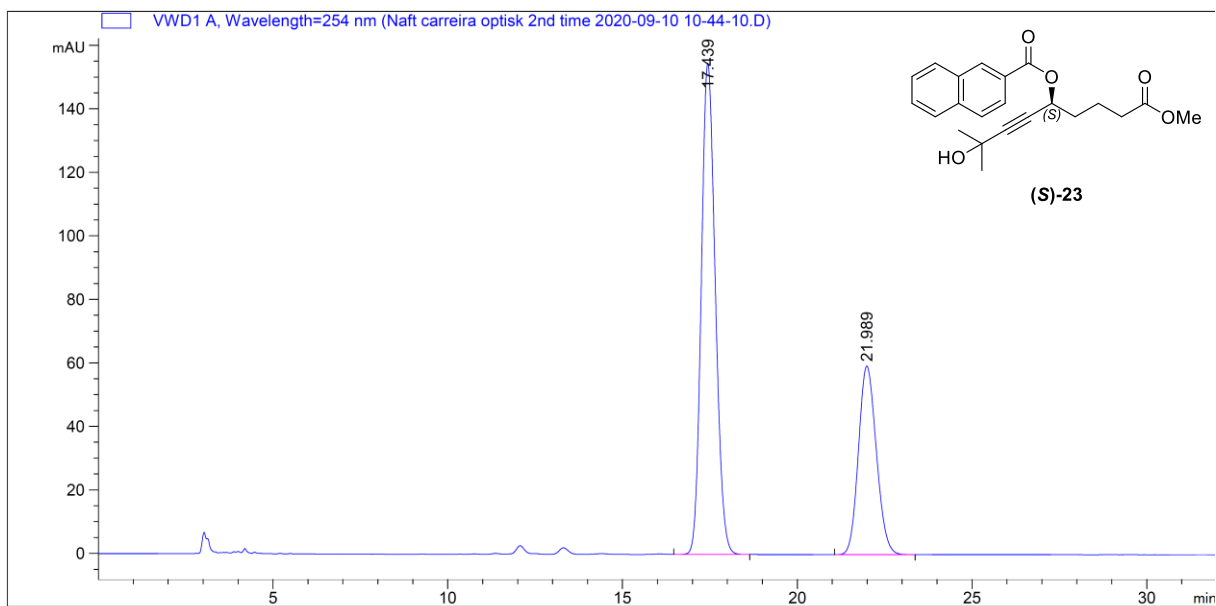

=====  
 Area Percent Report  
 =====

Sorted By : Signal  
 Multiplier : 1.0000  
 Dilution : 1.0000  
 Use Multiplier & Dilution Factor with ISTDs

Signal 1: VWD1 A, Wavelength=254 nm

| Peak # | RetTime [min] | Type | Width [min] | Area [mAU*s] | Height [mAU] | Area %  |
|--------|---------------|------|-------------|--------------|--------------|---------|
| 1      | 17.439        | BB   | 0.4339      | 4308.75732   | 154.70052    | 67.0838 |
| 2      | 21.989        | BB   | 0.5545      | 2114.19019   | 59.37048     | 32.9162 |

Totals :                    6422.94751   214.07100

**Figure S-45** HPLC chromatogram of (S)-23.

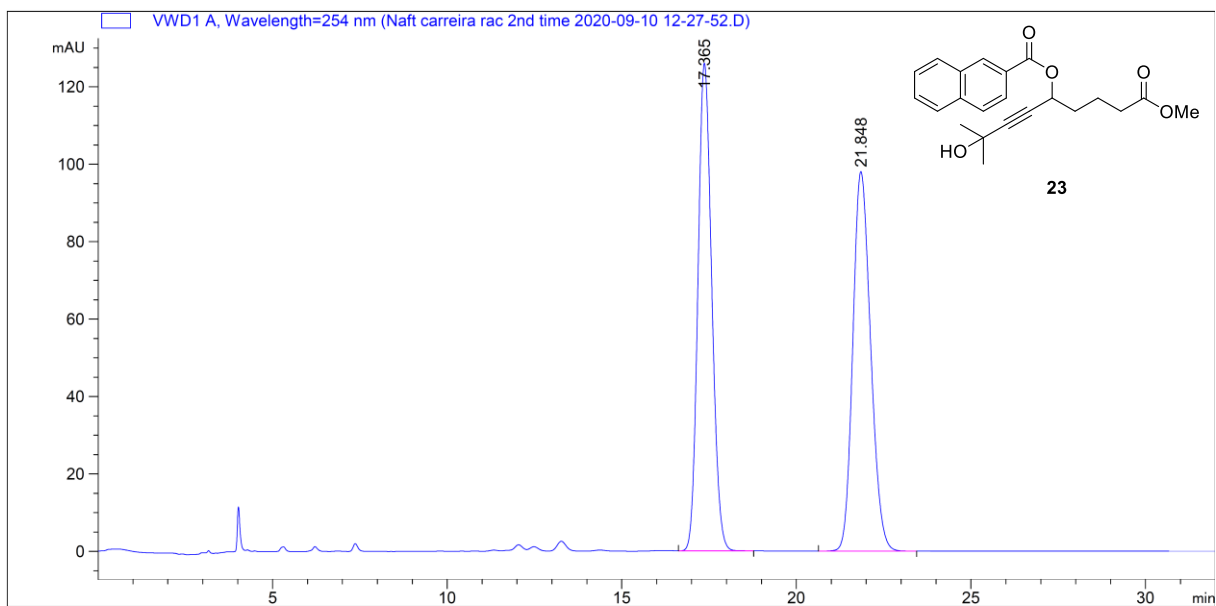

=====  
 Area Percent Report  
 =====

Sorted By : Signal  
 Multiplier : 1.0000  
 Dilution : 1.0000  
 Use Multiplier & Dilution Factor with ISTDs

Signal 1: VWD1 A, Wavelength=254 nm

| Peak # | RetTime [min] | Type | Width [min] | Area [mAU*s] | Height [mAU] | Area %  |
|--------|---------------|------|-------------|--------------|--------------|---------|
| 1      | 17.365        | BB   | 0.4258      | 3453.63062   | 125.97306    | 49.8648 |
| 2      | 21.848        | BB   | 0.5493      | 3472.35303   | 98.02888     | 50.1352 |

Totals :                    6925.98364    224.00195

**Figure S-46** HPLC chromatogram of racemic **23**.

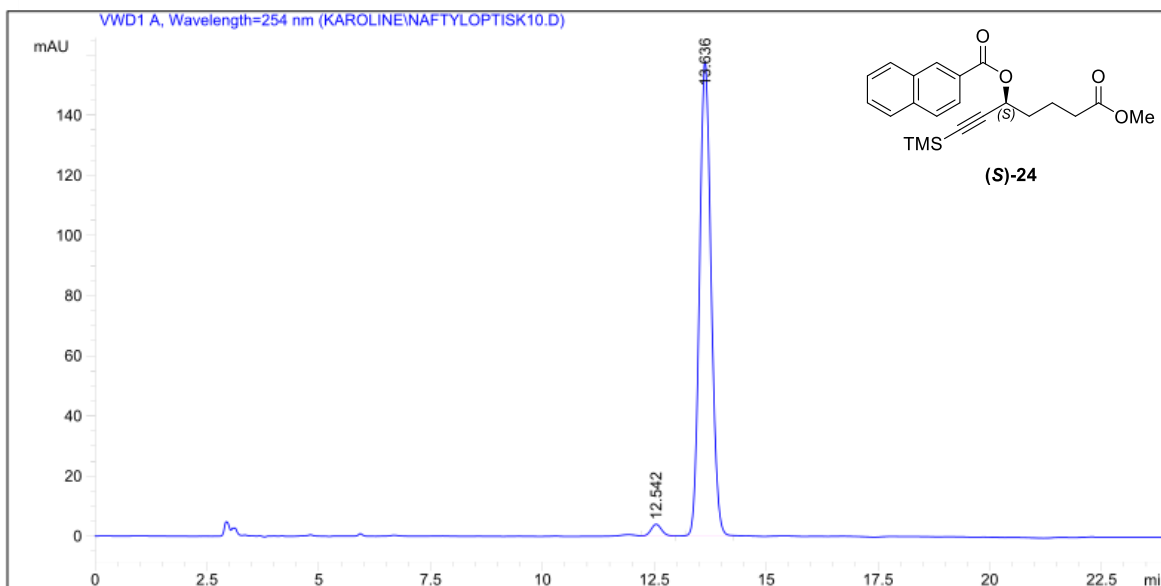

=====  
 Area Percent Report  
 =====

Sorted By : Signal  
 Multiplier : 1.0000  
 Dilution : 1.0000  
 Use Multiplier & Dilution Factor with ISTDs

Signal 1: VWD1 A, Wavelength=254 nm

| Peak # | RetTime [min] | Type | Width [min] | Area mAU   | Area *s | Height [mAU] | Area %  |
|--------|---------------|------|-------------|------------|---------|--------------|---------|
| 1      | 12.542        | VB   | 0.2525      | 62.17613   |         | 3.87989      | 2.1462  |
| 2      | 13.636        | BB   | 0.2796      | 2834.89526 |         | 157.73950    | 97.8538 |

Totals : 2897.07139 161.61939

=====  
 \*\*\* End of Report \*\*\*

**Figure S-47** HPLC chromatogram of (S)-24.

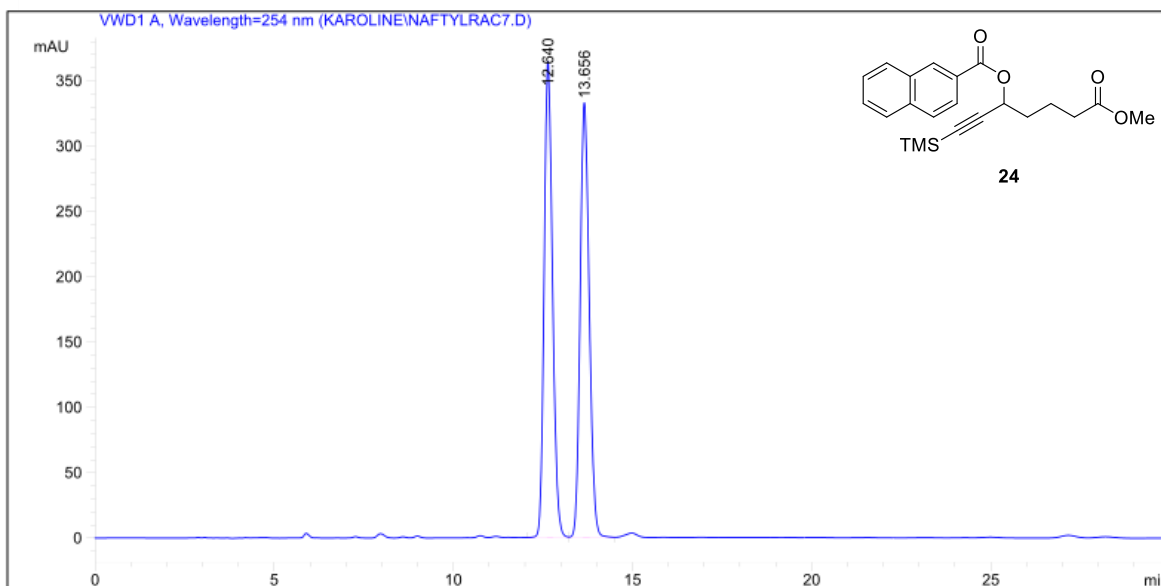

=====  
 Area Percent Report  
 =====

Sorted By : Signal  
 Multiplier : 1.0000  
 Dilution : 1.0000  
 Use Multiplier & Dilution Factor with ISTDs

Signal 1: VWD1 A, Wavelength=254 nm

| Peak #   | RetTime [min] | Type | Width [min] | Area mAU *s | Height [mAU] | Area %  |
|----------|---------------|------|-------------|-------------|--------------|---------|
| 1        | 12.640        | VV   | 0.2526      | 5933.28467  | 364.37500    | 50.3024 |
| 2        | 13.656        | VV   | 0.2739      | 5861.94385  | 332.81738    | 49.6976 |
| Totals : |               |      |             | 1.17952e4   | 697.19238    |         |

=====  
 \*\*\* End of Report \*\*\*

**Figure S-48** HPLC chromatogram of racemic **24**.

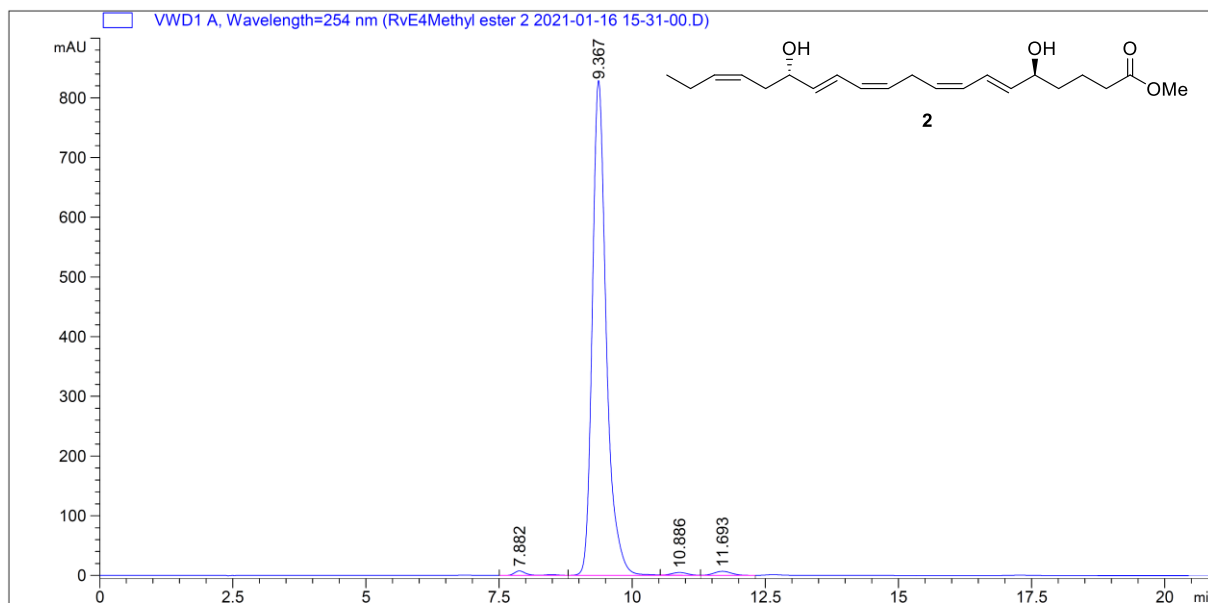

=====  
 Area Percent Report  
 =====

Sorted By : Signal  
 Multiplier : 1.0000  
 Dilution : 1.0000  
 Use Multiplier & Dilution Factor with ISTDs

Signal 1: VWD1 A, Wavelength=254 nm

| Peak # | RetTime [min] | Type | Width [min] | Area [mAU*s] | Height [mAU] | Area %  |
|--------|---------------|------|-------------|--------------|--------------|---------|
| 1      | 7.882         | BV R | 0.2527      | 130.58907    | 7.55460      | 0.8414  |
| 2      | 9.367         | BV R | 0.2771      | 1.51413e4    | 828.86536    | 97.5560 |
| 3      | 10.886        | VV E | 0.3130      | 93.40971     | 4.67622      | 0.6018  |
| 4      | 11.693        | VB   | 0.3543      | 155.33318    | 6.80567      | 1.0008  |

Totals : 1.55207e4 847.90185

**Figure S-49** HPLC chromatogram of RvE4 methyl ester (2).

**Acquisition Parameter**

|             |            |                      |          |                  |           |
|-------------|------------|----------------------|----------|------------------|-----------|
| Source Type | ESI        | Ion Polarity         | Positive | Set Nebulizer    | 0.4 Bar   |
| Focus       | Not active | Set Capillary        | 3500 V   | Set Dry Heater   | 200 °C    |
| Scan Begin  | 50 m/z     | Set End Plate Offset | -500 V   | Set Dry Gas      | 4.0 l/min |
| Scan End    | 1500 m/z   | Set Charging Voltage | 2000 V   | Set Divert Valve | Waste     |
|             |            | Set Corona           | 0 nA     | Set APCI Heater  | 0 °C      |

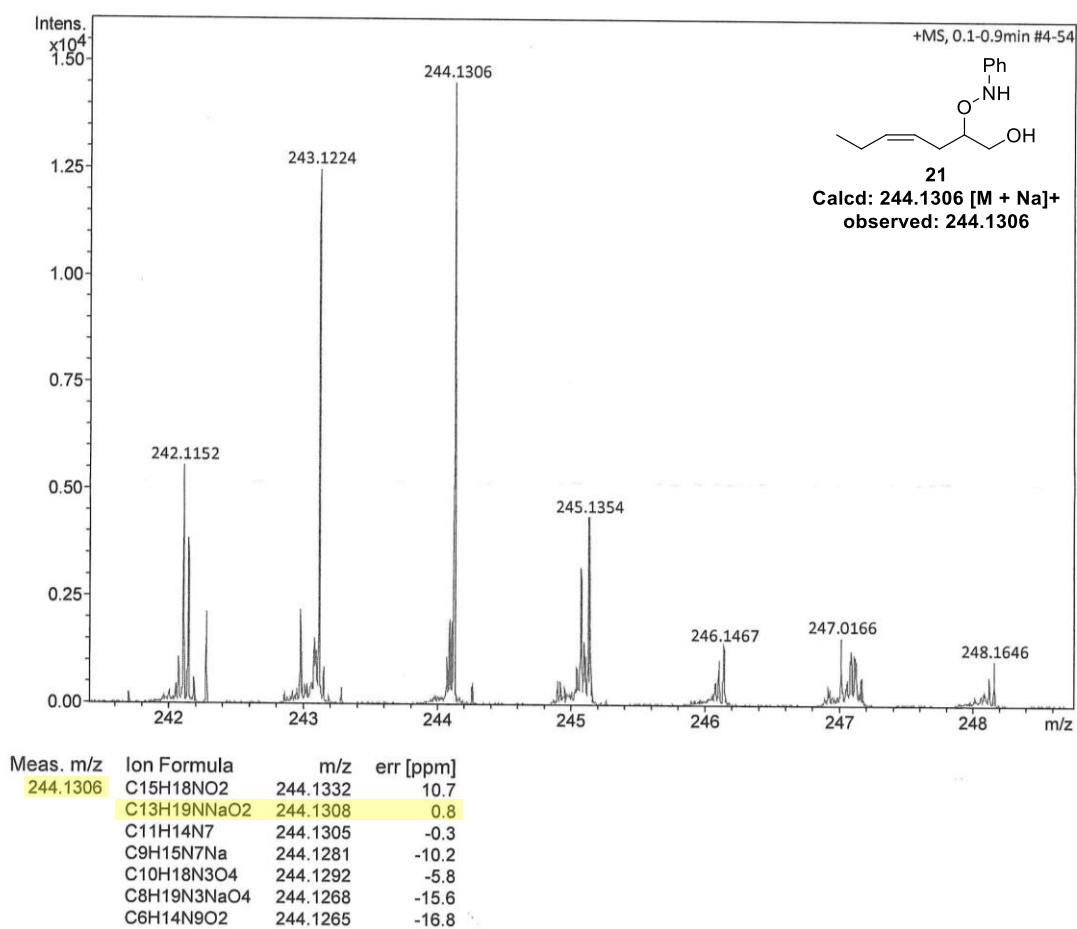

**Figure S-50** HRMS spectrum of compound **21**.

**Acquisition Parameter**

|             |            |                      |          |                  |           |
|-------------|------------|----------------------|----------|------------------|-----------|
| Source Type | ESI        | Ion Polarity         | Positive | Set Nebulizer    | 1.0 Bar   |
| Focus       | Not active | Set Capillary        | 3500 V   | Set Dry Heater   | 250 °C    |
| Scan Begin  | 50 m/z     | Set End Plate Offset | -500 V   | Set Dry Gas      | 8.0 l/min |
| Scan End    | 1500 m/z   | Set Charging Voltage | 2000 V   | Set Divert Valve | Waste     |
|             |            | Set Corona           | 0 nA     | Set APCI Heater  | 0 °C      |

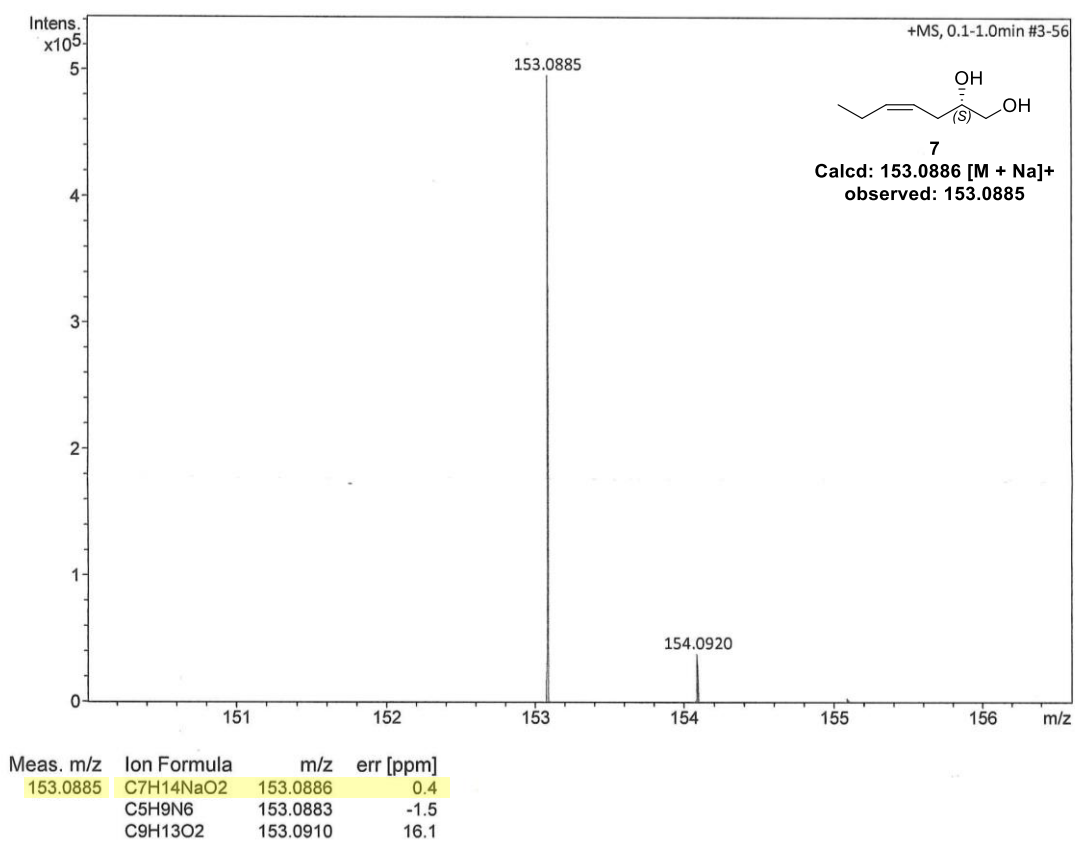**Figure S-51** HRMS spectrum of compound **7**.

**Acquisition Parameter**

|             |            |                      |          |                  |           |
|-------------|------------|----------------------|----------|------------------|-----------|
| Source Type | ESI        | Ion Polarity         | Positive | Set Nebulizer    | 0.3 Bar   |
| Focus       | Not active | Set Capillary        | 3500 V   | Set Dry Heater   | 200 °C    |
| Scan Begin  | 50 m/z     | Set End Plate Offset | -500 V   | Set Dry Gas      | 4.0 l/min |
| Scan End    | 1500 m/z   | Set Charging Voltage | 2000 V   | Set Divert Valve | Waste     |
|             |            | Set Corona           | 0 nA     | Set APCI Heater  | 0 °C      |

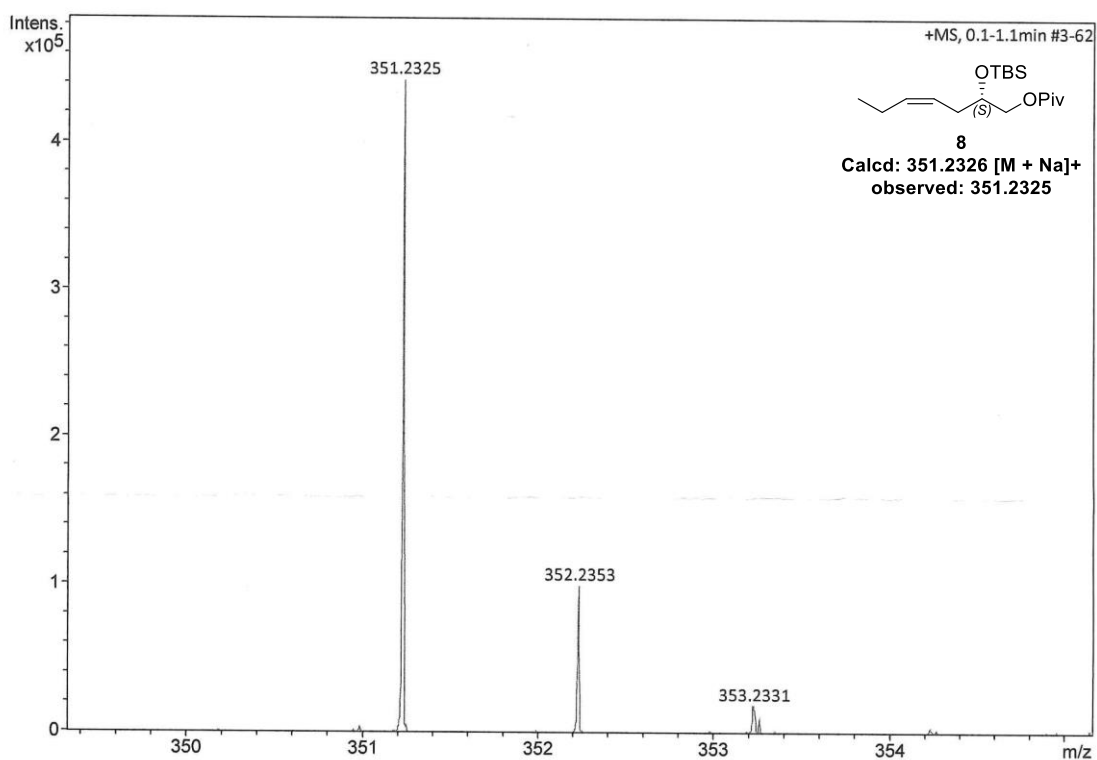

| Meas. m/z | Ion Formula  | m/z      | err [ppm] |
|-----------|--------------|----------|-----------|
| 351.2325  | C15H35N2O5Si | 351.2310 | -4.4      |
|           | C16H31N6OSi  | 351.2323 | -0.6      |
|           | C18H36NaO3Si | 351.2326 | 0.2       |
|           | C24H31O2     | 351.2319 | -1.9      |

**Figure S-52** HRMS spectrum of compound **8**.



**Acquisition Parameter**

|             |            |                      |          |                  |           |
|-------------|------------|----------------------|----------|------------------|-----------|
| Source Type | ESI        | Ion Polarity         | Positive | Set Nebulizer    | 1.0 Bar   |
| Focus       | Not active | Set Capillary        | 3500 V   | Set Dry Heater   | 250 °C    |
| Scan Begin  | 50 m/z     | Set End Plate Offset | -500 V   | Set Dry Gas      | 8.0 l/min |
| Scan End    | 1500 m/z   | Set Charging Voltage | 2000 V   | Set Divert Valve | Waste     |
|             |            | Set Corona           | 0 nA     | Set APCI Heater  | 0 °C      |

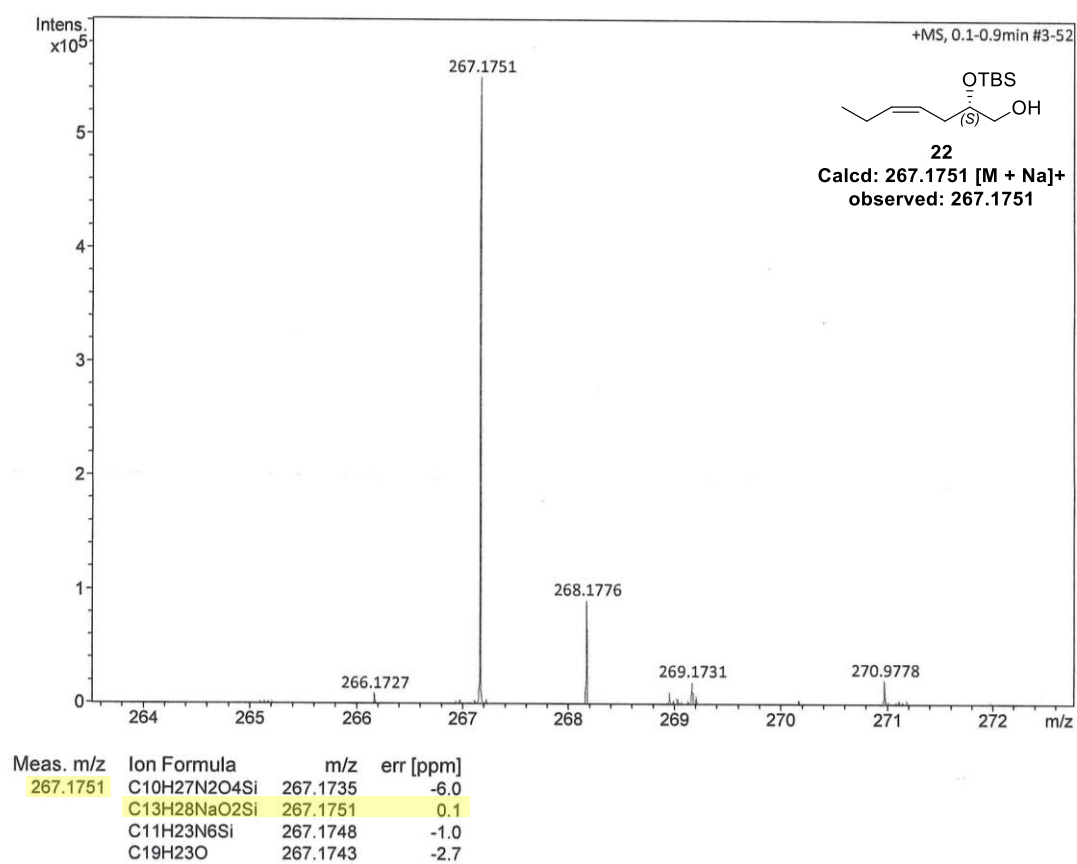

**Figure S-53** HRMS spectrum of compound **22**.

**Acquisition Parameter**

|             |            |                      |          |                  |           |
|-------------|------------|----------------------|----------|------------------|-----------|
| Source Type | ESI        | Ion Polarity         | Positive | Set Nebulizer    | 0.3 Bar   |
| Focus       | Not active | Set Capillary        | 3500 V   | Set Dry Heater   | 200 °C    |
| Scan Begin  | 50 m/z     | Set End Plate Offset | -500 V   | Set Dry Gas      | 4.0 l/min |
| Scan End    | 1500 m/z   | Set Charging Voltage | 2000 V   | Set Divert Valve | Waste     |
|             |            | Set Corona           | 0 nA     | Set APCI Heater  | 0 °C      |

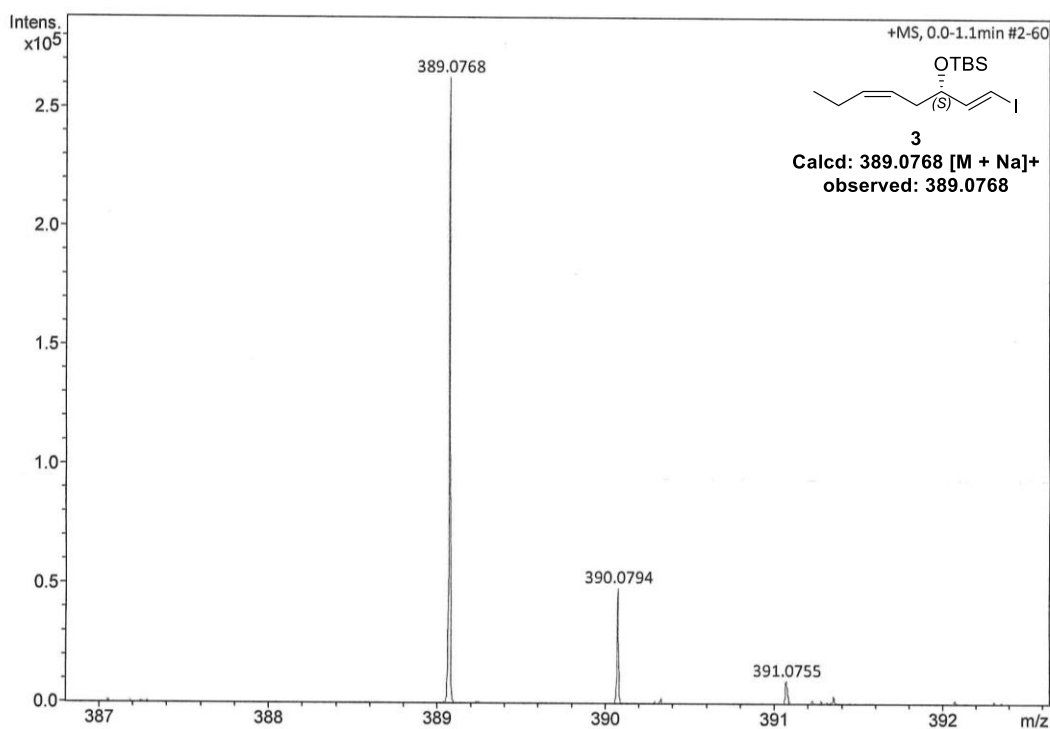

| Meas. m/z | Ion Formula    | m/z      | err [ppm] |
|-----------|----------------|----------|-----------|
| 389.0768  | C11H26IN2O3Si  | 389.0752 | -4.1      |
|           | C14H27INaOSi   | 389.0768 | 0.1       |
|           | C11H14N8NaO5Si | 389.0749 | -4.9      |
|           | C12H17N4O9Si   | 389.0759 | -2.2      |
|           | C20H22I        | 389.0761 | -1.8      |
|           | C12H10N12NaOSi | 389.0762 | -1.5      |
|           | C13H13N8O5Si   | 389.0773 | 1.3       |
|           | C15H18N2NaO7Si | 389.0775 | 2.0       |
|           | C21H13N2O6     | 389.0768 | 0.1       |
|           | C18H5N12       | 389.0755 | -3.4      |
|           | C20H10N6NaO2   | 389.0757 | -2.7      |
|           | C14H9N12OSi    | 389.0786 | 4.7       |
|           | C22H9N6O2      | 389.0781 | 3.5       |
|           | C24H14NaO4     | 389.0784 | 4.2       |
|           | C27H14NaSi     | 389.0757 | -2.8      |
|           | C29H13Si       | 389.0781 | 3.4       |

**Figure S-54** HRMS spectrum of compound **3**.

**Acquisition Parameter**

|             |            |                      |          |                  |           |
|-------------|------------|----------------------|----------|------------------|-----------|
| Source Type | ESI        | Ion Polarity         | Positive | Set Nebulizer    | 0.3 Bar   |
| Focus       | Not active | Set Capillary        | 3500 V   | Set Dry Heater   | 200 °C    |
| Scan Begin  | 50 m/z     | Set End Plate Offset | -500 V   | Set Dry Gas      | 4.0 l/min |
| Scan End    | 1500 m/z   | Set Charging Voltage | 2000 V   | Set Divert Valve | Waste     |
|             |            | Set Corona           | 0 nA     | Set APCI Heater  | 0 °C      |

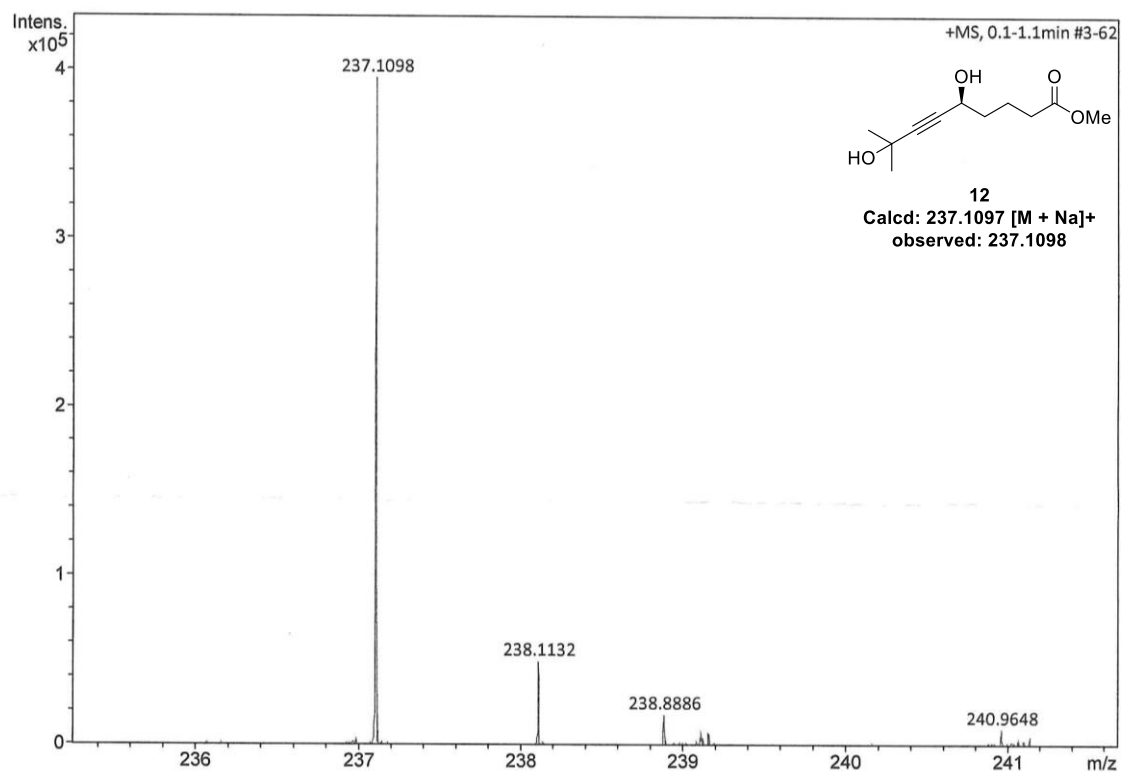

| Meas. m/z | Ion Formula                                                    | m/z      | err [ppm] |
|-----------|----------------------------------------------------------------|----------|-----------|
| 237.1098  | C <sub>11</sub> H <sub>18</sub> NaO <sub>4</sub>               | 237.1097 | -0.1      |
|           | C <sub>9</sub> H <sub>13</sub> N <sub>6</sub> O <sub>2</sub>   | 237.1095 | -1.3      |
|           | C <sub>11</sub> H <sub>15</sub> N <sub>3</sub> O <sub>3</sub>  | 237.1108 | 4.4       |
|           | C <sub>9</sub> H <sub>16</sub> N <sub>3</sub> NaO <sub>3</sub> | 237.1084 | -5.8      |
|           | C <sub>7</sub> H <sub>11</sub> N <sub>9</sub> O                | 237.1081 | -7.0      |
|           | C <sub>12</sub> H <sub>14</sub> N <sub>4</sub> Na              | 237.1111 | 5.5       |
|           | C <sub>8</sub> H <sub>17</sub> N <sub>2</sub> O <sub>6</sub>   | 237.1081 | -6.9      |

**Figure S-55** HRMS spectrum of compound **12**.

**Acquisition Parameter**

|             |            |                      |          |                  |           |
|-------------|------------|----------------------|----------|------------------|-----------|
| Source Type | ESI        | Ion Polarity         | Positive | Set Nebulizer    | 0.4 Bar   |
| Focus       | Not active | Set Capillary        | 3500 V   | Set Dry Heater   | 200 °C    |
| Scan Begin  | 50 m/z     | Set End Plate Offset | -500 V   | Set Dry Gas      | 4.0 l/min |
| Scan End    | 1500 m/z   | Set Charging Voltage | 2000 V   | Set Divert Valve | Waste     |
|             |            | Set Corona           | 0 nA     | Set APCI Heater  | 0 °C      |

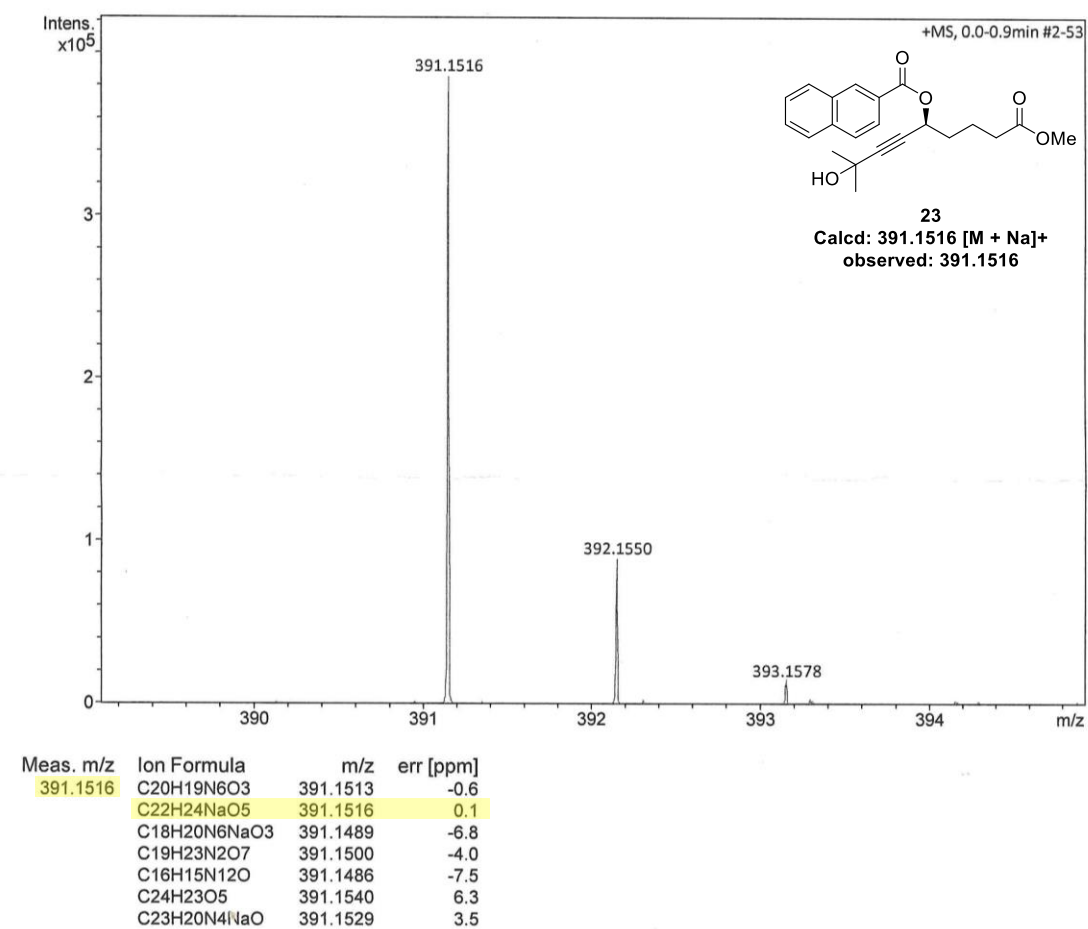

**Figure S-56** HRMS spectrum of compound **23**.

**Acquisition Parameter**

|             |            |                      |          |                  |           |
|-------------|------------|----------------------|----------|------------------|-----------|
| Source Type | ESI        | Ion Polarity         | Positive | Set Nebulizer    | 0.4 Bar   |
| Focus       | Not active | Set Capillary        | 3500 V   | Set Dry Heater   | 200 °C    |
| Scan Begin  | 50 m/z     | Set End Plate Offset | -500 V   | Set Dry Gas      | 4.0 l/min |
| Scan End    | 1500 m/z   | Set Charging Voltage | 2000 V   | Set Divert Valve | Waste     |
|             |            | Set Corona           | 0 nA     | Set APCI Heater  | 0 °C      |

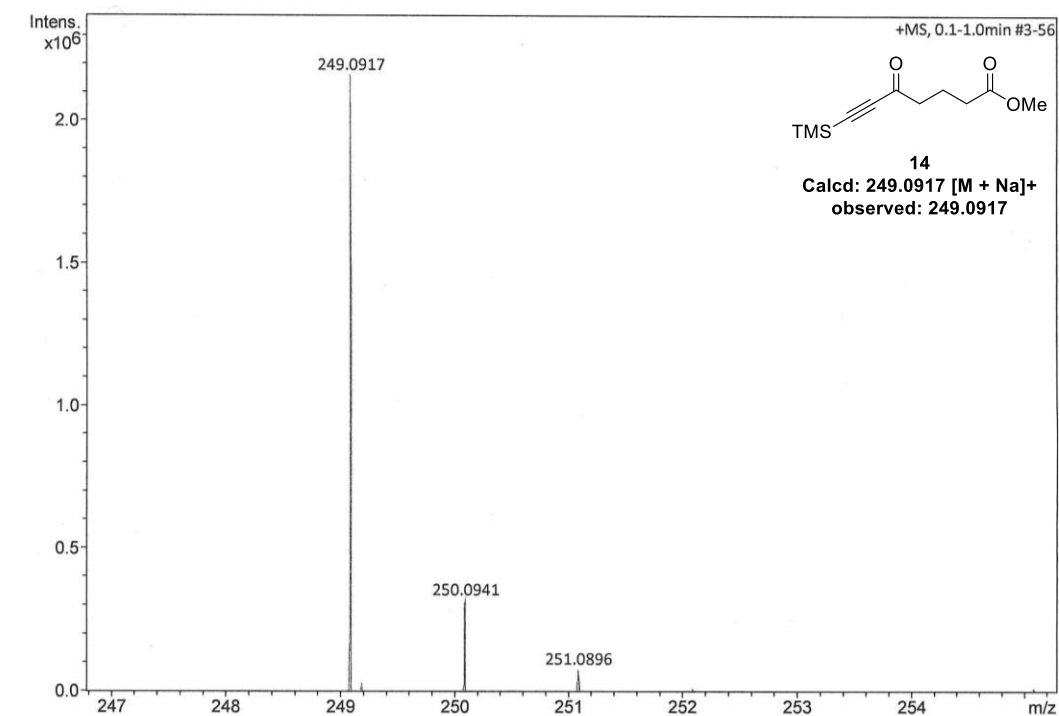

| Meas. m/z | Ion Formula  | m/z      | err [ppm] |
|-----------|--------------|----------|-----------|
| 249.0917  | C8H17N2O5Si  | 249.0901 | -6.4      |
|           | C15H14NaO2   | 249.0886 | -12.5     |
|           | C9H13N6OSi   | 249.0915 | -1.0      |
|           | C13H9N6      | 249.0883 | -13.6     |
|           | C11H18NaO3Si | 249.0917 | 0.1       |
|           | C17H13O2     | 249.0910 | -2.8      |
|           | C13H17O3Si   | 249.0941 | 9.8       |
|           | C8H18NaO7    | 249.0945 | 11.1      |

**Figure S-57** HRMS spectrum of compound **14**.

**Acquisition Parameter**

|             |            |                      |          |                  |           |
|-------------|------------|----------------------|----------|------------------|-----------|
| Source Type | ESI        | Ion Polarity         | Positive | Set Nebulizer    | 0.4 Bar   |
| Focus       | Not active | Set Capillary        | 3500 V   | Set Dry Heater   | 200 °C    |
| Scan Begin  | 50 m/z     | Set End Plate Offset | -500 V   | Set Dry Gas      | 4.0 l/min |
| Scan End    | 1500 m/z   | Set Charging Voltage | 2000 V   | Set Divert Valve | Waste     |
|             |            | Set Corona           | 0 nA     | Set APCI Heater  | 0 °C      |

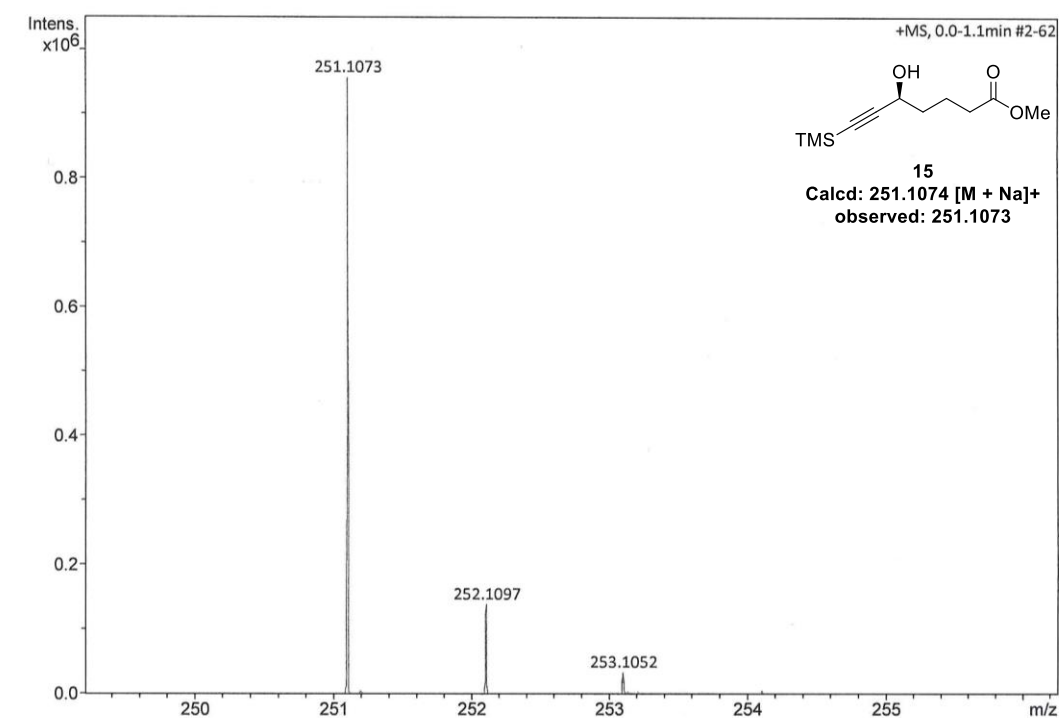

| Meas. m/z | Ion Formula                                                     | m/z      | err [ppm] |
|-----------|-----------------------------------------------------------------|----------|-----------|
| 251.1073  | C <sub>8</sub> H <sub>19</sub> N <sub>2</sub> O <sub>5</sub> Si | 251.1058 | -6.1      |
|           | C <sub>15</sub> H <sub>16</sub> NaO <sub>2</sub>                | 251.1043 | -12.2     |
|           | C <sub>13</sub> H <sub>11</sub> N <sub>6</sub>                  | 251.1040 | -13.3     |
|           | C <sub>9</sub> H <sub>15</sub> N <sub>6</sub> O <sub>5</sub> Si | 251.1071 | -0.8      |
|           | C <sub>11</sub> H <sub>20</sub> NaO <sub>3</sub> Si             | 251.1074 | 0.4       |
|           | C <sub>17</sub> H <sub>15</sub> O <sub>2</sub>                  | 251.1067 | -2.6      |
|           | C <sub>13</sub> H <sub>19</sub> O <sub>3</sub> Si               | 251.1098 | 9.9       |

**Figure S-58** HRMS spectrum of compound **15**.

**Acquisition Parameter**

|             |            |                      |          |                  |           |
|-------------|------------|----------------------|----------|------------------|-----------|
| Source Type | ESI        | Ion Polarity         | Positive | Set Nebulizer    | 0.4 Bar   |
| Focus       | Not active | Set Capillary        | 3500 V   | Set Dry Heater   | 200 °C    |
| Scan Begin  | 50 m/z     | Set End Plate Offset | -500 V   | Set Dry Gas      | 4.0 l/min |
| Scan End    | 1500 m/z   | Set Charging Voltage | 2000 V   | Set Divert Valve | Waste     |
|             |            | Set Corona           | 0 nA     | Set APCI Heater  | 0 °C      |

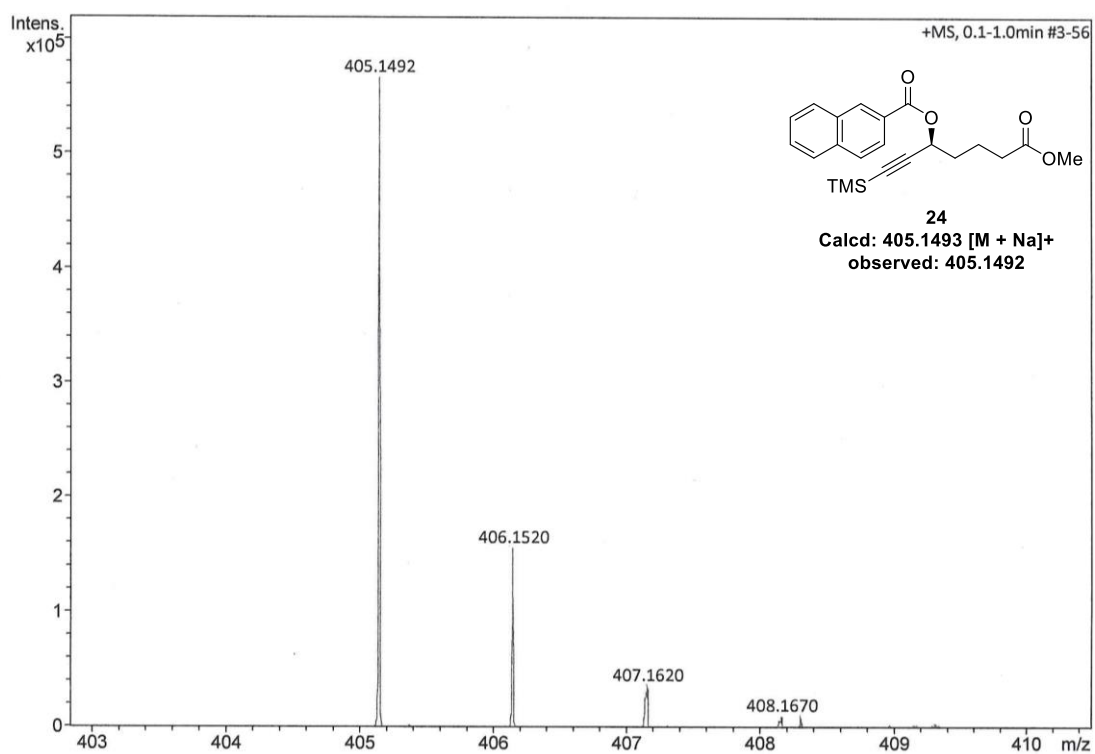

| Meas. m/z | Ion Formula                                                      | m/z      | err [ppm] |
|-----------|------------------------------------------------------------------|----------|-----------|
| 405.1492  | C <sub>28</sub> H <sub>21</sub> O <sub>3</sub>                   | 405.1485 | -1.7      |
|           | C <sub>20</sub> H <sub>21</sub> N <sub>6</sub> O <sub>2</sub> Si | 405.1490 | -0.6      |
|           | C <sub>19</sub> H <sub>25</sub> N <sub>2</sub> O <sub>6</sub> Si | 405.1476 | -3.9      |
|           | C <sub>22</sub> H <sub>26</sub> NaO <sub>4</sub> Si              | 405.1493 | 0.1       |
|           | C <sub>23</sub> H <sub>22</sub> N <sub>4</sub> NaSi              | 405.1506 | 3.4       |

**Figure S-59** HRMS spectrum of compound **24**.

### Acquisition Parameter

|             |            |                      |          |                  |           |
|-------------|------------|----------------------|----------|------------------|-----------|
| Source Type | ESI        | Ion Polarity         | Positive | Set Nebulizer    | 0.4 Bar   |
| Focus       | Not active | Set Capillary        | 3500 V   | Set Dry Heater   | 200 °C    |
| Scan Begin  | 50 m/z     | Set End Plate Offset | -500 V   | Set Dry Gas      | 4.0 l/min |
| Scan End    | 1500 m/z   | Set Charging Voltage | 2000 V   | Set Divert Valve | Waste     |
|             |            | Set Corona           | 0 nA     | Set APCI Heater  | 0 °C      |

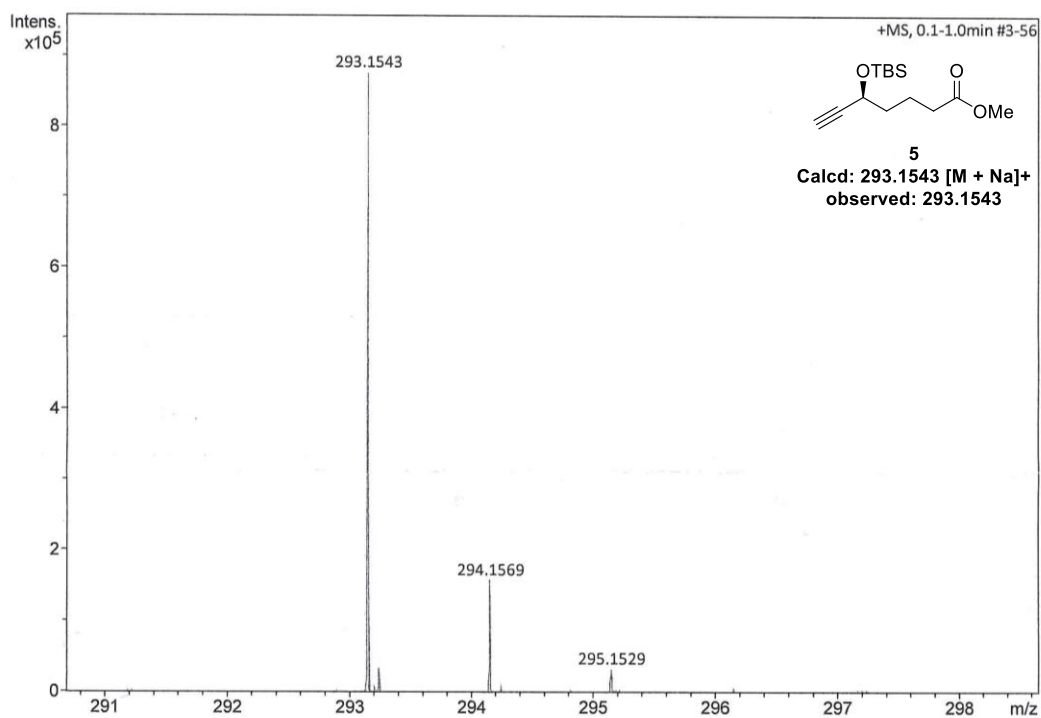

| Meas. m/z | Ion Formula                                                      | m/z      | err [ppm] |
|-----------|------------------------------------------------------------------|----------|-----------|
| 293.1543  | C <sub>10</sub> H <sub>22</sub> N <sub>6</sub> NaOSi             | 293.1517 | -8.9      |
|           | C <sub>11</sub> H <sub>25</sub> N <sub>2</sub> O <sub>5</sub> Si | 293.1527 | -5.3      |
|           | C <sub>12</sub> H <sub>21</sub> N <sub>6</sub> O <sub>5</sub> Si | 293.1541 | -0.7      |
|           | C <sub>14</sub> H <sub>26</sub> NaO <sub>3</sub> Si              | 293.1543 | 0.2       |
|           | C <sub>20</sub> H <sub>21</sub> O <sub>2</sub>                   | 293.1536 | -2.3      |
|           | C <sub>16</sub> H <sub>25</sub> O <sub>3</sub> Si                | 293.1567 | 8.4       |
|           | C <sub>11</sub> H <sub>26</sub> NaO <sub>7</sub>                 | 293.1571 | 9.5       |

Figure S-60 HRMS spectrum of compound 5.



**Acquisition Parameter**

|             |            |                      |          |                  |           |
|-------------|------------|----------------------|----------|------------------|-----------|
| Source Type | ESI        | Ion Polarity         | Positive | Set Nebulizer    | 0.4 Bar   |
| Focus       | Not active | Set Capillary        | 3500 V   | Set Dry Heater   | 200 °C    |
| Scan Begin  | 50 m/z     | Set End Plate Offset | -500 V   | Set Dry Gas      | 4.0 l/min |
| Scan End    | 1500 m/z   | Set Charging Voltage | 2000 V   | Set Divert Valve | Waste     |
|             |            | Set Corona           | 0 nA     | Set APCI Heater  | 0 °C      |

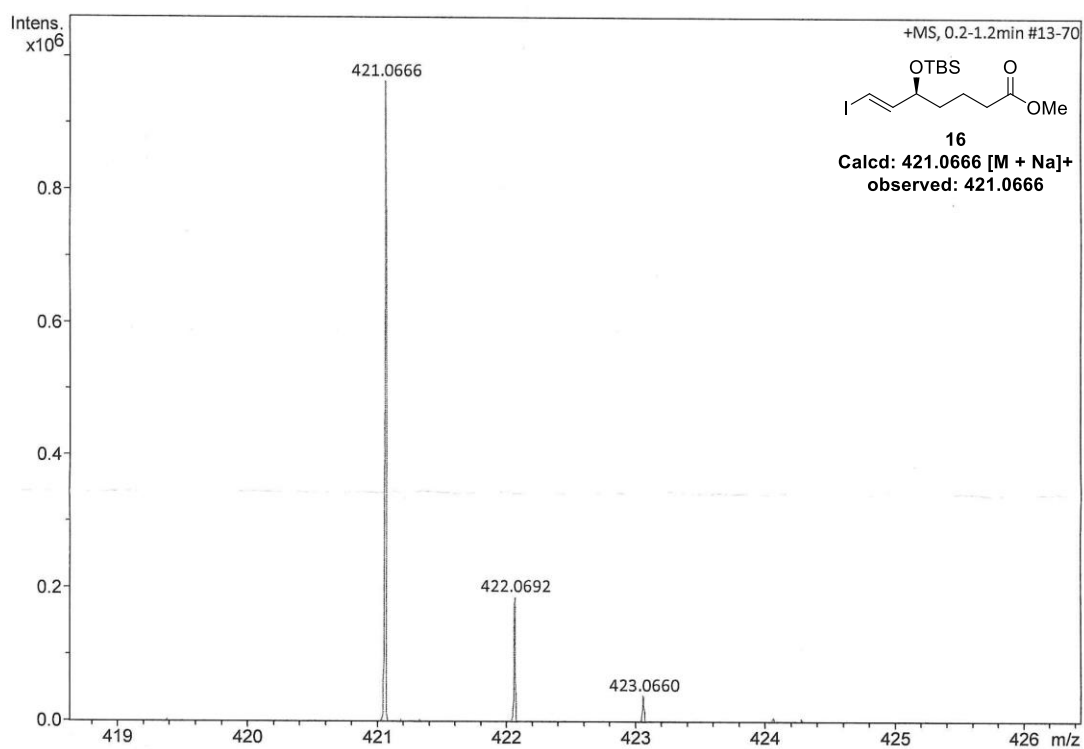

| Meas. m/z | Ion Formula                                                         | m/z      | err [ppm] |
|-----------|---------------------------------------------------------------------|----------|-----------|
| 421.0666  | C <sub>12</sub> H <sub>22</sub> IN <sub>6</sub> O <sub>3</sub> Si   | 421.0664 | -0.6      |
|           | C <sub>14</sub> H <sub>27</sub> INaO <sub>3</sub> Si                | 421.0666 | 0.1       |
|           | C <sub>20</sub> H <sub>22</sub> IO <sub>2</sub>                     | 421.0659 | -1.7      |
|           | C <sub>12</sub> H <sub>17</sub> N <sub>4</sub> O <sub>11</sub> Si   | 421.0658 | -2.0      |
|           | C <sub>12</sub> H <sub>10</sub> N <sub>12</sub> NaO <sub>3</sub> Si | 421.0660 | -1.4      |
|           | C <sub>13</sub> H <sub>13</sub> N <sub>8</sub> O <sub>7</sub> Si    | 421.0671 | 1.2       |
|           | C <sub>15</sub> H <sub>18</sub> N <sub>2</sub> NaO <sub>9</sub> Si  | 421.0674 | 1.8       |
|           | C <sub>21</sub> H <sub>13</sub> N <sub>2</sub> O <sub>8</sub>       | 421.0666 | 0.1       |
|           | C <sub>21</sub> H <sub>6</sub> N <sub>10</sub> Na                   | 421.0669 | 0.7       |

**Figure S-61** HRMS spectrum of compound **16**.

**Acquisition Parameter**

|             |            |                      |          |                  |           |
|-------------|------------|----------------------|----------|------------------|-----------|
| Source Type | ESI        | Ion Polarity         | Positive | Set Nebulizer    | 0.4 Bar   |
| Focus       | Not active | Set Capillary        | 3500 V   | Set Dry Heater   | 200 °C    |
| Scan Begin  | 50 m/z     | Set End Plate Offset | -500 V   | Set Dry Gas      | 4.0 l/min |
| Scan End    | 1500 m/z   | Set Charging Voltage | 2000 V   | Set Divert Valve | Waste     |
|             |            | Set Corona           | 0 nA     | Set APCI Heater  | 0 °C      |

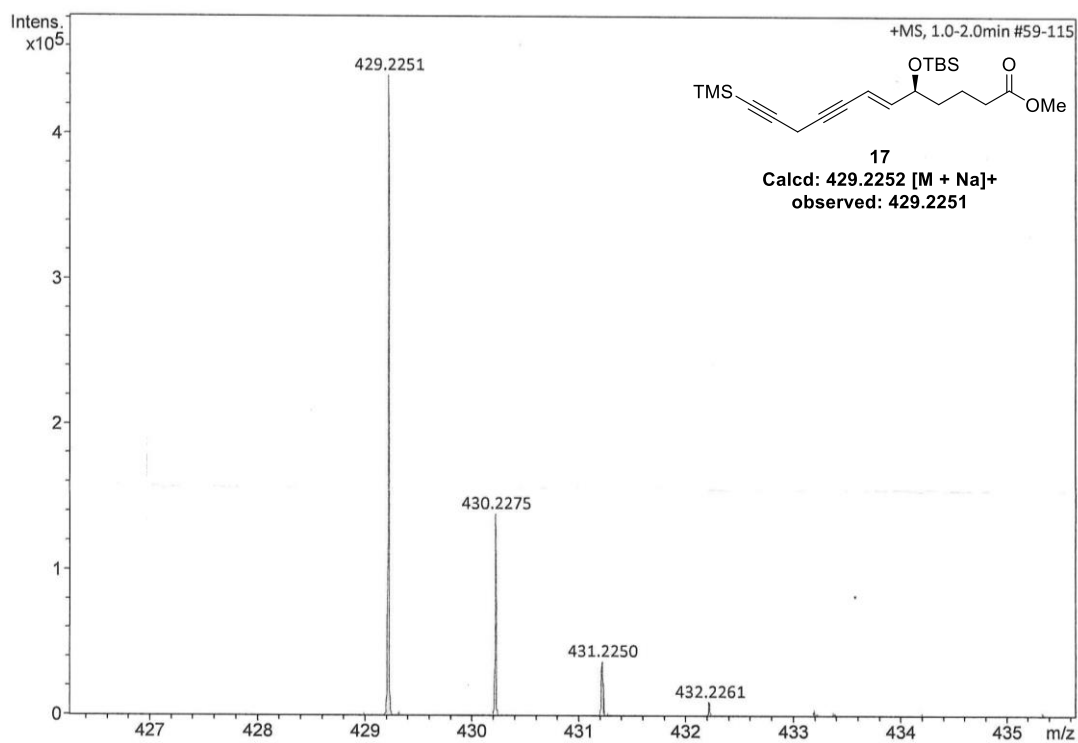

| Meas. m/z | Ion Formula                                                      | m/z      | err [ppm] |
|-----------|------------------------------------------------------------------|----------|-----------|
| 429.2251  | C <sub>28</sub> H <sub>33</sub> O <sub>2</sub> Si                | 429.2244 | -1.6      |
|           | C <sub>22</sub> H <sub>38</sub> NaO <sub>3</sub> Si <sub>2</sub> | 429.2252 | 0.1       |
|           | C <sub>25</sub> H <sub>33</sub> O <sub>6</sub>                   | 429.2272 | 4.8       |
|           | C <sub>24</sub> H <sub>30</sub> N <sub>4</sub> NaO <sub>2</sub>  | 429.2261 | 2.3       |
|           | C <sub>22</sub> H <sub>25</sub> N <sub>10</sub>                  | 429.2258 | 1.6       |
|           | C <sub>23</sub> H <sub>34</sub> NaO <sub>6</sub>                 | 429.2248 | -0.8      |

**Figure S-62** HRMS spectrum of compound **17**.

**Acquisition Parameter**

|             |            |                      |          |                  |           |
|-------------|------------|----------------------|----------|------------------|-----------|
| Source Type | ESI        | Ion Polarity         | Positive | Set Nebulizer    | 0.4 Bar   |
| Focus       | Not active | Set Capillary        | 3500 V   | Set Dry Heater   | 200 °C    |
| Scan Begin  | 50 m/z     | Set End Plate Offset | -500 V   | Set Dry Gas      | 4.0 l/min |
| Scan End    | 1500 m/z   | Set Charging Voltage | 2000 V   | Set Divert Valve | Waste     |
|             |            | Set Corona           | 0 nA     | Set APCI Heater  | 0 °C      |

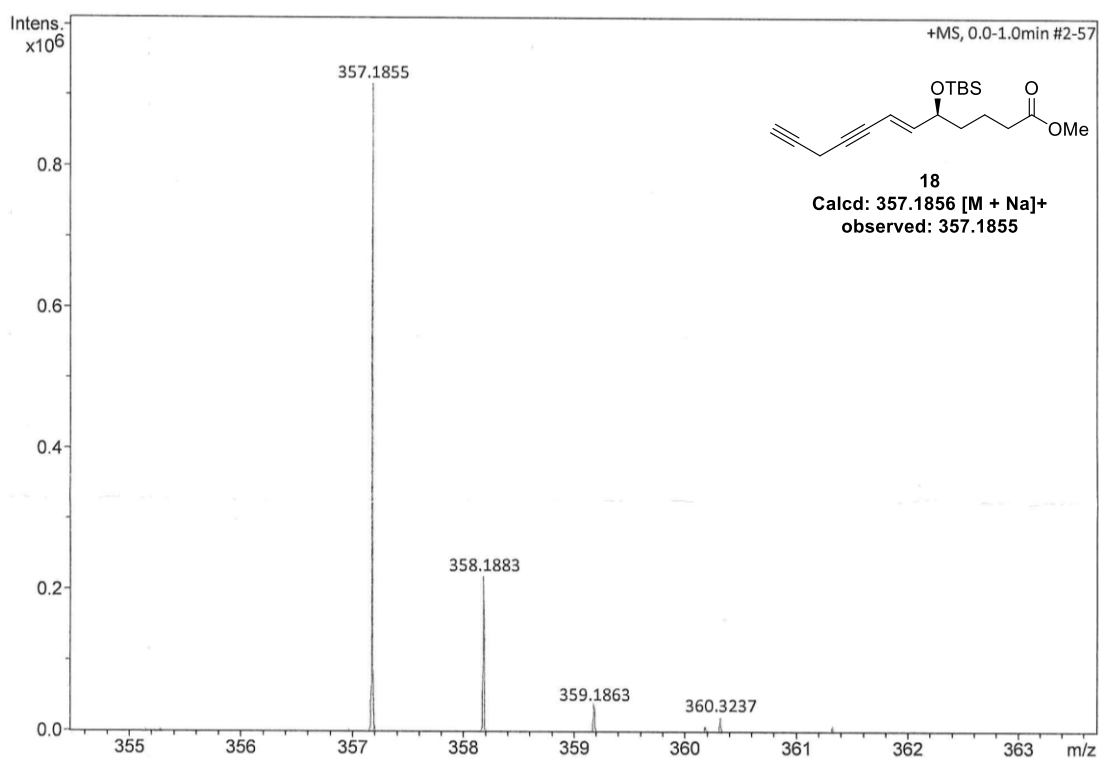

| Meas. m/z | Ion Formula                                                      | m/z      | err [ppm] |
|-----------|------------------------------------------------------------------|----------|-----------|
| 357.1855  | C <sub>23</sub> H <sub>26</sub> NaO <sub>2</sub>                 | 357.1825 | -8.5      |
|           | C <sub>16</sub> H <sub>29</sub> N <sub>2</sub> O <sub>5</sub> Si | 357.1840 | -4.2      |
|           | C <sub>17</sub> H <sub>25</sub> N <sub>6</sub> O <sub>5</sub> Si | 357.1854 | -0.5      |
|           | C <sub>19</sub> H <sub>30</sub> NaO <sub>3</sub> Si              | 357.1856 | 0.3       |
|           | C <sub>25</sub> H <sub>25</sub> O <sub>2</sub>                   | 357.1849 | -1.7      |
|           | C <sub>21</sub> H <sub>29</sub> O <sub>3</sub> Si                | 357.1880 | 7.1       |
|           | C <sub>16</sub> H <sub>30</sub> NaO <sub>7</sub>                 | 357.1884 | 8.0       |

**Figure S-63** HRMS spectrum of compound **18**.

**Acquisition Parameter**

|             |            |                      |          |                  |           |
|-------------|------------|----------------------|----------|------------------|-----------|
| Source Type | ESI        | Ion Polarity         | Positive | Set Nebulizer    | 0.4 Bar   |
| Focus       | Not active | Set Capillary        | 3500 V   | Set Dry Heater   | 200 °C    |
| Scan Begin  | 50 m/z     | Set End Plate Offset | -500 V   | Set Dry Gas      | 4.0 l/min |
| Scan End    | 1500 m/z   | Set Charging Voltage | 2000 V   | Set Divert Valve | Waste     |
|             |            | Set Corona           | 0 nA     | Set APCI Heater  | 0 °C      |

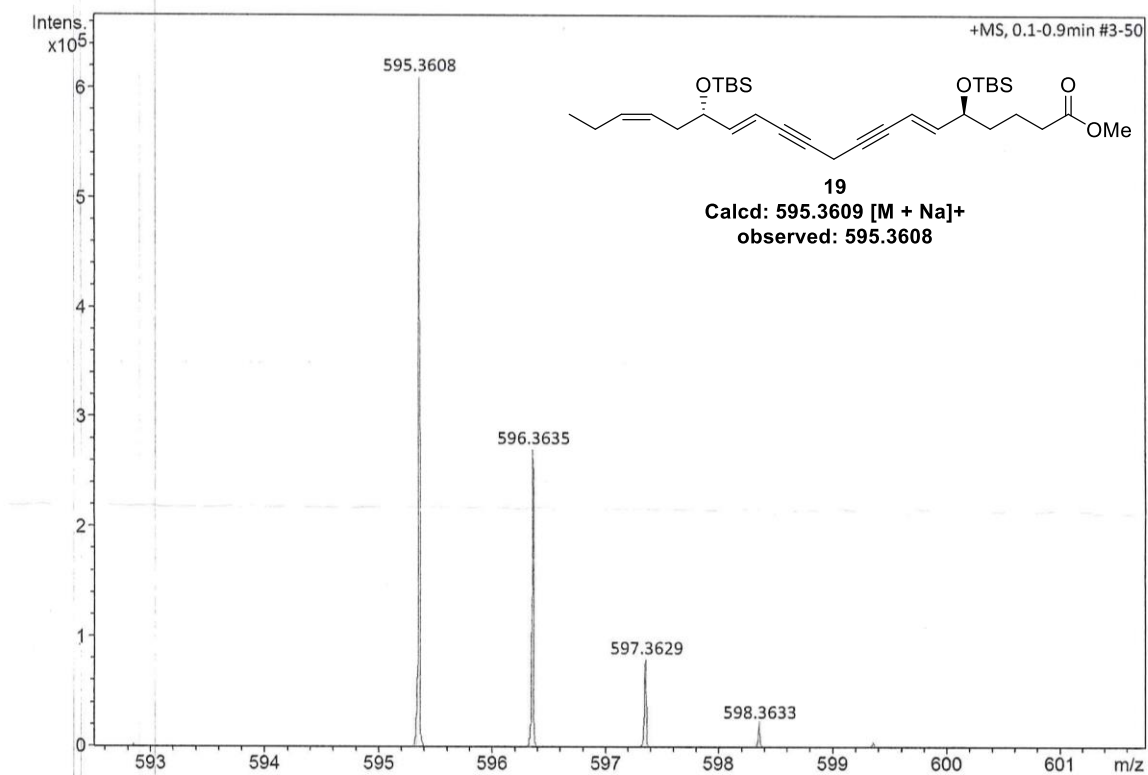

| Meas. m/z | Ion Formula                                                      | m/z      | err [ppm] |
|-----------|------------------------------------------------------------------|----------|-----------|
| 595.3608  | C <sub>39</sub> H <sub>51</sub> O <sub>3</sub> Si                | 595.3602 | -1.0      |
|           | C <sub>33</sub> H <sub>56</sub> NaO <sub>4</sub> Si <sub>2</sub> | 595.3609 | 0.2       |
|           | C <sub>34</sub> H <sub>52</sub> N <sub>4</sub> NaSi <sub>2</sub> | 595.3623 | 2.5       |
|           | C <sub>35</sub> H <sub>48</sub> N <sub>4</sub> NaO <sub>3</sub>  | 595.3619 | 1.8       |
|           | C <sub>33</sub> H <sub>43</sub> N <sub>10</sub> O                | 595.3616 | 1.3       |
|           | C <sub>34</sub> H <sub>52</sub> NaO <sub>7</sub>                 | 595.3605 | -0.5      |
|           | C <sub>32</sub> H <sub>47</sub> N <sub>6</sub> O <sub>5</sub>    | 595.3602 | -0.9      |

**Figure S-64** HRMS spectrum of compound **19**.

**Acquisition Parameter**

|             |            |                      |          |                  |           |
|-------------|------------|----------------------|----------|------------------|-----------|
| Source Type | ESI        | Ion Polarity         | Positive | Set Nebulizer    | 0.4 Bar   |
| Focus       | Not active | Set Capillary        | 3500 V   | Set Dry Heater   | 200 °C    |
| Scan Begin  | 50 m/z     | Set End Plate Offset | -500 V   | Set Dry Gas      | 4.0 l/min |
| Scan End    | 1500 m/z   | Set Charging Voltage | 2000 V   | Set Divert Valve | Waste     |
|             |            | Set Corona           | 0 nA     | Set APCI Heater  | 0 °C      |

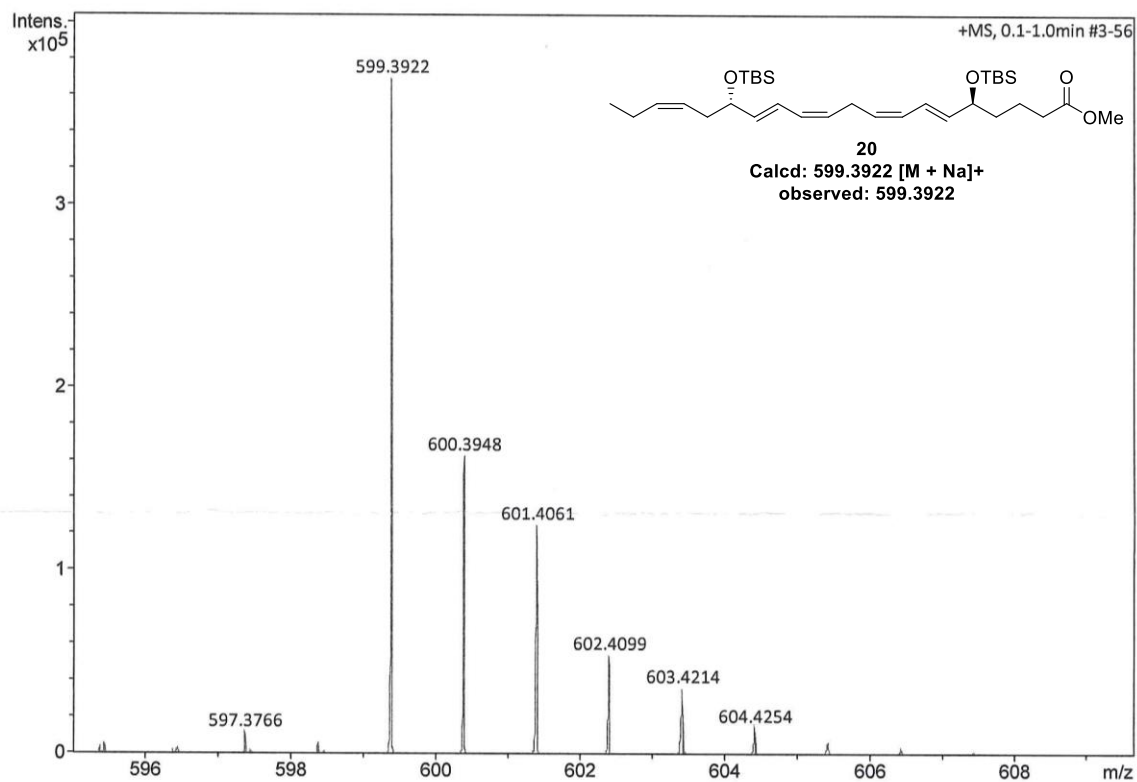

| Meas. m/z | Ion Formula                                                      | m/z      | err [ppm] |
|-----------|------------------------------------------------------------------|----------|-----------|
| 599.3922  | C <sub>33</sub> H <sub>60</sub> NaO <sub>4</sub> Si <sub>2</sub> | 599.3922 | 0.1       |
|           | C <sub>34</sub> H <sub>56</sub> N <sub>4</sub> NaSi <sub>2</sub> | 599.3936 | 2.3       |
|           | C <sub>39</sub> H <sub>55</sub> O <sub>3</sub> Si                | 599.3915 | -1.1      |
|           | C <sub>35</sub> H <sub>52</sub> N <sub>4</sub> NaO <sub>3</sub>  | 599.3932 | 1.7       |
|           | C <sub>34</sub> H <sub>56</sub> NaO <sub>7</sub>                 | 599.3918 | -0.6      |
|           | C <sub>33</sub> H <sub>47</sub> N <sub>10</sub> O                | 599.3929 | 1.2       |
|           | C <sub>32</sub> H <sub>51</sub> N <sub>6</sub> O <sub>5</sub>    | 599.3915 | -1.0      |

**Figure S-65** HRMS spectrum of compound **20**.

**Acquisition Parameter**

|             |            |                      |          |                  |           |
|-------------|------------|----------------------|----------|------------------|-----------|
| Source Type | ESI        | Ion Polarity         | Positive | Set Nebulizer    | 0.4 Bar   |
| Focus       | Not active | Set Capillary        | 3500 V   | Set Dry Heater   | 200 °C    |
| Scan Begin  | 50 m/z     | Set End Plate Offset | -500 V   | Set Dry Gas      | 4.0 l/min |
| Scan End    | 1500 m/z   | Set Charging Voltage | 2000 V   | Set Divert Valve | Waste     |
|             |            | Set Corona           | 0 nA     | Set APCI Heater  | 0 °C      |

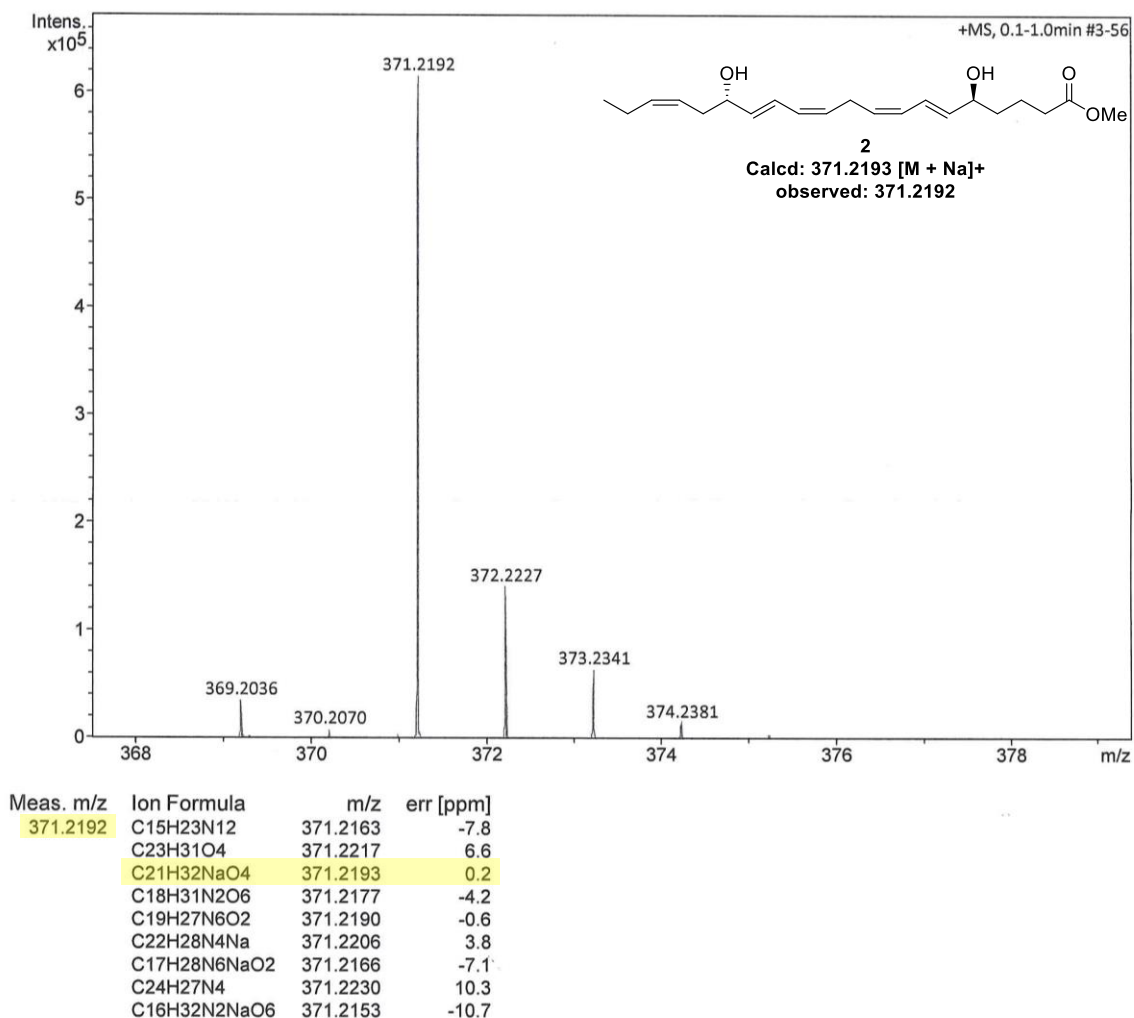

**Figure S-66** HRMS spectrum of RvE4 methyl ester (**2**).

**Specific optical rotation measurements:  
Confirmation of absolute configuration for key fragments**

Stereospecific total synthesis of prostaglandins E<sub>3</sub> and F<sub>3α</sub>  
Corey, E. J. et al. *J. Am. Chem. Soc.* **1971**, 93, 6, 1490–1491

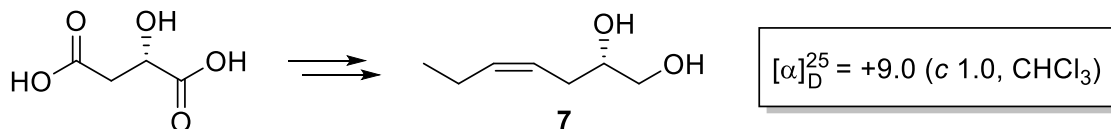

**This work:**

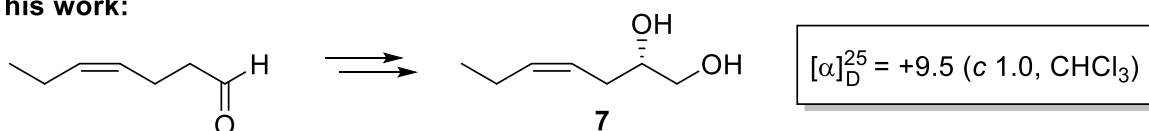

An efficient total synthesis of leukotriene B<sub>4</sub>  
Hansen, T. V. et al. *Org. Biomol. Chem.* **2015**, 13, 5412–5417

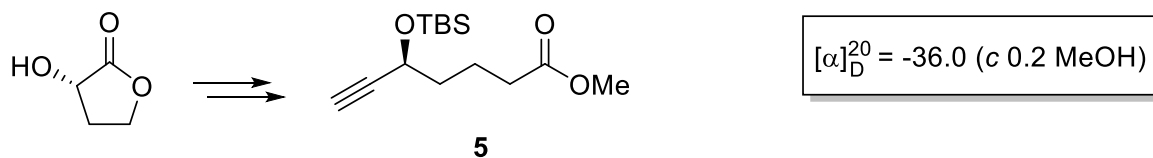

**This work:**

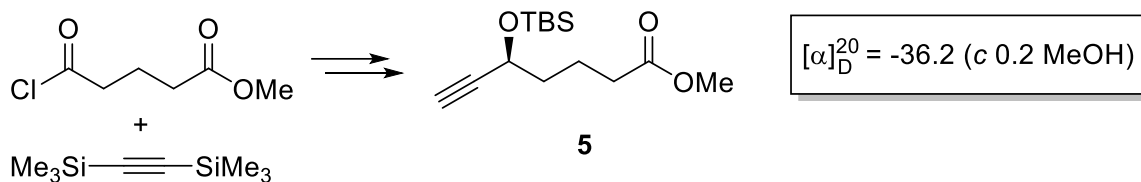

**Figure S-67** Specific optical rotations measurements to confirm absolute configurations.
